# Supplementary material for: Long-read sequencing of the coffee bean transcriptome reveals the diversity of full-length transcripts
Source: PubMed Central journal article supplement (PMC5737654; doi:10.1093/gigascience/gix086), 2017-08-30

1  
2 **Long-read sequencing of the coffee bean transcriptome reveals the diversity of full-length**  
3 **transcripts**  
4

5  
6 Bing Cheng, Agnelo Furtado, Robert J. Henry<sup>1</sup>

7  
8 Queensland Alliance for Agriculture and Food Innovation, The University of Queensland, St Lucia,  
9 QLD 4072, Australia

10  
11  
12  
13  
14  
15  
16  
17  
18  
19  
20  
21  
22  
23  
24  
25  
26  
27  
28  
29  
30  
31  
32  
33  
34  
35  
36  
37  
38  
39  
40  
41  
42  
43  
44  
45  
46  
47  
48  
49  
50  
51  
52  
53  
54  
55  
56  
57  
58  
59  
60  
61  
62  
63  
64  
65

---

29 **Abstract**

30 **Background:** Polyploidization contributes to the complexity of gene expression resulting in  
31 numerous related but different transcripts. This study explored the transcriptome diversity  
32 and complexity of tetraploid Arabica coffee (*Coffea arabica*) bean. Long-read sequencing  
33 (LRS) by Pacbio Isoform sequencing (Iso-seq) was used to obtain full-length transcripts  
34 without the difficulty and uncertainty of assembly required for reads from short read  
35 technologies. The tetraploid transcriptome was annotated and compared with data from the  
36 sub-genome progenitors. Caffeine and sucrose genes were targeted for case analysis.

37 **Findings:** An isoform-level tetraploid coffee bean reference transcriptome with 95,995  
38 distinct transcripts (average 3,236 bp) was obtained. A total of 88,715 sequences (92.42%)  
39 were annotated with BLASTx against NCBI non-redundant plant proteins, including 34,719  
40 high quality annotations. Further BLASTn to NCBI non-redundant nucleotide sequences, *C.*  
41 *canephora* coding sequences with UTR, *C.arabica* ESTs and Rfam resulted in 1,213  
42 sequences without hits, were potential novel genes in coffee. Longer UTRs were captured,  
43 especially in the 5'UTRs, facilitating the identification of upstream ORFs (uORFs). The LRS  
44 also revealed more and longer transcript variants in key caffeine and sucrose metabolism  
45 genes from this polyploid genome. Long sequences (>10kb) were poorly annotated.

46 **Conclusions:** LRS technology shows the limitation of previous studies. It provides an  
47 important tool to produce a reference transcriptome including more of the diversity of full-  
48 length transcripts to help understand the biology and support the genetic improvement of  
49 polyploid species such as coffee.

50 **Keywords:** coffee, transcriptome, full-length cDNA, long sequences, isoform, polyploid,  
51 UTR

## 52 **Background**

53 Polyploidy creates a complicated transcriptome with diverse transcript isoforms. As an  
54 important evolutionary process in plants, polyploidization generates new species and  
55 increases biodiversity [1]. A balance of genetic and biochemical features is required for the  
56 polyploid to survive while carrying multiple genomes in the same nucleus [2]. Genetic  
57 changes associated with the formation of polyploids include gene function, which may  
58 remain unchanged, or diversification among the multiple homeologs, leading to  
59 neofunctionalization, subfunctionalization, or pseudogenization [3]. Alternative splicing and  
60 polyadenylation also contribute further to the diversity of transcripts [4, 5]. Additionally,  
61 different 5'UTRs account for transcript variation, however, limited information is available  
62 on this for most genes. This diversity may include different functional motifs, like upstream  
63 open reading frames, or introns harboured in this area, influencing post-transcription  
64 expression [6, 7]. All these influences contribute to the diversity and complexity of a  
65 polyploid transcriptome.

66 The transcriptome represents all the genes expressed in the cell or tissue. RNA sequencing  
67 (RNA-Seq) makes it possible to capture the identity of these genes. Generating a reference  
68 transcriptome is essential for studying variation in expression of genes and the influence of  
69 genotype or environment on their expression [8, 9]. Most studies generate a reference  
70 transcriptome by short-read sequencing and reconstruct the transcriptome by the assembly  
71 and/or mapping of reads to other available reference genomes [10-12]. However, this is  
72 difficult for long transcripts, repetitive sequences and transposable elements. It is particularly  
73 challenging for complex polyploid genomes [13]. The LRS technology (e.g. PacBio) has  
74 recently become available and this technology overcomes these difficulties by generating  
75 sequence information for the full length as a single sequence read, including very long  
76 transcripts (*e.g.* those exceeding 10kb) without the need for further assembly. This technique

1  
2  
3  
4  
5  
6  
7  
8  
9  
10  
11  
12  
13  
14  
15  
16  
17  
18  
19  
20  
21  
22  
23  
24  
25  
26  
27  
28  
29  
30  
31  
32  
33  
34  
35  
36  
37  
38  
39  
40  
41  
42  
43  
44  
45  
46  
47  
48  
49  
50  
51  
52  
53  
54  
55  
56  
57  
58  
59  
60  
61  
62  
63  
64  
65

77 has been applied in a few plant studies and provides further information on transcript  
78 diversity, including alternative splicing and alternative polyadenylation [4, 5].  
79 Arabica coffee is a recent allotetraploid ( $2n=4x=44$ ; ~50,000 years old) derived from *C.*  
80 *canephora* and *C. eugenioides*. A high-quality reference genome and annotation are not yet  
81 available for Arabica coffee. However, a draft genome is available for one of the sub-  
82 genomes, *C. canephora* [14]. Arabica coffee is highly regarded by coffee consumers, is of  
83 great economic value and accounts for almost 70% of world coffee traded [15] However, it is  
84 produced in limited high altitude tropical environments and is threatened by climate change.  
85 Understanding the genetic and environmental control of coffee quality will be facilitated by  
86 the availability of detailed knowledge of the transcriptome of the coffee bean. This study  
87 used LRS by Pacbio Iso-seq to characterise the Arabica coffee bean transcriptome including  
88 beans from immature, intermediate and mature stages in order to explore the complex  
89 polyploid system and establish a reference transcriptome for future studies of gene  
90 expression.

## 91 **Data Description**

### 92 *RNA sample preparation*

93 Fruits at different development stages (immature, intermediate and mature fruits) of *Coffea*  
94 *arabica* var. K7 (Supporting Information 1 Fig. S1) were harvested from Green Cauldron  
95 Coffee, Federal, Australia. Ten coffee trees were selected randomly and 5 coffee fruits were  
96 collected separately for each tree and each stage of development. Samples were collected in  
97 triplicate. In total, 450 coffee fruits (900 beans) from 45 trees were collected. Once each fruit  
98 was harvested, the pericarp was removed immediately with a scalpel in 20 s or less. The  
99 coffee beans were immediately frozen in liquid nitrogen, transported on dry ice and stored at  
100 -80 °C until further use. Total RNA was extracted from coffee fruits as described by Furtado

101 [16]. Isolated RNA was assessed for integrity using an Agilent RNA 6000 nano kit and chips  
102 on a Bioanalyzer 2100 (Agilent Technologies, California, USA) and processed further for  
103 cDNA preparation.

#### 104 *cDNA preparation*

105 The Pacbio Iso-seq protocol was used for cDNA preparation. cDNA was synthesised using a  
106 Clontech SMARTer PCR cDNA Synthesis kit (ClonTech, Takara Bio Inc., Shiga, Japan) and  
107 amplified using a KAPA HIFI PCR kit (Kapa Biosystems, Boston, USA). The double-  
108 stranded cDNA was split into two sub-samples. One was used directly for sequencing. The  
109 other set was normalised to equalise transcript abundance and obtain rare sequences.

110 The cDNA was purified for normalisation using a QIAquick PCR Purification Kit (Qiagen).

111 The purified cDNA was precipitated and normalised with a Trimmer-2 cDNA normalisation  
112 kit (Evrogen, Moscow, Russia). The resulting cDNA was evaluated and quantified using an  
113 Agilent DNA 12000 Kit and Chips on a Bioanalyzer 2100 (Agilent Technologies, California,  
114 USA). The same amount of non-normalized and normalised cDNA was used as input for  
115 Pacbio Iso-seq.

116 Samples were subjected to a Pacbio Iso-Seq protocol through purification, size selection  
117 (Blue Pippin system), re-amplification, SMRTbell template preparation and Iso-seq on a  
118 Pacbio RS II platform. A size selection protocol was applied as smaller cDNAs are more  
119 abundant and would otherwise be preferentially sequenced. Four Bluepippin bins were  
120 selected for non-normalized cDNA sequencing, with size ranges of 0.5-2.5kb, 2-3.5kb, 3-  
121 6.5kb and 5-10kb, respectively since Pacbio sequencing preferentially sequences short DNA  
122 fragments. Two bins were selected for normalised cDNA sequencing, 2-3.5kb and 3-6.5kb, as  
123 the normalisation biases against longer sequences.

124 *Raw read processing and error correction*

1  
2 125 Sequence data was processed through the RS IsoSeq (version 2.3) pipeline [17]. The first step  
3  
4  
5 126 was to remove adapters and artefacts to generate reads of insert (ROIs) consensus sequences.  
6  
7 127 Short sequences less than 300 bp were removed as the Bluepippin cDNA size selection starts  
8  
9 128 from 500 bp, where some sequences less than 500 bp have a chance to be sequenced. Non-  
10  
11 129 Chimeric ROIs sequences were filtered into two groups of sequences comprised of full-length  
12  
13 130 ROIs sequences and non-full length ROIs sequences. Full-length (FL) ROIs sequences were  
14  
15 131 identified based on the presence of the 5'-adaptor sequence, the 3' adapter sequences (both  
16  
17 132 used in the library preparation) and poly (A) tail. Further, FL ROIs sequences were passed  
18  
19 133 through the isoform-level clustering (ICE). ROI sequences were used to correct errors  
20  
21 134 (polish) the isoform sequences using the Quiver software module. The polishing process of  
22  
23 135 Quiver generated two isoform sequence files, one with high quality (HQ) isoform sequences  
24  
25 136 and the other with low quality (LQ) isoform sequences corresponding to an expected  
26  
27 137 accuracy of  $\geq 99\%$  or below respectively. LQ output (or non-FL coverage sequences) is  
28  
29 138 useful in some cases, as it may result from rare transcripts or lower coverage sequences. And  
30  
31 139 these low coverage sequences can be further used to correct errors in HQ output. The Primer  
32  
33 140 IIA sequence motifs (used in the library preparation) which escaped removal at the ROIs  
34  
35 141 stage corresponded to 11 sequences were trimmed using CLC genomic workbench 9.0 (CLC,  
36  
37 142 QIAGEN, CLC Bio, Denmark). After combining the HQ and LQ transcripts, further  
38  
39 143 clustering was processed with CD-HIT-EST (c=0.99) [18].  
40  
41  
42  
43  
44  
45  
46  
47  
48

49 144 In the following step, the contaminant sequences were removed by CLC stepwise as follows.  
50

51  
52 145 1) Chloroplast transcript sequences were identified by BLASTn to the *C.arabica* complete  
53  
54 146 chloroplast genome (GenBank: EF044213.1). 2) Mitochondrial transcripts were characterised  
55  
56 147 by BLASTn to *N. tabacum* and *V. vinifera* complete mitochondrial genomes (BA000042.1  
57  
58 148 and FM179380.1). 3) Ribosomal sequences were detected by BLASTn to the reported  
59  
60  
61  
62  
63  
64  
65

149 *C.arabica*, *C.canephora* and *C. eugenoides* ribosomal genes (AJ224846, EU650386,  
1  
2  
3 150 DQ153609, AF416459, EU650384, EU650385, AF542981, AF542990, JX459583,  
4  
5 151 JX459584, JX459585, JX459586, JX459587, DQ153593, AF542982, DQ423064,  
6  
7 152 DQ153588, DQ153621, AF542986). 4) Virus, viroid and prokaryote contaminants were  
8  
9 153 identified with BLASTn to their reference genomes from the NCBI database (April 4<sup>th</sup>,  
10  
11 154 2017). Prokaryotic contaminants were screened with available reference genomes from NCBI  
12  
13 155 (Feb 9<sup>th</sup>, 2017). 5) Fungal sequences were investigated by BLASTn to fungal proteins (April  
14  
15 156 4<sup>th</sup>, 2017). All the above analyses were processed one after another with a maximum E-value  
16  
17 157 threshold of 1e-10.  
18  
19  
20  
21  
22 158 From the BLASTn results, significant matches were filtered with a bit score (A)  $\geq$  300 as  
23  
24 159 well as identity  $\geq$  80%. In each step, the filtered significant sequences were processed further  
25  
26 160 with cloud BLASTn to the NCBI non-redundant database (bit score: B) to further confirm the  
27  
28 161 matches. This validation step was confirmed by comparison of the bit score (comparison of  
29  
30 162 value A and B). If the higher bit score was associated with a contaminant sequence in the  
31  
32 163 BLASTn (A>B), then the sequence was discarded. In total 526 sequences corresponding to  
33  
34 164 chloroplastic (200), mitochondrial (264), ribosomal (37), viral (0), viroid (0), prokaryotic (0)  
35  
36 165 and fungal (25) contaminant sequences, respectively, were removed in this process. Sequence  
37  
38 166 quality was then accessed with the Fasta Statistics through Galaxy/GVL 4.0 [19]. This set of  
39  
40 167 Iso-seq processed isoforms was used for further analysis and hereafter named the “Coffee  
41  
42 168 long read sequencing (coffee-LRS) isoforms”. The term ‘isoforms’, or ‘isoform sequence’ or  
43  
44 169 ‘transcript’ used in this study represent individual sequences from the coffee-LRS isoforms,  
45  
46 170 while “transcript variants” indicate different transcript of a gene, including alternative spliced  
47  
48 171 variants, homeologs, etc.  
49  
50  
51  
52  
53  
54  
55  
56  
57  
58  
59  
60  
61  
62  
63  
64  
65

172 *Transcriptome annotation*

1  
2 173 A number of databases were used for annotation of the coffee-LRS isoforms described as  
3  
4  
5 174 follows. 1) The plant Geninfo identifier (GI) list was downloaded from NCBI Protein Entrez  
6  
7 175 (May 2<sup>nd</sup>, 2017, 8,431,379 items). The plant proteins were retrieved from the NR database  
8  
9  
10 176 using this GI list, yielding 5,099,147 sequences (NR-plant). Then, the full set of the coffee-  
11  
12 177 LRS isoforms was submitted to stand-alone BLASTx against the NR database below 1e-10.  
13  
14 178 2) Sequences without hits from step 1 were submitted further to NCBI non-redundant  
15  
16  
17 179 nucleotide sequences (NT, May 5<sup>th</sup>, 2017) BLASTn at 1e-10. 3) Sequences without a hit from  
18  
19 180 step 2 were processed further with BLASTn (1e-20) to *C. canephora* coding sequences  
20  
21  
22 181 (CDS) with UTR and *C. arabica* EST database [20, 21]. 4) The output of BLASTx was  
23  
24 182 filtered with query coverage (Qcovs), cumulative identity (ID) and sequence length into three  
25  
26  
27 183 categories, high, medium and low quality annotation. Query coverage indicates the input  
28  
29 184 coffee-LRS isoforms covered by the matched sequences. Cumulative identity represents the  
30  
31  
32 185 identity length to the aligned length (AL). ID can be expressed as the ratio of the sum of  
33  
34 186 identity length to the sum of the aligned length of all the Hsps (High-scoring Segment Pairs)  
35  
36  
37 187 of a subject. The four databases above, NR plant, NT, *C. canephora* CDS with UTR and *C.*  
38  
39 188 *arabica* EST database, are named as FOUR databases in this manuscript. Finally, all the  
40  
41 189 BLASTx and BLASTn results were processed by function annotation with BLAST2GO.  
42  
43  
44 190 The Blast2GO Pro 4.0 (North America, US: USA2 Version: b2g\_Sep 16) pipeline was based  
45  
46  
47 191 on default settings [22]. InterProScan (IPS) was used to search sequence protein domains  
48  
49 192 from EBI databases to improve annotation (North America, US: USA2, Version: b2g\_Sep  
50  
51  
52 193 16). In the follow-up phase, Blast2GO Mapping, Annotation and Annex functions were  
53  
54 194 applied to retrieve GO (gene ontology) terms, select reliable annotations and increase the  
55  
56  
57 195 number of annotated isoforms respectively. The GO-slim tool was used against the plant  
58  
59  
60  
61  
62  
63  
64  
65



196 database to provide plant generic GOs. Finally, GO enzyme mapping and KEGG (Kyoto  
197 encyclopaedia of genes and genomes) pathway maps were loaded.

#### 198 *Case studies with the caffeine and sucrose genes*

199 Two case studies were performed with genes encoding caffeine and sucrose biosynthesis  
200 pathway (caffeine and sucrose genes) to investigate specifically the quality, advantage and  
201 additional potential of the coffee-LRS isoforms. Reported coffee caffeine and sucrose  
202 candidate genes were downloaded from the European Nucleotide Archive (EMBL-EBI)  
203 (Table 3 and Table 4).

204 For potential caffeine candidate genes, coffee-LRS isoforms were processed with BLASTn  
205 (1e-20) against the reported caffeine genes. Sequences with hits to the reported caffeine genes  
206 were submitted to BLASTx (1e-20) with the NR database to confirm whether they were  
207 caffeine genes (higher bit score). Confirmed transcripts (potential caffeine isoforms) and  
208 sucrose isoforms annotated by Blast2GO (potential sucrose transcripts) were further  
209 evaluated with Geneious 10.0.4 by aligning back to the reported candidate genes in allele  
210 level [24]. Motif analysis was conducted with default parameters except for “ten motifs”  
211 selected with MEME 4.11.2 [25]. UTRscan was used for UTR functional motifs annotation  
212 [26].

#### 213 *Comparison to other available coffee databases*

214 To compare with available coffee sequences, the full coffee-LRS isoforms were processed  
215 with BLASTn (1e-20) to *C.canephora* CDS with UTR and *C. arabica EST database*,  
216 respectively and the other way around [20, 21]. The *C. eugenioides* transcriptome (young  
217 leaves and mature fruits) from Illumina was also used in the comparison [23].

218 *Novel genes*

219 Coffee-LRS isoforms without hits to the FOUR databases were submitted to the Rfam  
220 database by Blast2GO Pro package for non-coding RNA analysis [27]. Sequences without  
221 hits to Rfam were probably novel genes in coffee.

222 *Analysis of long sequences*

223 In order to explore the advantage of using the LRS PacBio platform to obtain long sequences,  
224 the BLASTx and BLAST2GO functional annotation result for the coffee-LRS isoforms  
225 longer than 10kb were extracted from the total dataset.

226 **Analyses**

227 *Overview of full-Length RNA molecules from long-read sequencing*

228 A total of 2,618,905 raw reads were generated from LRS platform, which yielded 443,877  
229 reads of insert. After 8,842 short sequences (less than 300 bp) were removed, 233,464 full-  
230 length (FL) and 201,571 non-full-length (NFL) reads were generated. The individual  
231 isoforms were sequenced in average five times. In total, 95,995 coffee-LRS isoforms were  
232 recovered after sequences representing chloroplast, mitochondrial and ribosomal transcripts  
233 were removed (Table 1). The length of the sequences in this dataset ranged from 301 bp to  
234 23,335 bp, with an average length of 3,236 bp. The GC content was 41.4% and the N50 was  
235 4,865 bp.

236 The BLASTx output (against NR plant) was divided into three groups, high, medium and low  
237 quality based on Qcovs, ID and sequence length (Data description and Table 2). There were  
238 34,719 (high), 13,655 (medium) and 40,314 (low) sequences were grouped into each quality  
239 groups, respectively (supporting information 1 Table S1). Thereafter, 7,280 sequences  
240 without hits were processed with BLASTn to NT database and resulting in 1,981 sequences  
241 with hits. A total of 5,299 sequences without a hit were further accessed with *C. canephora*

242 CDS and UTR and *C.arabica* contigs. Finally, there were 1,217 sequences with no hits to any  
243 of the above databases (FOUR databases).

#### 244 *Functional Annotation*

245 Functional annotation of the coffee-LRS isoforms was investigated using different databases.

246 The data in Table 2 shows that 88,715 sequences (92.42%) had hits to NR plant proteins. A

247 total of 70,774 sequences (73.73%) matched to IPS protein domains with 33,605 IPS GOs

248 (35.01%). A number of 78,571 sequences (81.85%) had identified GOs. After the GOs were

249 merged, GOs of 58,050 sequences (60.47%) matched with GO-slim (plant).

250 Of all the hits to the NR plant proteins from BLASTx, the coffee-LRS isoforms (maximum

251 50 hits to each sequences) had the highest number of hits to the *Nicotiana tabacum* (tobacco,

252 174,6308 hits), followed by *C. canephora* (142,656 hits), *Vitis Vinifera* (grape, 134,025 hits)

253 and *Theobroma cacao* (cacao, 132,336 hits) proteins (supporting information 1 Figure S1).

254 Most hits found in tobacco were probably because the tobacco database is more extensive and

255 well annotated than those of other related species, like *C. canephora*. For top-hit species,

256 there is no doubt the majority of the sequences has top-hit with the progenitor, *C.canephora*

257 (73,587 sequences), followed by *Sesamum indicum* (1,321 sequences), *Nicotiana tabacum*

258 (767 sequences), etc. (supporting information Figure S2). The NR-plant database consists of

259 few proteins sequences from *Coffea arabica* as reflected by just 485 protein sequence hits and

260 is ranked seventh in the top-species hit list. This indicates the limit information on *Coffea*

261 *arabica*. Of the 33,512 sequences (34.91%) with IPS GOs, cytochrome P450 (IPR001128,

262 353 matches) had the most sequence matches among the IPS families (supporting information

263 1 Fig. S3).

264 Biological process (BP, 56,230 sequences) was more abundant than cellular component (CC,

265 44,528 sequences) and molecular function (MF, 45,604 sequences) (supporting information 1

266 Fig. S4). Within these functional groups, the highest number of sequences were annotated  
267 with the biosynthetic process (11,627 sequences, 20.68%), membrane component (21,175  
268 sequences, 47.55%) and transferase activity (11,921 sequences, 26.14%). A total of 156  
269 pathways with 921 enzymes were annotated by KEGG, associated with 11.97% of the whole  
270 dataset (11,489 sequences). Among these, starch and sucrose metabolism ranked as the fifth  
271 most abundant pathways, with 36 encoding enzymes and 766 isoforms annotated (supporting  
272 information 1 Fig. S5). The average number of coffee LRS isoforms encoding the 921  
273 enzymes was 18 while the highest number was found in phosphatase (EC: 3.6.1.15, 2,969  
274 sequences), encoding the purine metabolism and thiamine metabolism pathway. In  
275 comparison, only 802 sequences were associated with 142 pathways and 374 enzymes in *C.*  
276 *eugenioides* transcriptome and starch and sucrose pathway relating to 450 contigs was the  
277 most encoded pathway [23].

278 The candidate genes for the major caffeine candidate genes were not identified by KEGG  
279 pathway. To evaluate the annotated isoforms and their diversity, further analysis was  
280 performed with caffeine pathway. The sucrose pathway was also analysed as a case study as  
281 sucrose candidate genes were relatively long and highly diverse. Both of these pathways are  
282 important for the understanding of coffee quality [28].

#### 283 *Case study I: Isoform diversity in the caffeine biosynthesis pathway*

284 The caffeine pathway has been widely studied previously (Fig. 2a). Candidate genes and  
285 complete coding sequences of both transcripts and genomic DNA are available in public  
286 databases and can be used as well-established references for caffeine candidate gene analysis  
287 (Table 3). From the BLASTn output, 25 long-read transcripts were annotated and related to  
288 candidate caffeine genes. Further alignment suggests ten high quality isoforms were likely to  
289 be putative caffeine genes, including three transcript variants of *XMT1*, one of *MXMT1*, one  
290 of *MXMT2* together with two of *DXMT1* and three of *DXMT2*. All genes encoding caffeine

291 the primary pathway except the *XMT2* gene were present in this bean transcriptome (Fig. 2  
292 and Table 3). The length distribution of these isoforms ranged between 977 and 1,517bp.  
293 Importantly, all ten isoforms were extended at the 5' UTR region compared to the  
294 corresponding sequences reported in Arabica and Robusta coffee (Table 3), while eight  
295 isoforms were longer at the 3' end (Fig. 2b, 2c, 2e and supporting information 2 Fig. S6). The  
296 most extended isoform (c695597/f1p2/1421) was 136 bp longer than the previously reported  
297 candidate genes (*CaXMT1*, Fig. 2b). Nine isoforms were found to be longer than the reported  
298 genomic DNA sequences. The other isoform was likely to have resulted from an alternative  
299 polyadenylation event (c25904/f2p0/977, Fig. 2c) as two potential polyadenylation signals  
300 (AAUAAA) were identified in the 3' UTR (Fig 2d). Alternative splicing was also presented  
301 in caffeine isoforms, for example, intron retention was detected in one of the putative *DXMT2*  
302 isoforms (Fig. 2e).

303 Coffee LRS isoforms encoding *XMT1* (Fig 2b), *MXMT1* (supporting information Fig. S6)  
304 and *DXMT2* (Fig 2c, 2e) were better aligned to the corresponding *C.canephora* isoforms,  
305 individually (higher identity, Fig. 2 and supporting information Fig. S6). This indicates these  
306 transcript variants were potentially *C.canephora* sub-genome copies. In contrast, isoforms  
307 encoding *XMT2* (Fig 2c), *MXMT2* (supporting information Fig. S6) and *DXMT1* (Fig 2c,  
308 2e) were poorly aligned with *C. canephora* isoforms (more variants) and were probably  
309 *C.eugenioides* sub-genome copies.

#### 310 *Case study II: Long sucrose isoforms provide insight into the complexity of the polyploid* 311 *system*

312 Sucrose genes were used to investigate the transcriptome sequence diversity of the polyploidy  
313 system. For the sucrose synthase 1 gene (*SSI*), one of the important genes in the sucrose  
314 metabolism, nine transcript variants were identified (Fig. 3, Table 4 and Fig. 4a). Compared  
315 to c86432/f7p9/4842, the other eight transcript variants varied in motif replacement (motif 7

1 316 replaced motif 9 in c106591/f2p0/4381), deletion (for example c92344/f1p26/4662) and  
2 317 relocation (intron retention, c92296/f1p5/4676 and c91298/f1p1/3137), etc. (Fig. 4b). The  
3  
4 318 length of these nine putative *SSI* transcript variants ranged from 2,961 to 4,842 bp.

5  
6  
7  
8 319 Importantly, all the sucrose transcript variants studied in this research were extended in the  
9  
10 320 5'UTR region relative to previous reports, except for *SPSI*, c51110/f2p0/3136 (Table 4).  
11  
12 321 Some transcript variants, such as the longest putative *SSI* sequence identified,  
13  
14 322 c86432/f2p7/4842 (4,842 bp), extended 2,131 bp upstream of the *C.canephora* coding  
15  
16 323 sequence (*G-CcSSI*) and 1,994 bp upstream of the Arabica sucrose synthase 1 mRNA coding  
17  
18 324 sequence (*CaSSI*). The length of the 5' leading region of the *SSI* transcript variants ranged  
19  
20 325 between 218 and 2,131 bp (Table 5). To understand the diversity in this region, the 5' leading  
21  
22 326 sequences of the nine putative *SSI* transcript variants were scanned using the UTRdb online  
23  
24 327 server. A maximum of 12 upstream open reading frames (uORFs) were identified and the  
25  
26 328 number was positively correlated with the length of the sequences. No uORFs were identified  
27  
28 329 in the two transcript variants with short 5'UTR, c62911/f29p21/2965 (218 bp leader  
29  
30 330 sequence) and c72639/f25p28/2961 (232 bp leader sequence).  
31  
32  
33  
34  
35  
36  
37

38 331 The nine *SSI* transcript variants revealed transcript diversity that resulted largely from  
39  
40 332 different copies from the progenitors. When aligned to *G-CcSSI* (*C. canephora SSI* genomic  
41  
42 333 sequence), the top four putative *SSI* transcript variants showed high identity and consistent  
43  
44 334 nucleotide variants (like the guanine highlighted at 3,726 bp in the consensus sequence, Fig.  
45  
46 335 4c), suggesting that these were copies from the *C. canephora* sub-genome. For example,  
47  
48 336 compared to the consensus sequence, the same indels were present in 3,707bp and 3,733bp, a  
49  
50 337 cytosine at 3,713bp and guanine at 3,715bp, etc. Consistently, the sequence of intron  
51  
52 338 retention in one of the top four sequences, c91298/f1/p1/3137 (Fig. 4d) shows high homology  
53  
54 339 to the intron sequence of *C. canephora*. However, the bottom five transcript variants had a  
55  
56 340 higher number of variations compared to *G-CcSSI* that are likely to be *C. eugenioides* sub-  
57  
58  
59  
60  
61  
62  
63  
64  
65

341 genome derived copies. The lower five transcripts had lots of variations compared to  
342 *C.canephora* intron 10, further indicating this group was from a different copy, probably *C.*  
343 *eugenioides* (Fig. 4e). Additionally, some alleles of *G-CcSSI* were common in nine putative  
344 Arabica *SSI* transcript variants and Arabica sucrose synthase 1(*CaSSI*), such as the variant at  
345 3,666 bp (Fig. 4e). This type of allele probably results from different genotypes. Polyploid  
346 expression patterns were also observed in *SPI* transcript variants, the top two alignments  
347 were similar to *C.canephora* and the other two were slightly different but related. All of the  
348 four transcript variants were longer in the upstream sequences while three extended further  
349 downstream than had previously been reported.

350 Another essential potential of LRS is to explore sequences not yet complete or published. For  
351 instance, four transcript variants were identified from this research while *SPS2* has only been  
352 identified in *C. canephora* rather than *C. arabica* (Fig. 4f).

### 353 *Comparison to other available coffee databases*

354 To understand the advantage and the diversity of this polyploid coffee transcriptome, a  
355 comparison was made with the available coffee database. More than twice the number of  
356 isoforms were identified in the tetraploid Arabica LRS transcriptome (immature, intermediate  
357 and mature fruits) compared with the *C. eugenioides* contigs (36,935 de novo assembled  
358 contigs, average length: 701 bp, from immature leaves and mature fruits), *C.canephora* CDS  
359 with UTR (25,570 sequences, from a variety of tissues, including fruits) and *C. arabica* EST  
360 database (35,153 contigs, including fruits) (Table 2) [14, 20, 23]. The coffee-LRS isoforms  
361 show greater transcript length, diversity and a lower GC content. The N50 of the Pacbio  
362 dataset (4,865 bp) was more than three times longer and the average length was more than  
363 twice that of the other databases. The sequence distribution of *C.arabica* contigs peaks at 655  
364 bp while *C.canephora* CDS with UTR reaches the largest number of sequences at 1,490 bp

365 (Fig 5). Most of the sequences from the *C. canephora* CDS with UTR and the *C. arabica*  
366 EST database were less than 3,770 bp. By comparison, 39,917 coffee LRS isoforms (41.6%)  
367 were longer than 3,770 bp  
368 Results of the BLASTn analysis indicated that of the 95,995 coffee-LRS isoforms, 9,308  
369 (9.7%) had no matches to the *C.canephora* CDS with UTR while 3,682 (3.8%) isoforms had  
370 no hits to the *C.arabica* contigs. This indicates coffee-LRS isoforms are very diverse  
371 compared to these two databases. Conversely, 9,167 (26.1%) of *C.canephora* CDS with UTR  
372 and 4,830 (18.9%) of *C.arabica* contigs had no hits to the coffee-LRS isoforms. These two  
373 sets of sequences without hits are probably sequences from leaf or other tissues not expressed  
374 in the tissues investigated in this study.

#### 375 *Novel genes*

376 The 1,217 sequences without hits to the FOUR databases (NR plant proteins, NT database, *C.*  
377 *canephora* CDS with UTR and *C. arabica* EST database) were submitted to the Rfam server  
378 to predict non-coding RNAs (ncRNA). The four isoforms that matched were in three  
379 biotypes, two transcripts were identified as CD-box snoRNA, one as HACA-box snoRNA  
380 and the other one as a miRNA (supporting information Table S2). Other than these, the other  
381 1,213 sequences had no hit to the FOUR databases and Rfam are likely to be novel genes that  
382 have not been discovered in coffee or contaminants from other organisms with no sequence  
383 information to date. Length distribution of this new dataset ranged from 325 to 19,189 bp.

#### 384 *Long transcripts*

385 In order to assess the value of LRS in discovering long sequences, 577 transcripts longer than  
386 10 kb were further analysed. Functional annotation of this extremely long dataset shows the  
387 majority of the sequences (564 sequences, 97.8%) matched to the FOUR databases. The  
388 HSP/Hit coverage distribution was relatively evenly distributed from 0 to 100% compared to



1  
2  
3  
4  
5  
6  
7  
8  
9  
10  
11  
12  
13  
14  
15  
16  
17  
18  
19  
20  
21  
22  
23  
24  
25  
26  
27  
28  
29  
30  
31  
32  
33  
34  
35  
36  
37  
38  
39  
40  
41  
42  
43  
44  
45  
46  
47  
48  
49  
50  
51  
52  
53  
54  
55  
56  
57  
58  
59  
60  
61  
62  
63  
64  
65

389 the HSP/Seq coverage. In parallel, the majority of sequences distributed less than 50%  
390 HSP/Seq coverage and peaked at 6%, representing limited information of long sequences in  
391 the NR database. IPS matches were found for 352 sequences (61.0%) while 61 of them had  
392 IPS GOs. A total of 446 sequences (77.3%) were retrieved with GO terms, while 201  
393 isoforms (34.8%) from these were also annotated with GO-Slim.

394 In total, 144 sequences were classified into the biological process, with 92 sequences into  
395 cellular component and 79 into molecular function (supporting information Table Fig. S7).  
396 Among them, biosynthetic process (31 sequences), member (43 sequences) and hydrolase  
397 activity (25 sequences) were the top groups, separately, from the three functional process.  
398 Among the annotated isoforms, 18 sequences encoding 12 enzymes from 13 pathways were  
399 annotated with a KEGG pathway. The starch and sucrose metabolism ranking the third most  
400 encoded pathway with two isoforms encoding two enzymes.

## 401 **Discussion**

402 Full-length transcripts generated by LRS in this study provided an isoform level polyploid  
403 coffee bean reference transcriptome. Compared to its sub-genome progenitors, the Arabica  
404 coffee bean transcriptome was more diverse and complicated with more isoforms, enzymes  
405 and pathways. Case studies in caffeine and sucrose identified that this diversity and  
406 complexity were a result of alternative splicing, polyadenylation, 5'UTR extension and sub-  
407 genome copies. Discovery of novel genes and long transcripts was also an advantage of using  
408 the LRS technology.

### 409 *Polyploid expression*

410 Different transcript variants may vary in function within the cell and be differentially  
411 expressed in tissues or environmental conditions. The abundance of variants in the Arabica

1  
2  
3  
4  
5  
6  
7  
8  
9  
10  
11  
12  
13  
14  
15  
16  
17  
18  
19  
20  
21  
22  
23  
24  
25  
26  
27  
28  
29  
30  
31  
32  
33  
34  
35  
36  
37  
38  
39  
40  
41  
42  
43  
44  
45  
46  
47  
48  
49  
50  
51  
52  
53  
54  
55  
56  
57  
58  
59  
60  
61  
62  
63  
64  
65

412 transcriptome and case studies of caffeine and sucrose genes compared to the sub-genome  
413 progenitors clearly shows the complexity of the polyploid expression.

414 Generally, polyploidy results in three main expression patterns of non-additive expression,  
415 dominant expression in which total gene expression in the hybrid is similar to one of the  
416 parents, transgressive expression compared to the progenitors or unequal homeolog  
417 expression [1]. Previously, it was proposed in coffee that the lower caffeine in Arabica coffee  
418 was due to the *C. eugenioides* sub-genome attributes. Based on phylogenetic analysis,  
419 CaXMT1, CaMXMT1 and CaDXMT2 were believed to be from the *C. canephora* sub-  
420 genome while CaXMT2, CaMXMT2 and CaDXMT1 were from the *C. eugenioides* sub-  
421 genome[29]. *C. eugenioides* has a very low caffeine biosynthesis together with a rapid  
422 catabolism [30]. The expression of sub-genome copies from *C. eugenioides* suggested lower  
423 caffeine in Arabica coffee compared to Robusta coffee. This study supports this hypothesis of  
424 transcript variants from sub-genome copies controlling the trait.

425 Using the LRS isoforms, further studies are now possible at the isoform level (this study was  
426 at the transcript variant level) to understand sub-genome gene expression in the polyploid *C*  
427 *arabica*. First, it will be possible to determine directly whether the expression of Arabica  
428 caffeine genes follows a non-additive expression pattern. Secondly, it would be interesting to  
429 determine the reason for more transcript variants identified changes in differential expression  
430 in tissues and at development stages. Thirdly, it will be possible to determine whether this  
431 expression pattern is influenced by environment, influencing coffee quality. Fourth, whether  
432 these different gene expression patterns result in different phenotypes. Similar analysis could  
433 be applied to many other genes or pathways of interest. Isoforms and transcript variants  
434 found in LRS tetraploid Arabica coffee bean transcriptome in this study were assigned to a  
435 number of functional groups, pathways and to specific enzyme functions. Arabica is believed  
436 to be more adaptive to temperature change than its diploid parents [31]. This study may also

1 437 help elucidate the genetic basis of the higher sucrose in Arabica coffee. More generally, the  
2 438 complete polyploid transcriptome from this study will improve our understanding of the  
3  
4 439 evolutionary adaptation and plasticity of polyploid species. However, further improvement is  
5  
6  
7 440 still needed in LRS technologies to improve the sequencing depth. Candidate genes in the  
8  
9  
10 441 caffeine pathway are reported to be expressed at low levels in fruits compared to leaves,  
11  
12 442 especially XMT2 (detected by quantitative RT-PCR) [29]. Transcripts were not detected in this  
13  
14 443 study probably due to low expression of XMT2 and the PacBio iso-seq technology not being  
15  
16  
17 444 sensitive enough to capture these transcripts. This is likely to happen in the case of other  
18  
19 445 isoforms expressed at low levels that may not be captured by the Iso-Seq technology even  
20  
21  
22 446 after application of the cDNA library normalisation step, as was applied in this study.  
23

#### 24 25 447 *5'UTR extension*

26  
27 448 Full-length transcripts captured in this study show the advantage of LRS. All the caffeine and  
28  
29  
30 449 sucrose isoforms annotated in this study, except for *SPS1*, were extended in the 5'UTR  
31  
32 450 compared to those available from public databases. Previously, it was difficult to sequence  
33  
34  
35 451 the 5' end as cDNA library preparation starts from the 3' end and normally fails to reach the  
36  
37 452 5' end. Further, it was not easy to assemble the non-coding parts of transcripts as limited  
38  
39  
40 453 cDNA sequence was available to guide the assembly and confirm the contigs obtained.

41  
42 454 Therefore, less information is available on the 5'UTRs, especially for plants. Generally, the  
43  
44 455 length of the 5'UTR ranges from 100 up to a few thousand bp [32]. This length difference is  
45  
46  
47 456 proposed because of the complex gene regulation maintained in eukaryotes [33]. Few post-  
48  
49 457 transcriptional mechanisms have been studied in 5'UTRs, including the regulation by the pre-  
50  
51  
52 458 initiation complex and uORF re-initiation.

53  
54  
55 459 uORFs are common in 5'UTRs that have critical regulation. They contain their own set of  
56  
57 460 start and stop codons that can be scanned by ribosomes and translated. This regulation can  
58  
59  
60 461 inhibit translation of the main ORF transcript and reduce the amount of protein translated.

1  
2  
3  
4  
5  
6  
7  
8  
9  
10  
11  
12  
13  
14  
15  
16  
17  
18  
19  
20  
21  
22  
23  
24  
25  
26  
27  
28  
29  
30  
31  
32  
33  
34  
35  
36  
37  
38  
39  
40  
41  
42  
43  
44  
45  
46  
47  
48  
49  
50  
51  
52  
53  
54  
55  
56  
57  
58  
59  
60  
61  
62  
63  
64  
65

462 Regulation of re-initiation of uORF translation was found to be associated with the length of  
463 sequence between the uORF and the main ORF, suggesting interactions with translation  
464 factors are required before initiation of translation [34]. This was also shown to be influenced  
465 by stress conditions [34]. However, not all uORF may have a role in translation control. In  
466 the leucine zipper transcription factor (*bZIP*) 11 gene, for example, harbouring four uORFs,  
467 only uORF2 was required for this regulation and this uORF is relatively conserved [35].  
468 Other types of 5'UTR regulation may also be found such as that due to introns in the 5'UTRs.  
469 This happens to approximately 35% of human genes [6].

470 Understanding the mechanism of 5'UTR regulation will be greatly facilitated by the use of  
471 the full-length transcripts. In this study, multiple uORFs were characterised in the *SSI* 5'  
472 UTR and these may contribute to diverse functions and regulation that may be influenced by  
473 stress conditions. Climate change is a threat to Arabica coffee, which grows at high altitude.  
474 It may be possible to influence 5'UTR regulation in Arabica coffee and have the potential to  
475 influence coffee quality. To confirm this, further phenotype, proteome and metabolome  
476 studies are required.

#### 477 *Long transcripts*

478 LRS also has potential in discovering long transcripts, such as the sucrose synthase genes  
479 annotated here. Even though numerous studies have defined the sucrose pathways, not all the  
480 candidate genes have been identified. Many sucrose metabolism genes are too long to be  
481 captured by short read sequencing without significant *de novo* assembly. For example, the *C.*  
482 *arabica* *SS2* coding sequence is 2,889 bp and the genomic DNA sequence (exon 1 to 15) is  
483 5,672 bp (Table 4). Sucrose synthase genes (6-7 different isoforms) were previously  
484 identified in cotton, rice, and Arabidopsis, However, in coffee, only two had been reported  
485 [36-38]. For genes that were only previously available for *C. canephora*, (e.g. *SPI*), this  
486 study also identified isoforms in Arabica. For genes that previously only had partial

1 487 sequences available, (e.g. *SPS2*), the transcripts identified in this study will guide further  
2 488 studies and improve current databases. Furthermore, the low coverage annotation of long  
3  
4 489 sequences (>10kb) by BLASTx and BLASTn against the FOUR databases indicated the  
5  
6  
7 490 limited information on long sequences requiring further study.  
8  
9

#### 10 491 *Transcriptome analysis of polyploids using long-read sequencing*

11  
12 492 LRS technologies show advantages in understanding complex transcriptomes, especially  
13  
14  
15 493 from polyploid species [4, 39, 40]. First, this eliminates transcriptome reconstruction and that  
16  
17  
18 494 reduces the computation time. This is an essential goal for bioinformatics data analysis and  
19  
20 495 software development [41]. To avoid obsolescence, transcriptome analysis calls for rapid  
21  
22 496 genomics and bioinformatics to reduce the time from experiment to publication. Secondly, as  
23  
24  
25 497 there is no assembly of reads with LRS, there are no erroneous results due to misassemblies  
26  
27 498 caused by complex polyploid transcriptomes with a large number of repeats or homeolog  
28  
29  
30 499 genes. For example, almost 80% of the wheat genome is repetitive [40]. Last but not least, it  
31  
32 500 shows the potential to capture rare or long sequences to provide an overview of the  
33  
34  
35 501 transcriptome and fully characterise RNA diversity, like 5'UTR extension in this study,  
36  
37 502 alternative splicing, polyadenylation, etc. [4, 42].  
38  
39

40 503 However, LRS technologies have been normally biased with high error rates, for example,  
41  
42 504 previously released PacBio single molecule real-time sequencing (SMRT) reads had a very  
43  
44  
45 505 high error rate, 11-14%, therefore, numerous methods have been proposed to correct the  
46  
47  
48 506 sequences [43]. One common approach was to map back to a reference genome and (or) use  
49  
50 507 hybrid sequencing, for example, using short reads with high throughput to correct LRS  
51  
52 508 isoform sequences [5, 44]. However, caution is necessary when using this strategy. The  
53  
54  
55 509 reference genome is often far from 100% accurate: 1) most draft genomes have numerous  
56  
57 510 fragmented contigs or scaffolds with huge imbedded gaps. Even genomes previously  
58  
59  
60 511 considered well assembled have had many gaps[45]. 2) Problems also exist in poorly  
61  
62  
63  
64  
65

1  
2  
3  
4  
5  
6  
7  
8  
9  
10  
11  
12  
13  
14  
15  
16  
17  
18  
19  
20  
21  
22  
23  
24  
25  
26  
27  
28  
29  
30  
31  
32  
33  
34  
35  
36  
37  
38  
39  
40  
41  
42  
43  
44  
45  
46  
47  
48  
49  
50  
51  
52  
53  
54  
55  
56  
57  
58  
59  
60  
61  
62  
63  
64  
65

512 assembled gene loci. Few recently released genomes have been re-visited to generate  
513 improved assemblies [13]. 3) LRS isoform sequences normally come from different sources  
514 (e.g. genotype) to the reference genomes that they can be compared with. Hybrid sequencing  
515 correction may have system bias and result in loss of isoforms/transcript variants or generate  
516 a “compromised” consensus. Previously, it has been estimated that there was no approach  
517 that has achieved more than 60 % accuracy for transcript reconstruction, even for the most  
518 studied human genome [46]. For instance, short read platforms deliver data that is less  
519 representative of rare or long isoforms and there is a high chance of losing these reads from  
520 the long-read dataset when correcting.

521 Improved accuracy may be generated from the platform itself, for example, Pacbio Iso-seq  
522 generates improved accuracy from CCS reads. This allows multiple passes of each transcript.  
523 Each pass can be used to correct the others with their random errors (mainly indels). The  
524 isoform clustering and polishing in this protocol is expected to deliver 99% accuracy. Prior to  
525 size selection, normalisation was further applied in parallel to the dataset in this study to  
526 decrease the frequency of abundant reads and produce a more even representation of the  
527 transcriptome and to capture rare sequences. A highly diverse transcriptome has resulted. The  
528 abundance of genes that had not been previously sequenced (1,213), transcript variants and  
529 longer isoforms indicate the limits of previous studies and potential of LRS technologies.  
530 However, the limitation shows in detecting short sequences less than 300bp (raw data cut-  
531 off). The chances of large errors due to indels from Pacbio sequencing may produce reads  
532 shorter than the actual reads. Additionally, the Blue pippin size selection system starts from  
533 500bp in the cDNA library preparation, with few sequences from the boundary (400-500bp).  
534 Therefore, improvement is needed to capture a broader transcriptome.

1  
2  
3  
4  
5  
6  
7  
8  
9  
10  
11  
12  
13  
14  
15  
16  
17  
18  
19  
20  
21  
22  
23  
24  
25  
26  
27  
28  
29  
30  
31  
32  
33  
34  
35  
36  
37  
38  
39  
40  
41  
42  
43  
44  
45  
46  
47  
48  
49  
50  
51  
52  
53  
54  
55  
56  
57  
58  
59  
60  
61  
62  
63  
64  
65

535 In conclusion, this study will improve the understanding of the biology and genetic  
536 improvement of polyploid species such as coffee. It provides a useful technique to generate a  
537 full-length reference transcriptome and improve understanding of UTR regions.

### 538 **Additional information**

539 New sequence data used in this manuscript has been submitted to European Nucleotide  
540 Archive at EMBL database with accession number: PRJEB19262. Additionally information  
541 on specific selected sequence IDs, such as high quality annotated sequences, novel genes in  
542 coffee, etc, are shown in supporting information 2. The python script to calculate cumulative  
543 identity and alignment length has been submitted to Github  
544 ([https://github.com/chengbing0404/BLAST5\\_result\\_handle](https://github.com/chengbing0404/BLAST5_result_handle)).

### 545 **Completing interests**

546 All authors have no conflicts of interest to this manuscript.

### 547 **Funding**

548 This study was funded by Australian Research Council (PROJECT ID: LP130100376) and  
549 Chinese Scholarship Council (2014-2018).

### 550 **Author's contributions**

551 B.C., A.F. and R.H. designed the research and discussed the results. B.C performed the  
552 experiment and analysis. B.C drafted the manuscript, R.H and AG refined it.

### 553 **Acknowledgements**

554 We thank Green Cauldron Coffee (Australia) for providing coffee materials, Prathima  
555 Perumal Thirugnanasambandam for assistance in sucrose synthase analysis, Kevin Smith and  
556 Erli Wang for help in the informatics pipeline and the Research Computing Center of the  
557 University of Queensland, Australia for access to high-performance computers. We also

558 appreciated the help from Poss Reading, Marta Brozynska, Adam Healey, Tiparat Tikapunya,  
559 Ravi Nirmal, Nam Hoang and Hayba Badro in coffee sampling.

## 560 Reference

- 561 1. Yoo, M.-J., et al., *Nonadditive gene expression in polyploids*. Annual review of genetics, 2014.  
562 **48**: p. 485-517.
- 563 2. Adams, K.L., et al., *Genes duplicated by polyploidy show unequal contributions to the*  
564 *transcriptome and organ-specific reciprocal silencing*. Proceedings of the National Academy  
565 of sciences, 2003. **100**(8): p. 4649-4654.
- 566 3. Levasseur, A. and P. Pontarotti, *The role of duplications in the evolution of genomes*  
567 *highlights the need for evolutionary-based approaches in comparative genomics*. Biology  
568 direct, 2011. **6**(1): p. 11.
- 569 4. Wang, B., et al., *Unveiling the complexity of the maize transcriptome by single-molecule*  
570 *long-read sequencing*. Nature Communications, 2016. **7**.
- 571 5. Abdel-Ghany, S.E., et al., *A survey of the sorghum transcriptome using single-molecule long*  
572 *reads*. Nature Communications, 2016. **7**.
- 573 6. Bicknell, A.A., et al., *Introns in UTRs: why we should stop ignoring them*. Bioessays, 2012.  
574 **34**(12): p. 1025-1034.
- 575 7. Mignone, F., et al., *Untranslated regions of mRNAs*. Genome biology, 2002. **3**(3): p.  
576 reviews0004. 1.
- 577 8. Van Veen, H., et al., *Transcriptomes of eight Arabidopsis thaliana accessions reveal core*  
578 *conserved, genotype-and organ-specific responses to flooding stress*. Plant physiology, 2016:  
579 p. pp. 00472.2016.
- 580 9. Garg, R., et al., *Transcriptome analyses reveal genotype-and developmental stage-specific*  
581 *molecular responses to drought and salinity stresses in chickpea*. Scientific reports, 2016. **6**.
- 582 10. Grabherr, M.G., et al., *Full-length transcriptome assembly from RNA-Seq data without a*  
583 *reference genome*. Nature biotechnology, 2011. **29**(7): p. 644-652.
- 584 11. Wang, X.-W., et al., *De novo characterization of a whitefly transcriptome and analysis of its*  
585 *gene expression during development*. BMC genomics, 2010. **11**(1): p. 400.
- 586 12. Li, P., et al., *The developmental dynamics of the maize leaf transcriptome*. Nature genetics,  
587 2010. **42**(12): p. 1060-1067.
- 588 13. Michael, T.P. and R. VanBuren, *Progress, challenges and the future of crop genomes*. Current  
589 opinion in plant biology, 2015. **24**: p. 71-81.
- 590 14. Denoeud, F., et al., *The coffee genome provides insight into the convergent evolution of*  
591 *caffeine biosynthesis*. science, 2014. **345**(6201): p. 1181-1184.
- 592 15. Fridell, G., *Coffee*. 2014: John Wiley & Sons.
- 593 16. Furtado, A., *RNA Extraction from Developing or Mature Wheat Seeds*. Cereal Genomics:  
594 Methods and Protocols, 2014: p. 23-28.
- 595 17. PacificBiosciences. *RS\_IsoSeq (v2.3) Tutorial 2*. 2. Isoform level clustering (ICE and Quiver)  
596 2015; Available from:  
597 [https://github.com/PacificBiosciences/cDNA\\_primer/wiki/RS\\_IsoSeq-%28v2.3%29-](https://github.com/PacificBiosciences/cDNA_primer/wiki/RS_IsoSeq-%28v2.3%29-Tutorial-%232.-Isoform-level-clustering-%28ICE-and-Quiver%29)  
598 [Tutorial-%232.-Isoform-level-clustering-%28ICE-and-Quiver%29](https://github.com/PacificBiosciences/cDNA_primer/wiki/RS_IsoSeq-%28v2.3%29-Tutorial-%232.-Isoform-level-clustering-%28ICE-and-Quiver%29).
- 599 18. Fu, L., et al., *CD-HIT: accelerated for clustering the next-generation sequencing data*.  
600 Bioinformatics, 2012. **28**(23): p. 3150-3152.
- 601 19. Afgan, E., et al., *Genomics Virtual Laboratory: a practical bioinformatics workbench for the*  
602 *cloud*. PloS one, 2015. **10**(10): p. e0140829.
- 603 20. Mondego, J.M., et al., *An EST-based analysis identifies new genes and reveals distinctive*  
604 *gene expression features of Coffea arabica and Coffea canephora*. BMC plant biology, 2011.  
605 **11**(1): p. 1.



- 606 21. Dereeper, A., et al., *The coffee genome hub: a resource for coffee genomes*. Nucleic acids  
1 607 research, 2015. **43**(D1): p. D1028-D1035.
- 2 608 22. Götz, S., et al., *High-throughput functional annotation and data mining with the Blast2GO*  
3 609 *suite*. Nucleic acids research, 2008. **36**(10): p. 3420-3435.
- 4 610 23. Yuyama, P.M., et al., *Transcriptome analysis in Coffea eugenioides, an Arabica coffee*  
5 611 *ancestor, reveals differentially expressed genes in leaves and fruits*. Molecular Genetics and  
6 612 Genomics, 2016. **291**(1): p. 323-336.
- 7 613 24. Kearse, M., et al., *Geneious Basic: an integrated and extendable desktop software platform*  
8 614 *for the organization and analysis of sequence data*. Bioinformatics, 2012. **28**(12): p. 1647-  
9 615 1649.
- 10 616 25. Bailey, T.L., et al., *MEME SUITE: tools for motif discovery and searching*. Nucleic acids  
11 617 research, 2009: p. gkp335.
- 12 618 26. Grillo, G., et al., *UTRdb and UTRsite (RELEASE 2010): a collection of sequences and regulatory*  
13 619 *motifs of the untranslated regions of eukaryotic mRNAs*. Nucleic acids research, 2010.  
14 620 **38**(suppl 1): p. D75-D80.
- 15 621 27. Nawrocki, E.P., et al., *Rfam 12.0: updates to the RNA families database*. Nucleic acids  
16 622 research, 2014: p. gku1063.
- 17 623 28. Cheng, B., et al., *Influence of genotype and environment on coffee quality*. Trends in Food  
18 624 Science & Technology, 2016.
- 19 625 29. Perrois, C., et al., *Differential regulation of caffeine metabolism in Coffea arabica (Arabica)*  
20 626 *and Coffea canephora (Robusta)*. Planta, 2015. **241**(1): p. 179-191.
- 21 627 30. Ashihara, H. and A. Crozier, *Biosynthesis and catabolism of caffeine in low-caffeine-*  
22 628 *containing species of Coffea*. Journal of agricultural and food chemistry, 1999. **47**(8): p. 3425-  
23 629 3431.
- 24 630 31. Combes, M.C., et al., *Contribution of subgenomes to the transcriptome and their intertwined*  
25 631 *regulation in the allopolyploid Coffea arabica grown at contrasted temperatures*. New  
26 632 phytologist, 2013. **200**(1): p. 251-260.
- 27 633 32. Lodish, H., *Molecular cell biology*. 2008: Macmillan.
- 28 634 33. Rhind, N., et al., *Comparative functional genomics of the fission yeasts*. Science, 2011.  
29 635 **332**(6032): p. 930-936.
- 30 636 34. Somers, J., T. Pöyry, and A.E. Willis, *A perspective on mammalian upstream open reading*  
31 637 *frame function*. The international journal of biochemistry & cell biology, 2013. **45**(8): p.  
32 638 1690-1700.
- 33 639 35. Hummel, M., et al., *Sucrose-mediated translational control*. Annals of botany, 2009: p.  
34 640 mcp086.
- 35 641 36. Chen, A., et al., *Analyses of the sucrose synthase gene family in cotton: structure, phylogeny*  
36 642 *and expression patterns*. BMC plant biology, 2012. **12**(1): p. 85.
- 37 643 37. Hirose, T., G.N. Scofield, and T. Terao, *An expression analysis profile for the entire sucrose*  
38 644 *synthase gene family in rice*. Plant Science, 2008. **174**(5): p. 534-543.
- 39 645 38. Bieniawska, Z., et al., *Analysis of the sucrose synthase gene family in Arabidopsis*. The Plant  
40 646 Journal, 2007. **49**(5): p. 810-828.
- 41 647 39. Minoche, A.E., et al., *Exploiting single-molecule transcript sequencing for eukaryotic gene*  
42 648 *prediction*. Genome biology, 2015. **16**(1): p. 1.
- 43 649 40. Dong, L., et al., *Single-molecule real-time transcript sequencing facilitates common wheat*  
44 650 *genome annotation and grain transcriptome research*. BMC genomics, 2015. **16**(1): p. 1039.
- 45 651 41. Haas, B.J., et al., *De novo transcript sequence reconstruction from RNA-seq using the Trinity*  
46 652 *platform for reference generation and analysis*. Nature protocols, 2013. **8**(8): p. 1494-1512.
- 47 653 42. Gonzalez-Garay, M.L., *Introduction to isoform sequencing using pacific biosciences*  
48 654 *technology (Iso-Seq)*, in *Transcriptomics and Gene Regulation*. 2016, Springer. p. 141-160.
- 49 655 43. Roberts, R.J., M.O. Carneiro, and M.C. Schatz, *The advantages of SMRT sequencing*. Genome  
50 656 biology, 2013. **14**(7): p. 1.

- 657 44. Xu, Z., et al., *Full - length transcriptome sequences and splice variants obtained by a*  
 1 658 *combination of sequencing platforms applied to different root tissues of Salvia miltiorrhiza*  
 2 659 *and tanshinone biosynthesis*. The Plant Journal, 2015. **82**(6): p. 951-961.  
 3 660 45. Lamesch, P., et al., *The Arabidopsis Information Resource (TAIR): improved gene annotation*  
 4 661 *and new tools*. Nucleic acids research, 2012. **40**(D1): p. D1202-D1210.  
 5 662 46. Korf, I., *Genomics: the state of the art in RNA-seq analysis*. Nature methods, 2013. **10**(12): p.  
 6 663 1165-1166.  
 7 664  
 8

9 **664 Tables and figure legends**

10 **665** Table 1 Arabica long-read sequencing transcriptome annotation with different databases

| Databases                          | Number of sequences annotated | % of sequences annotated |
|------------------------------------|-------------------------------|--------------------------|
| Long-read sequencing transcriptome | 95,995                        | -                        |
| BLAST                              | 94,709                        | 98.66                    |
| Mapped                             | 78,571                        | 81.85                    |
| InterProScan                       | 70,774                        | 73.73                    |
| InterProScan GOs                   | 33,605                        | 35.01                    |
| GO slim                            | 58,050                        | 60.47                    |
| KEGG                               | 11,489                        | 11.97                    |

27 **666**

29 **667** Table 2 Arabica long-read sequencing isoforms compared to *Coffea canephora* coding sequences and *Coffea*  
 30 **668** *arabica* EST sequences

| Different datasets                                            | GC content % | N50 (bp)     | average length (bp) | min length (bp) | max_length (bp) | Number of sequences |
|---------------------------------------------------------------|--------------|--------------|---------------------|-----------------|-----------------|---------------------|
| <i>Coffea arabica</i> EST database <sup>1</sup> [20]          | 44.7         | 734          | 662                 | 32              | 3,584           | 35,153              |
| <i>Coffea canphora</i> coding sequences with UTR <sup>2</sup> | 42.6         | 2,046        | 1,616               | 45              | 17,206          | 25,570              |
| <b><i>Coffea arabica</i> long-read sequencing isoforms</b>    | <b>41.4</b>  | <b>4,865</b> | <b>3,236</b>        | <b>301</b>      | <b>23,335</b>   | <b>95,995</b>       |

43 **669**

44 **670** Note: <sup>1</sup> <http://bioinfo03.ibi.unicamp.br/coffea/data/CA.fasta>; <sup>2</sup> [http://coffee-genome.org/sites/coffee-](http://coffee-genome.org/sites/coffee-genome.org/files/download/coffea_cds.fna.gz)  
 45 **671** [genome.org/files/download/coffea\\_cds.fna.gz](http://coffee-genome.org/sites/coffee-genome.org/files/download/coffea_cds.fna.gz).  
 46

47 **672**

49 **673**

50  
51  
52  
53  
54  
55  
56  
57  
58  
59  
60  
61  
62  
63  
64  
65

16  
17  
18  
19  
20  
21  
22  
23  
24  
25  
26  
27  
28  
29  
30  
31  
32  
33  
34  
35  
36  
37  
38  
39  
40  
41  
42  
43  
44  
45  
46  
47  
48  
49  
50  
51  
52  
53  
54  
55  
56  
57  
58  
59  
60  
61  
62  
63  
64  
65

Table 3 Details of caffeine candidate genes, putative transcript variants annotated and 5'UTR extension information

| Candidate genes                            | Accession number | Species             | Source      | Abbreviation | length (bp) | completeness | Putative transcript variants from LRS isoform sequences   | 5'UTR extension |
|--------------------------------------------|------------------|---------------------|-------------|--------------|-------------|--------------|-----------------------------------------------------------|-----------------|
| xanthosine methyltransferase 1             | AB048793         | <i>C. arabica</i>   | mRNA        | CaXMT1       | 1,316       | YES          | c69597/f1p2/1421<br>c154338/f1p2/1360<br>c71416/f3p3/1376 | YES             |
|                                            | JX978514         | <i>C. arabica</i>   | Genomic DNA | G-CaXMT1     | 1,987       | YES          |                                                           |                 |
|                                            | DQ422954         | <i>C. canephora</i> | mRNA        | CcXMT1       | 1,316       | YES          |                                                           |                 |
|                                            | JX978509         | <i>C. canephora</i> | Genomic DNA | G-CcXMT1     | 1,994       | YES          |                                                           |                 |
| xanthosine methyltransferase2              | JX978515         | <i>C. arabica</i>   | Genomic DNA | G-CaXMT2     | 2,038       | YES          | Not identified                                            | -               |
| 7-methylxanthine N-methyltransferase 1     | AB048794         | <i>C. arabica</i>   | mRNA        | CaMXMT1      | 1,298       | YES          | c20397/f5p1/1361                                          | YES             |
|                                            | JX978511         | <i>C. arabica</i>   | Genomic DNA | G-CaMXMT1    | 1,838       | YES          |                                                           |                 |
|                                            | HQ616707         | <i>C. canephora</i> | mRNA        | CcMXMT1      | 1,222       | YES          |                                                           |                 |
|                                            | JX978507         | <i>C. canephora</i> | Genomic DNA | G-CcMXMT1    | 1,829       | YES          |                                                           |                 |
| 7-methylxanthine N-methyltransferase 2     | AB084126         | <i>C. arabica</i>   | mRNA        | CaMXMT2      | 1,155       | YES          | c10402/f2p3/1277                                          | YES             |
|                                            | JX978512         | <i>C. arabica</i>   | Genomic DNA | G-CaMXMT2    | 2,010       | YES          |                                                           |                 |
| 3,7-dimethylxanthine N-methyltransferase 1 | AB084125         | <i>C. arabica</i>   | mRNA        | CaDXMT1      | 1,155       | YES          | c25904/f2p0/977<br>c71881/f6p2/1386                       | YES             |
|                                            | JX978510         | <i>C. arabica</i>   | Genomic DNA | G-CaDXMT1    | 2,063       | YES          |                                                           |                 |
| 3,7-dimethylxanthine N-methyltransferase 2 | KJ577793         | <i>C. arabica</i>   | mRNA        | CaDXMT2      | 1,155       | YES          | c63815/f1p2/1273<br>c48759/f1p1/1517<br>c26870/f6p5/1402  | YES             |
|                                            | KJ577792         | <i>C. arabica</i>   | Genomic DNA | G-CaDXMT2    | 2,006       | YES          |                                                           |                 |
|                                            | DQ422955         | <i>C. canephora</i> | mRNA        | CcDXMT1      | 1,364       | YES          |                                                           |                 |

16  
17  
18  
19  
20  
21  
22  
23  
24  
25  
26  
27  
28  
29  
30  
31  
32  
33  
34  
35  
36  
37  
38  
39  
40  
41  
42  
43  
44  
45  
46  
47  
48  
49  
50  
51  
52  
53  
54  
55  
56  
57  
58  
59  
60  
61  
62  
63  
64  
65

Table 4 Details of sucrose candidate genes, putative transcript variants annotated and 5'UTR extension information

| Candidate genes              | Accession number | Species             | Source      | Abbreviation | length (bp) | completeness | Putative transcript variants from LRS isoform sequences                                      | 5'UTR extension |
|------------------------------|------------------|---------------------|-------------|--------------|-------------|--------------|----------------------------------------------------------------------------------------------|-----------------|
| Sucrose synthase 1           | AM087674.1       | <i>C. arabica</i>   | mRNA        | CaSS1        | 2,979       | YES          | c86432/f7p9/4842<br>c91298/f1p1/3137<br>c84406/f3p18/2975                                    | YES             |
|                              | DQ834312.1       | <i>C. canephora</i> | mRNA        | CcSS2        | 2,989       | YES          | c62911/f29p21/2965<br>c92344/f1p26/4662<br>c92296/f1p5/4676<br>c89510/f1p6/4592              |                 |
|                              | AJ880768.2       | <i>C. canephora</i> | Genomic DNA | G-CcSS1      | 3,957       | exon 1-13    | c106591/f2p0/4381<br>c72639/f25p28/2961                                                      |                 |
| Sucrose synthase 2           | AM087675.1       | <i>C. arabica</i>   | mRNA        | CaSS2        | 2,889       | YES          | c73322/f3p2/3080                                                                             | YES             |
|                              | AM087676.1       | <i>C. canephora</i> | Genomic DNA | G-CcSS2      | 5,672       | exon 1-15    | c75363/f3p2/2906                                                                             |                 |
| Sucrose phosphate synthase 1 | DQ834321.1       | <i>C. canephora</i> | mRNA        | CcSPS1       | 3,150       | YES          | c51110/f2p0/3136                                                                             | YES             |
|                              | DQ842233.1       | <i>C. canephora</i> | Genomic DNA | G-CcSPS1     | 8,215       | YES          |                                                                                              |                 |
| Sucrose phosphate synthase 2 | DQ842234.1       | <i>C. canephora</i> | Genomic DNA | G-CcSPS2     | 1,550       | NO           | c103631/f1p2/4695<br>c88660/f2p0/4282<br>c106342/f1p4/4274<br>c104672/f1p1/4440<br>(reverse) | YES             |

Table 5 Results of 5' UTRs from long-read sequencing scanned with UTRdb. uORF, Upstream Open Reading Frame.

| No. | Sequence name      | 5' UTR length (bp) | uORF |
|-----|--------------------|--------------------|------|
| 1   | c86432/f2p7/4842   | 2,131              | 12   |
| 2   | c91298/f1p1/3137   | 347                | 2    |
| 3   | c84406/f3p18/2975  | 242                | 2    |
| 4   | c62911/f29p21/2965 | 218                | 0    |
| 5   | c92344/f1p26/4662  | 1,981              | 10   |
| 6   | c92296/f1p5/4676   | 1,884              | 12   |
| 7   | c89510/f1p6/4592   | 1,871              | 11   |
| 8   | c106591/f2p0/4381  | 1,683              | 11   |
| 9   | c72639/f25p28/2961 | 224                | 0    |

Figure 1 Coffee fruits of immature, intermediate and mature stages

Figure 2 Sequence distribution, comparison of the number of sequences and their length. Coffee long-read sequencing isoforms, *C.canephora* coding sequences with UTR and *C. arabica* EST database were included.

Figure 3 Putative transcript variants from long-read sequencing aligned to reference caffeine genes. a. Main caffeine biosynthesis pathway in coffee, adaptive from Cheng, Furtado [28]. b. Alignment of three Arabica putative XMT1 variants from long-read sequencing (c69597/f1p2/1412, c154338/f1p2/1360 and c71416/f3p3/1376), *Coffea arabica* and *Coffea canephora* XMT1 (CaXMT1 and CcXMT1) to Arabica XMT1 genomic DNA sequence (G-CaXMT1). c. Possible alternative polyadenylation of putative XMT1 Iso-seq variant (c25904/f2p0/977) from long-read sequencing; G-CaDXMT1, Arabica DXMT1 genomic DNA sequence; CaDXMT1, DXMT1 coding sequence; d. Two polyadenylation signals were identified in 3'ends of c25904/f2p0/977; e. Possible alternative splicing (intron retention) in one of the putative DXMT2 variants (c48759/f1p1/1517) from long-read sequencing transcripts; G-CaDXMT2, Arabica DXMT2 genomic DNA sequence; CaDXMT2, Arabica DXMT2 coding sequence. (Note: black colour in the alignment means different nucleotides to reference sequence, Arabica genomic XMT1, while grey colour means the same nucleotides as the reference.).

Figure 4 Motif search results of putative sucrose synthase gene 1 from long read sequencing. a. Ten motifs were annotated in 9 putative sucrose synthase 1 variants from long-read sequencing, analysed by MEME 4.11.2. b. Motif location of 9 putative sucrose synthase 1 variants. Different motifs were highlighted with red arrows and intron retention was shown with dashed boxes.

Figure 5 Putative variants from long-read sequencing aligned to the reference sucrose genes. a. Possible sucrose metabolism in coffee; SS, sucrose synthase; SPS, sucrose phosphate synthase; SP, sucrose phosphatase; INV, invertase; CINV, cell wall invertase (modified from Cheng B. et al. (2016)); b. Alignment of 9 Putative Sucrose synthase variants from long-read sequencing and *C.arabica* sucrose synthase gene 1 (CaSS1) to *Coffea canephora* genomic sucrose synthase 1 (exons 1-13) (G-CcSS1 (1-13)); Green box highlights variants result from different sub-genome copies, while intron retention events were marked with the blue box highlight; c. polyploid expression when zooming green area in 100%; d. possible alternative splicing (intron retention) from a *C.canephora* sub-genome copy when zooming blue box in 100%; e. possible intron retention from a *C.eugenioides* sub-genome copy when zooming blue area in 100%.red line classifies two groups of variants as different sub-genome copies. Different nucleotides compared to the consensus were highlighted in black in the alignment; f. Putative variants from long read sequencing aligned with *C.canephora* genomic sucrose phosphate synthase 2 sequence (G-CcSPS2); FWD, forward sequence; REV, reverse sequence. Different nucleotides compared to the consensus were highlighted in black in the alignment.

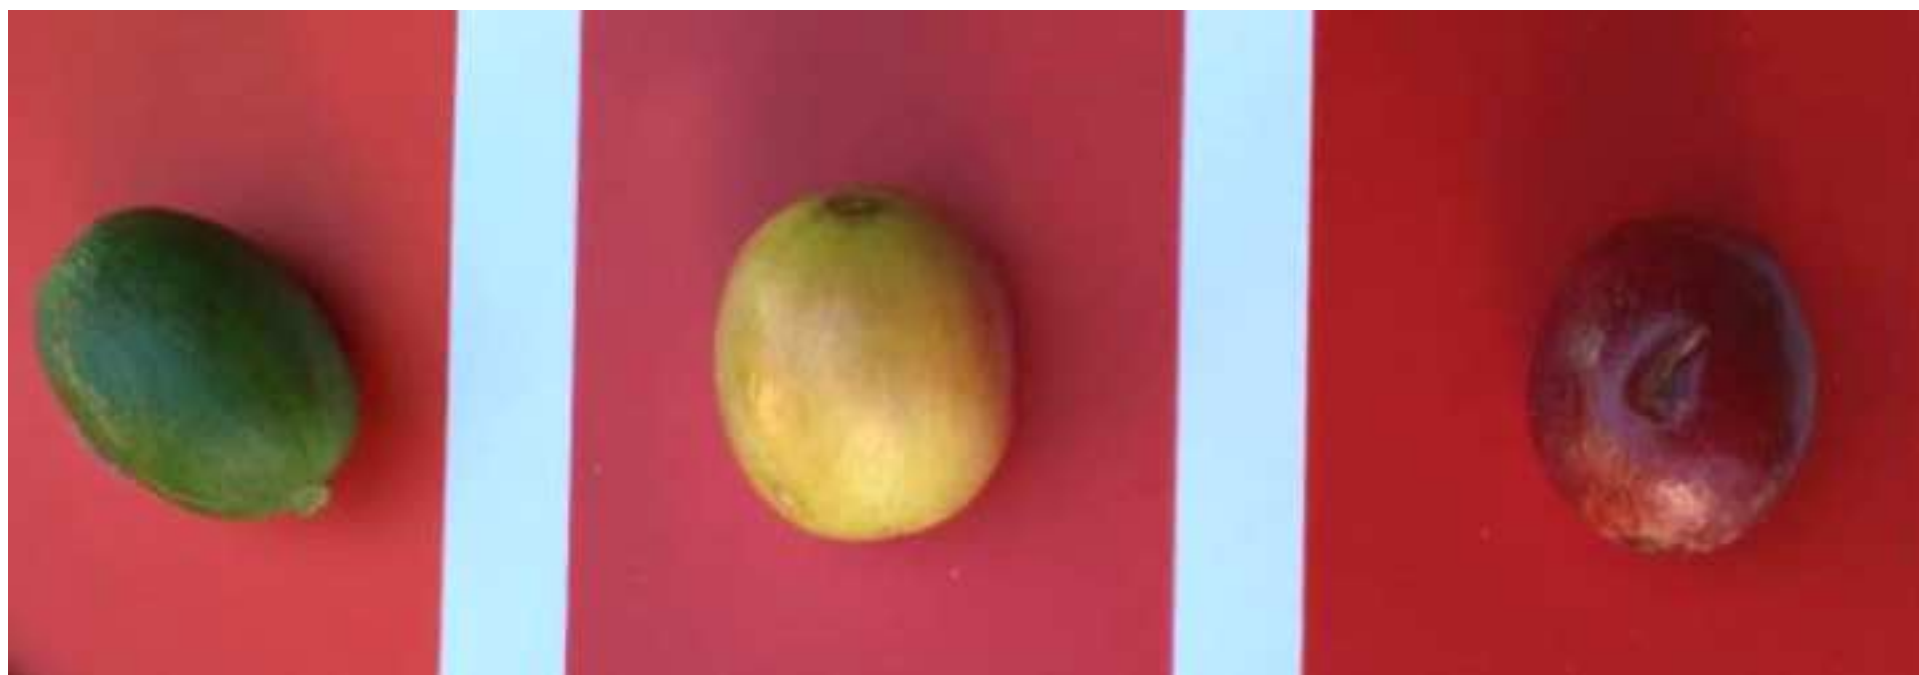

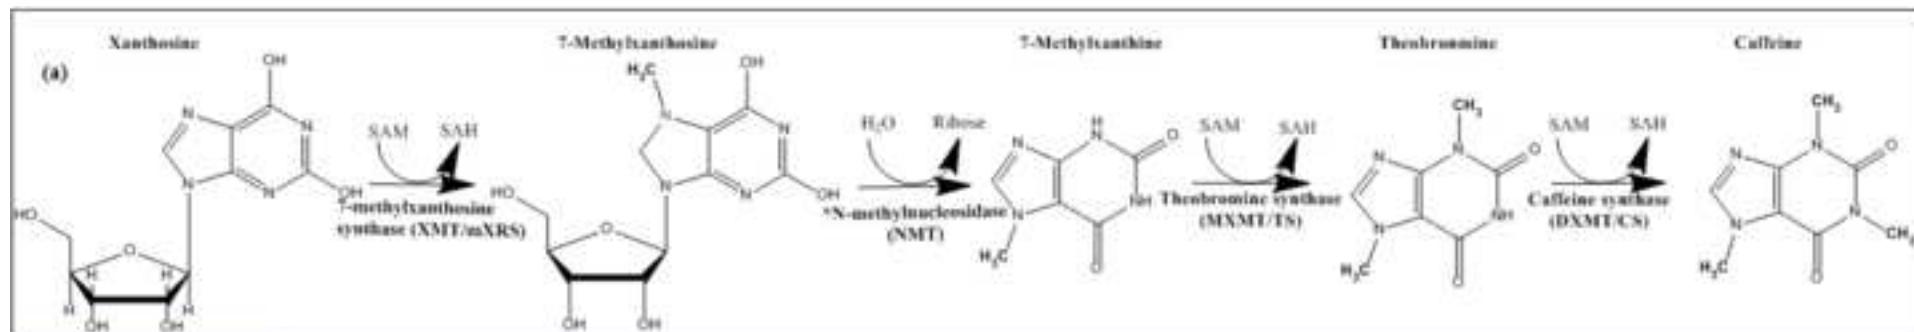

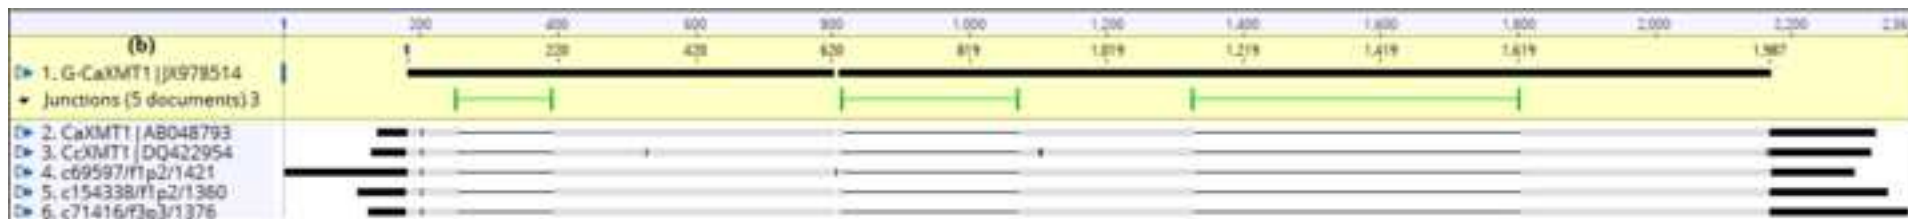



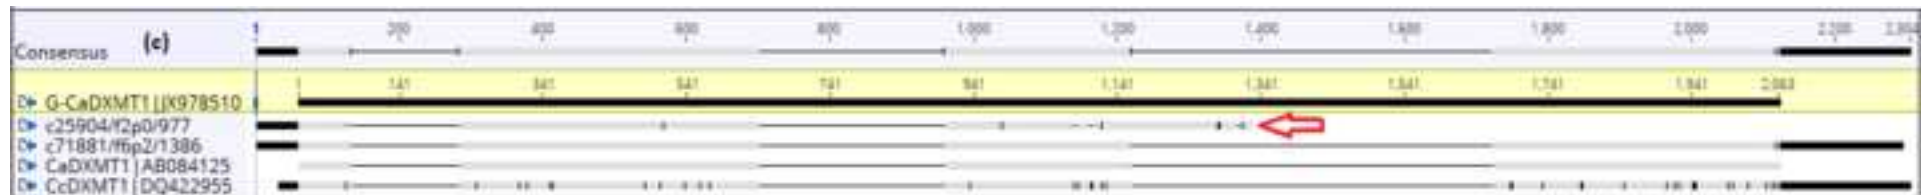

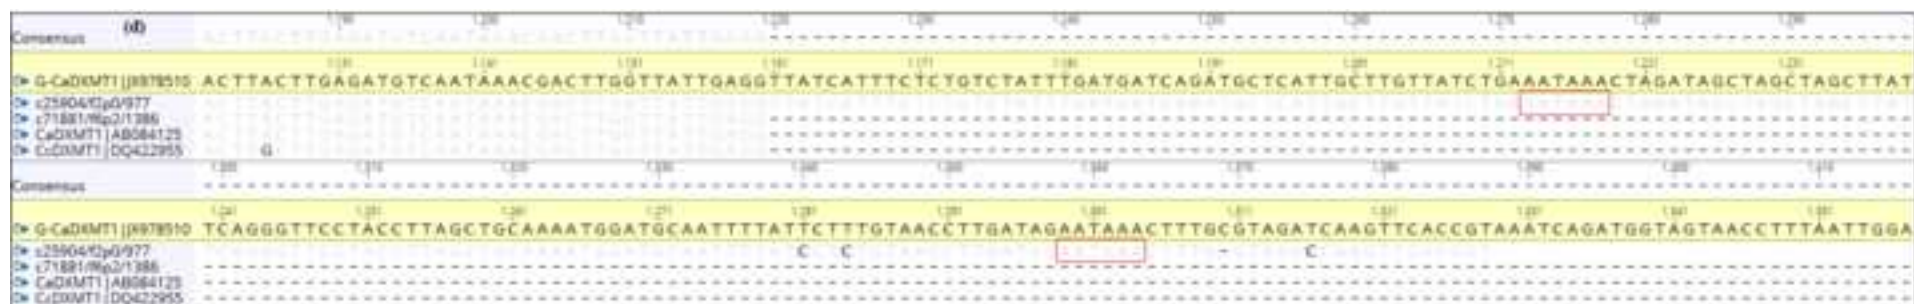

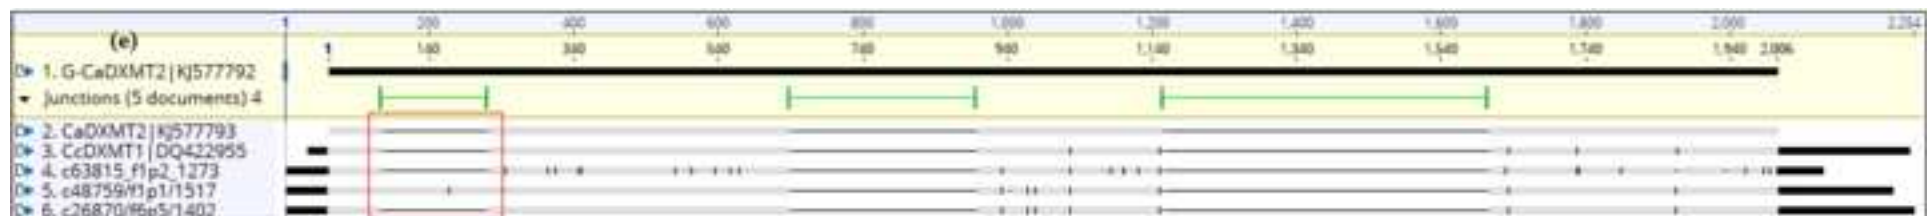

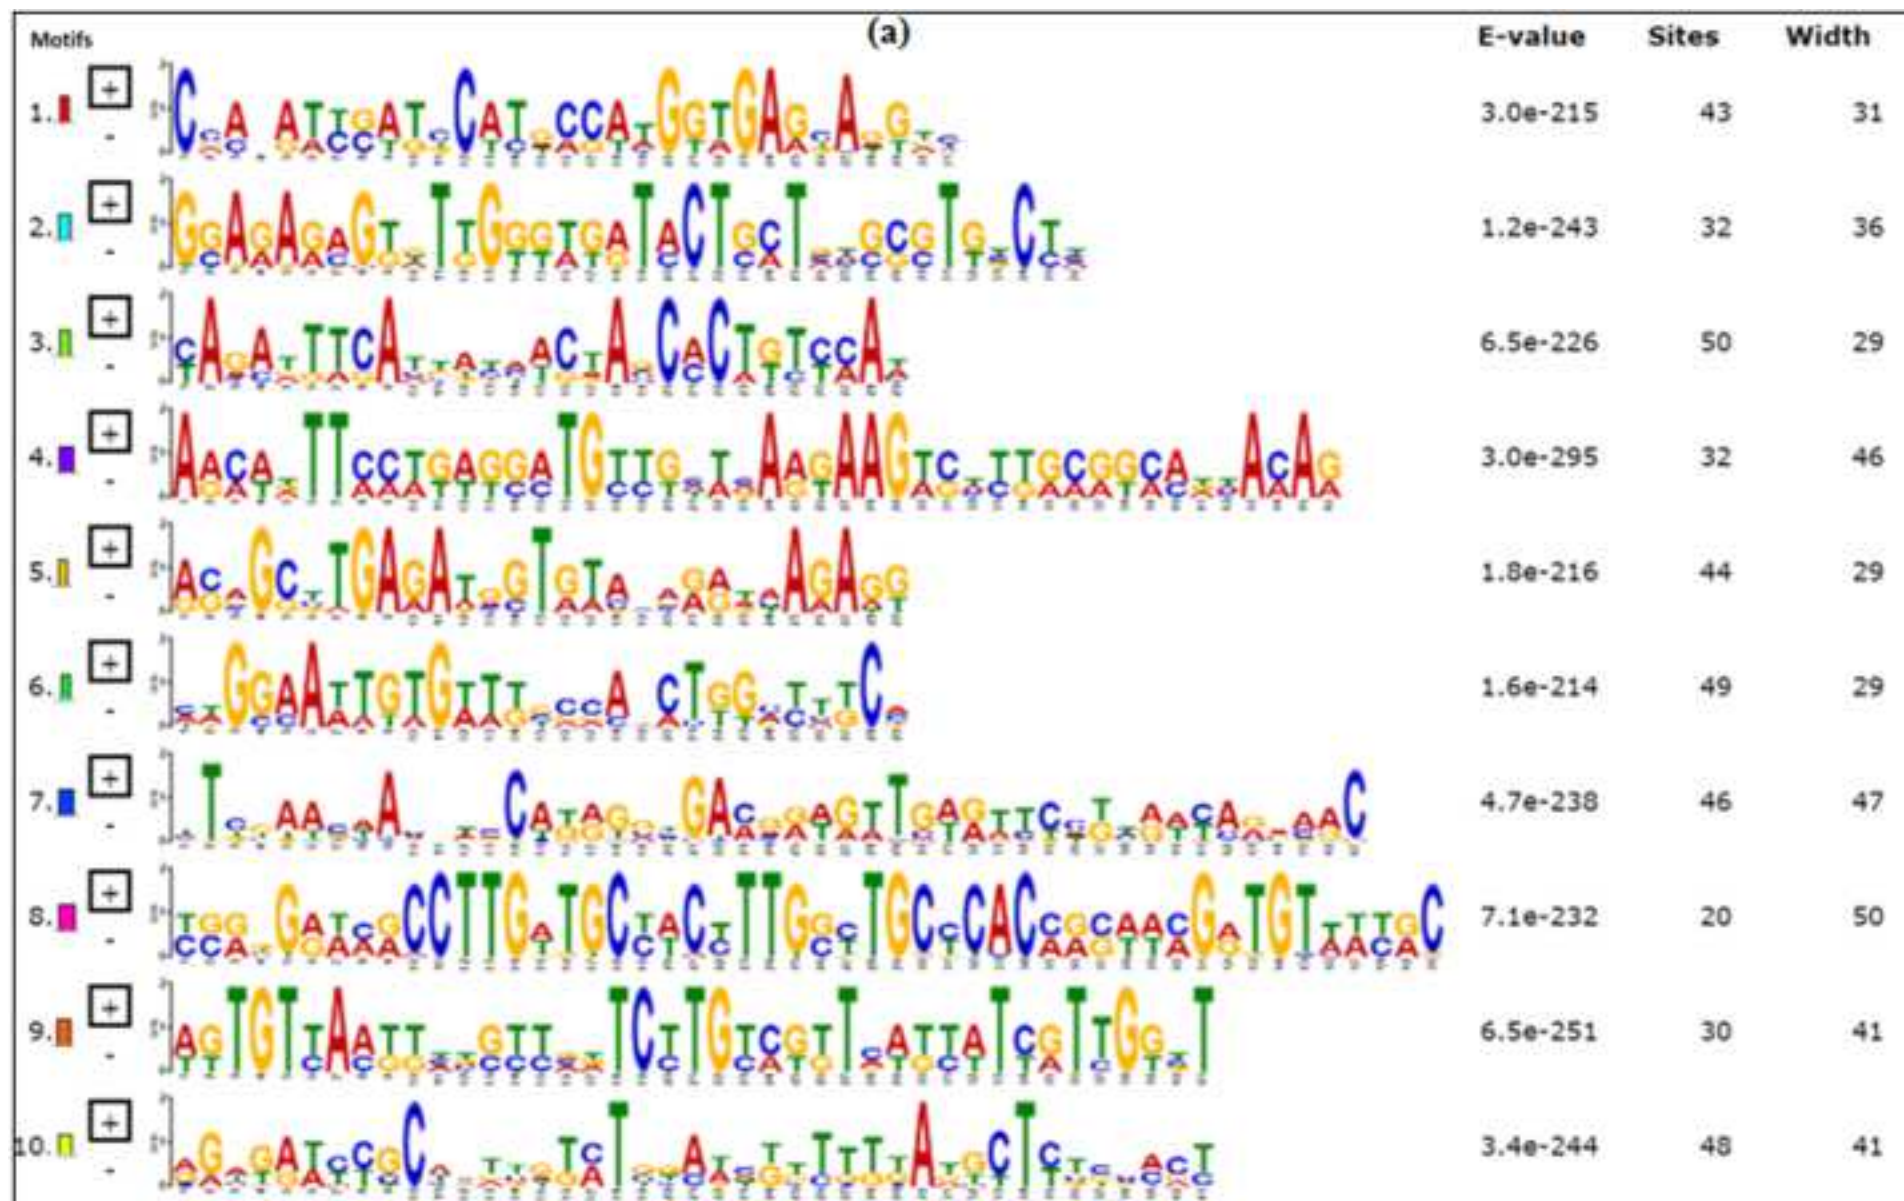

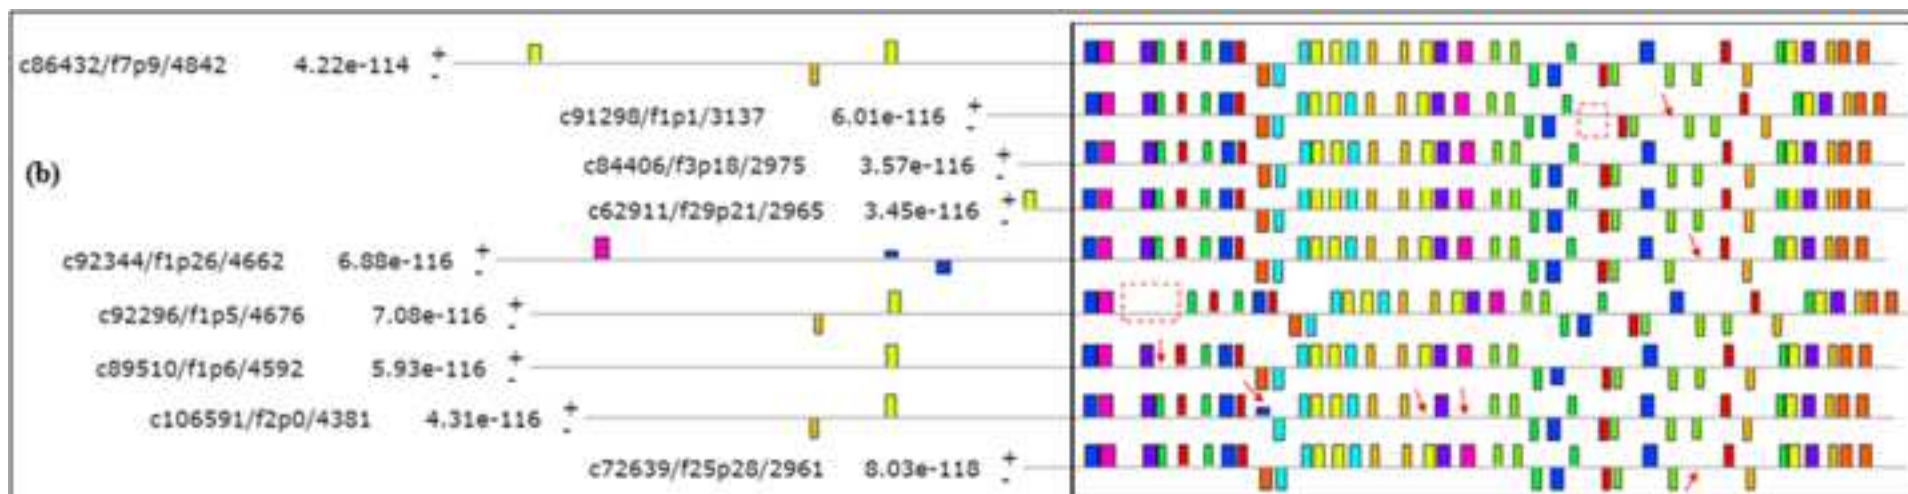

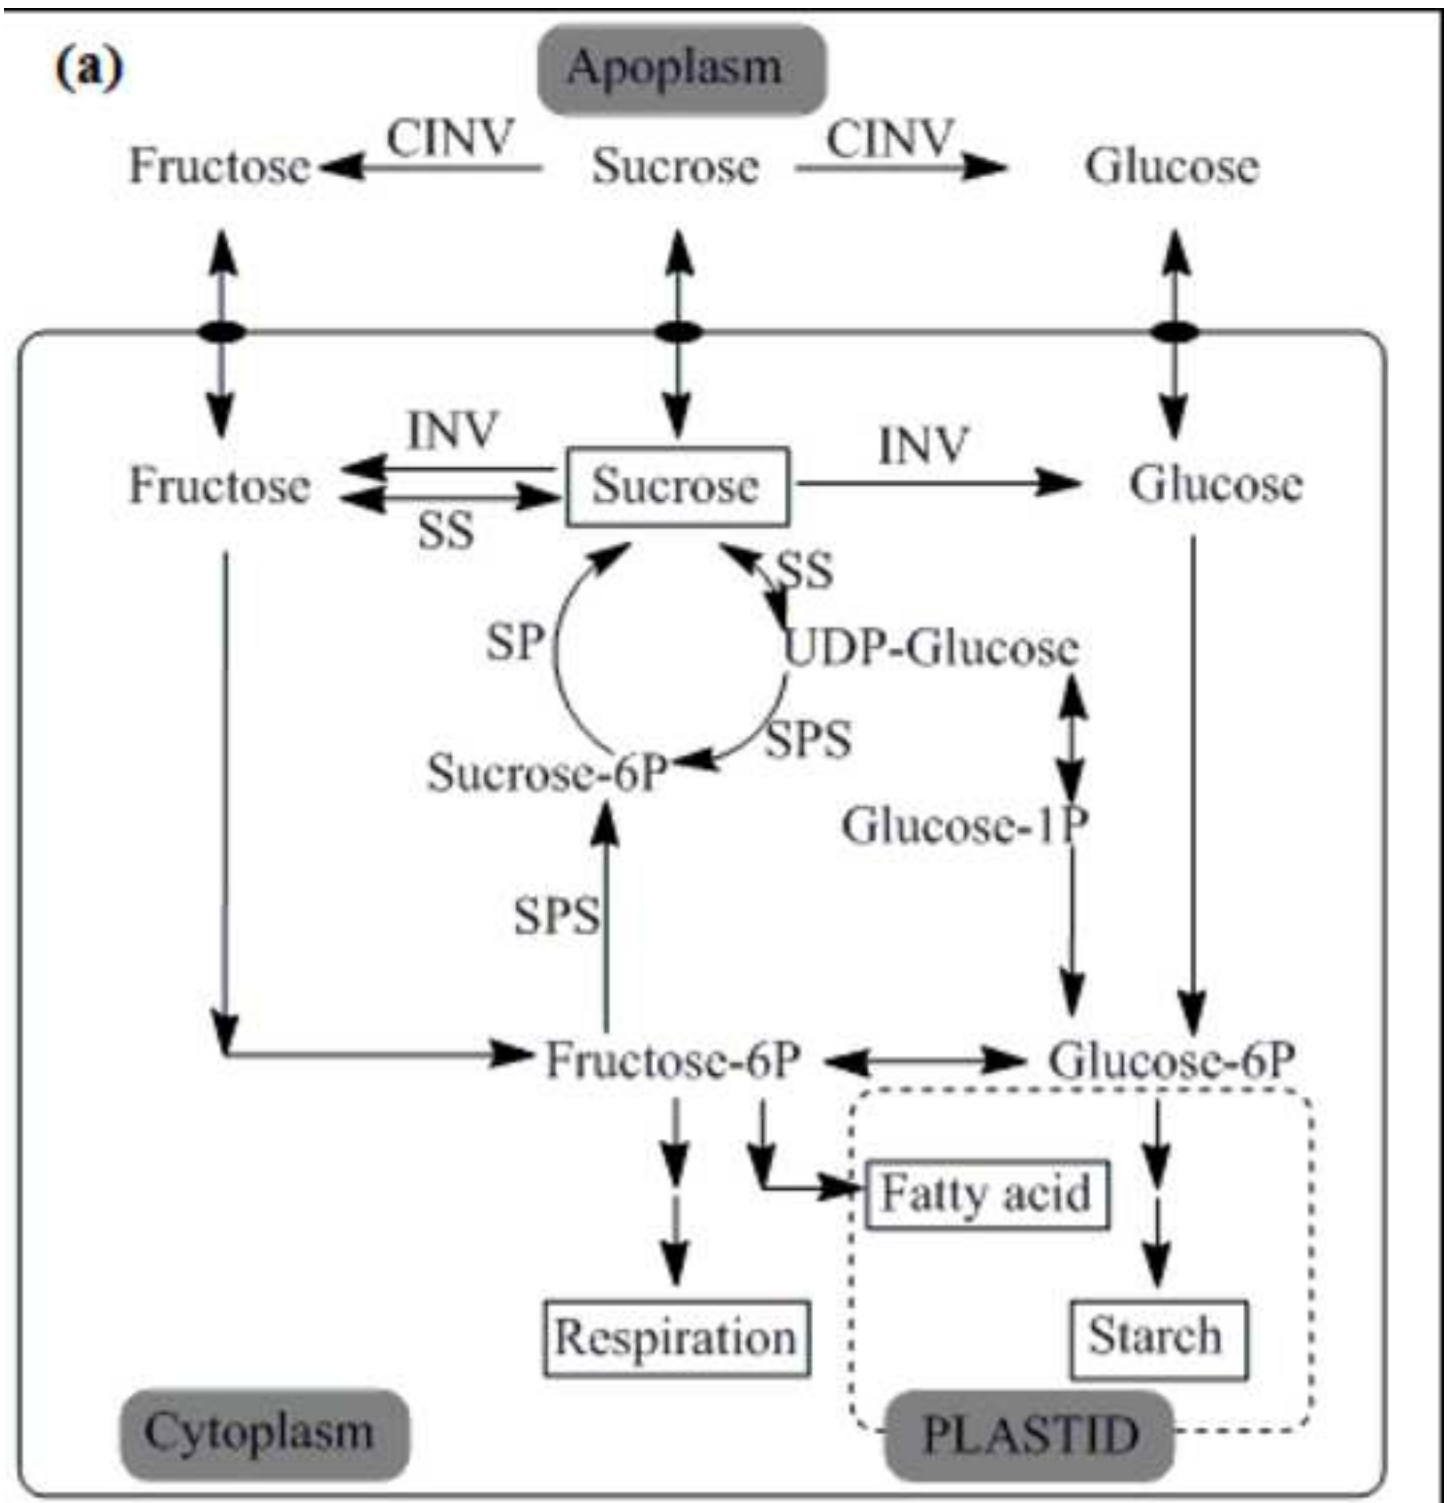

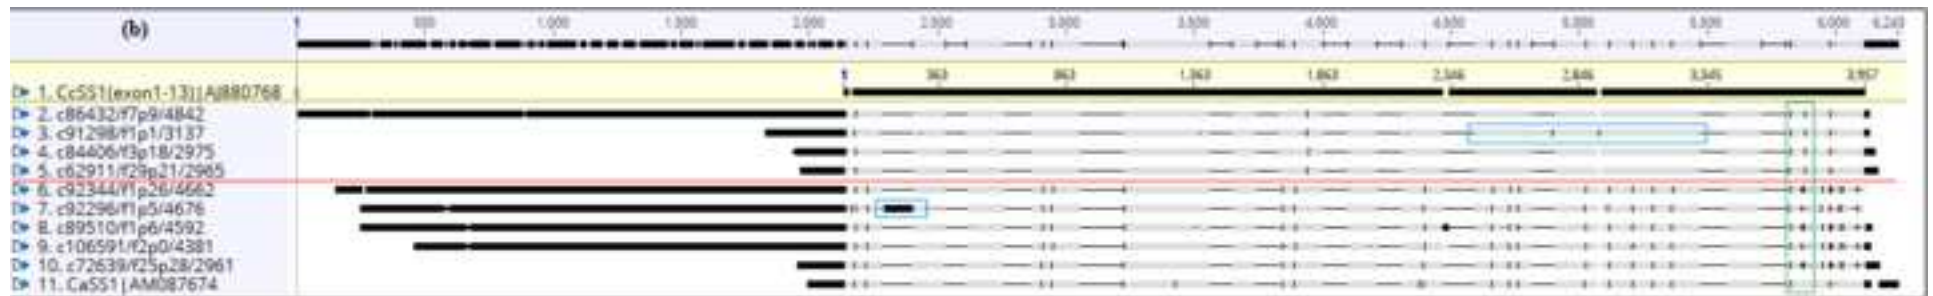





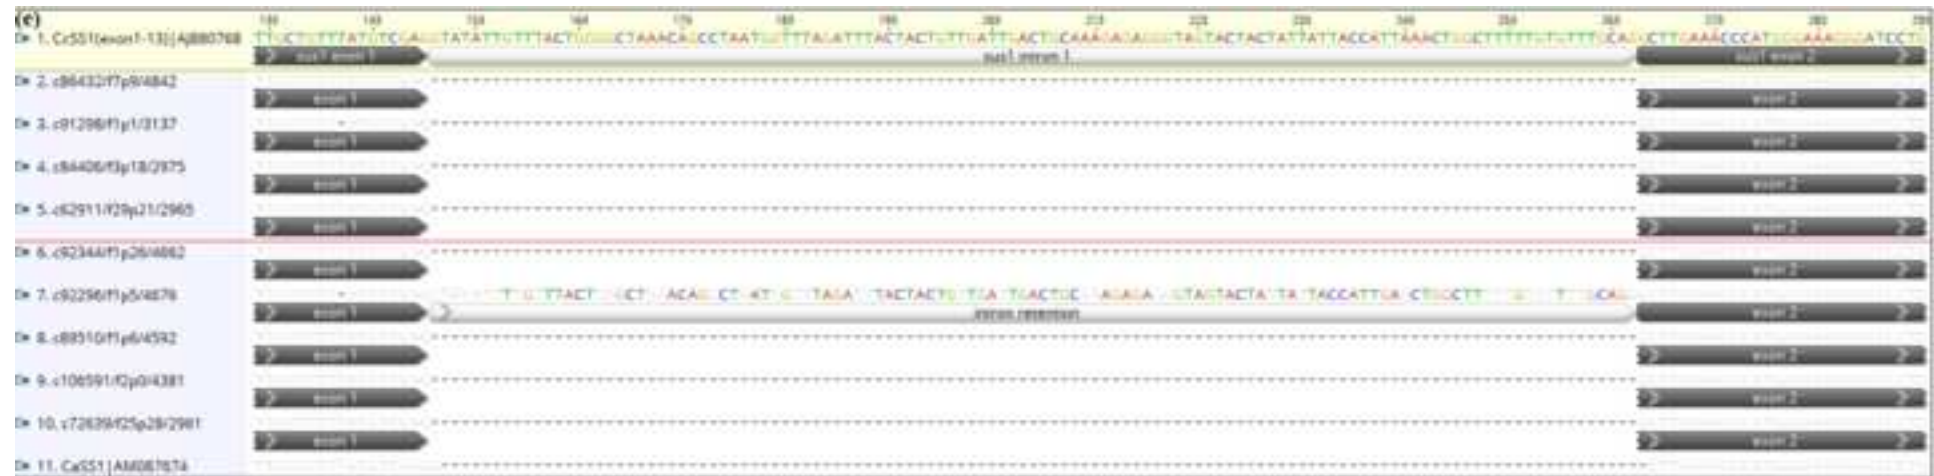

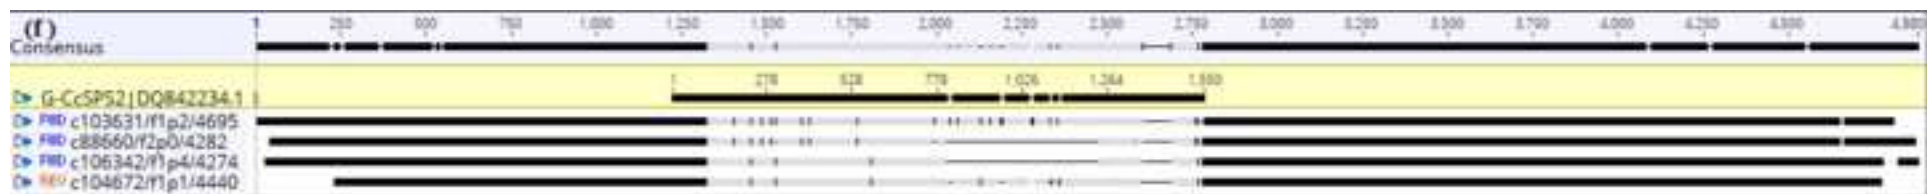

## Distribution of number of sequences with length

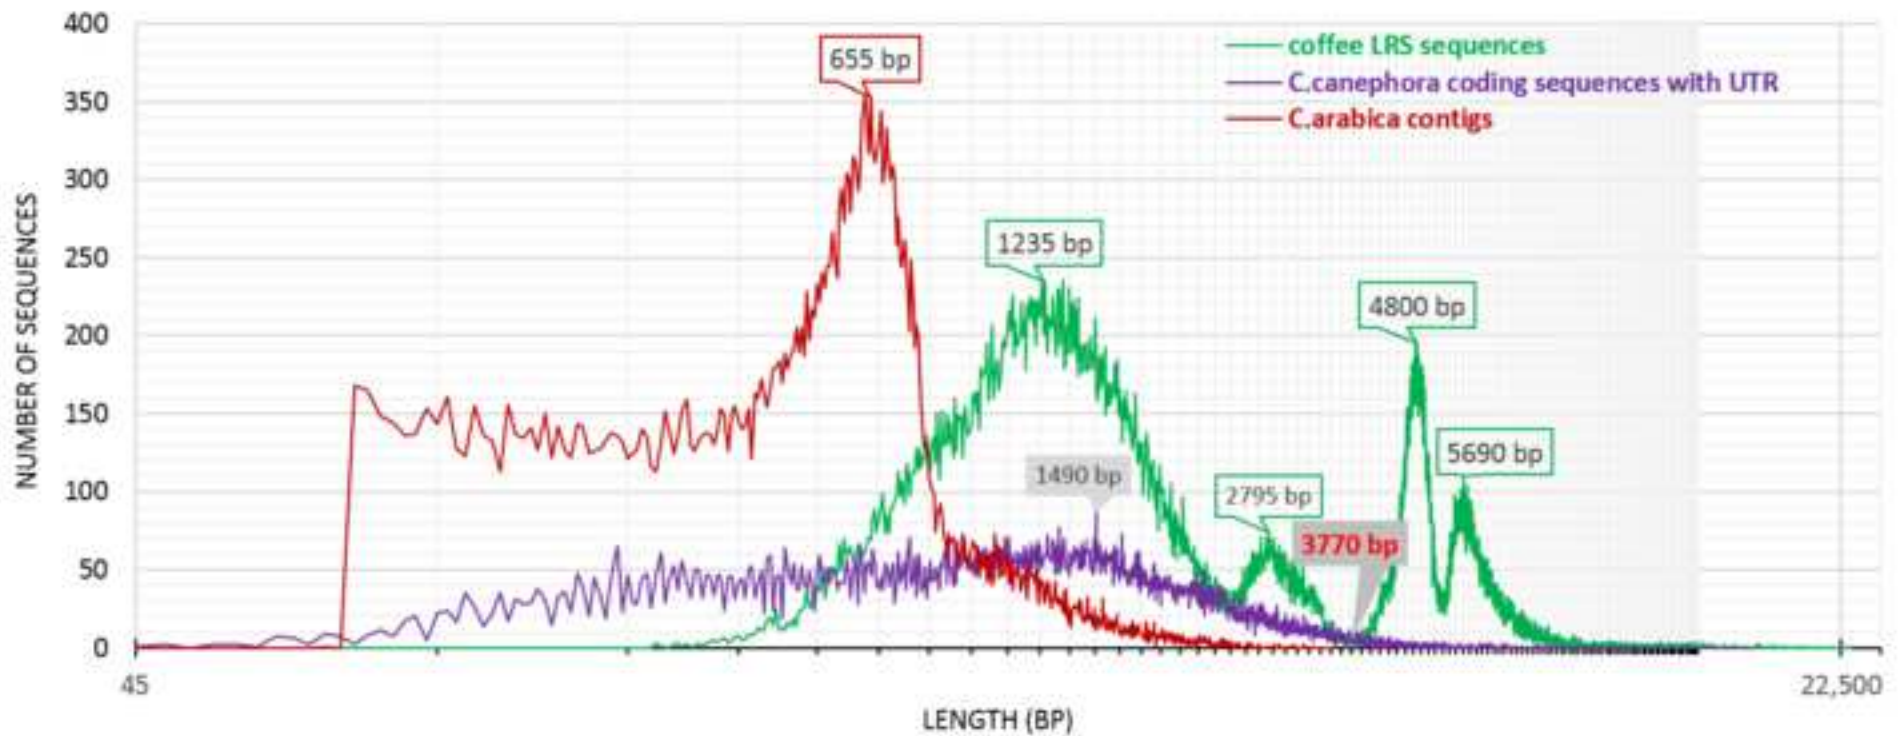

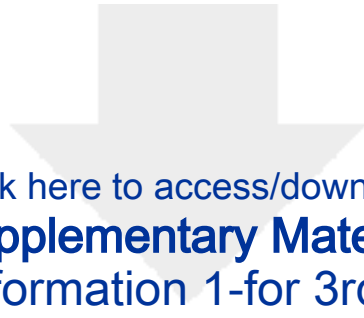

Click here to access/download

**Supplementary Material**

3. supporting information 1-for 3rd submission.pdf

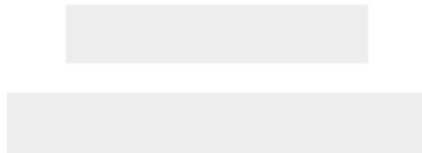

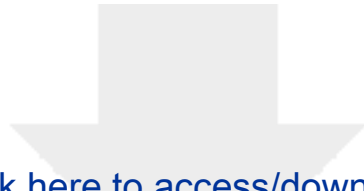

Click here to access/download

**Supplementary Material**

4. supporting information 2-for 3rd submission.xlsx

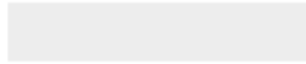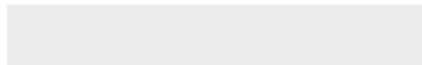

Supplement: gix086_giga-d-17-00024_revision-2.pdf [file gix086_giga-d-17-00024_revision-2.pdf]
