# Supplementary material for: Long-read sequencing of the coffee bean transcriptome reveals the diversity of full-length transcripts
Source: PubMed Central journal article supplement (PMC5737654; doi:10.1093/gigascience/gix086), 2017-08-30

1  
2 **Long-read sequencing of the coffee bean transcriptome reveals the diversity of full-length**  
3 **transcripts**  
4

5 Bing Cheng, Agnelo Furtado, Robert J. Henry<sup>1</sup>  
6

7 Queensland Alliance for Agriculture and Food Innovation, The University of Queensland, St Lucia,  
8 QLD 4072, Australia  
9

10  
11 8  
12  
13 9  
14  
15 10  
16  
17 11  
18  
19 12  
20  
21 13  
22  
23 14  
24  
25 15  
26  
27 16  
28  
29 17  
30  
31 18  
32  
33 19  
34  
35 20  
36  
37 21  
38  
39 22  
40  
41 23  
42  
43 24  
44  
45 25  
46  
47 26  
48  
49 27  
50  
51 28  
52  
53  
54  
55  
56  
57  
58  
59  
60  
61  
62  
63  
64  
65

---

29 **Abstract**

30 **Background:** Polyploidization contributes to the complexity of gene expression resulting in  
31 numerous related but different transcripts. This study explored the transcriptome diversity  
32 and complexity of tetraploid Arabica coffee (*Coffea arabica*) bean. Long-read sequencing  
33 (LRS) by Pacbio Isoform sequencing (Iso-seq) was used to obtain full-length transcripts  
34 without the difficulty and uncertainty of assembly required for reads from short read  
35 technologies. The tetraploid transcriptome was annotated and compared with data from the  
36 sub-genome progenitors. Caffeine and sucrose genes were targeted for case analysis.

37 **Findings:** An isoform-level tetraploid coffee bean reference transcriptome with 95,995  
38 distinct transcripts (average 3,236 bp) was obtained. A total of 88,715 sequences (92.42%)  
39 were annotated with BLASTx against NCBI non-redundant plant proteins, including 34,719  
40 high quality annotations. Further BLASTn to NCBI non-redundant nucleotide sequences, *C.*  
41 *canephora* coding sequences with UTR, *C.arabica* ESTs and Rfam resulted in 1,213  
42 sequences without hits, were potential novel genes in coffee. Longer UTRs were captured,  
43 especially in the 5'UTRs, facilitating the identification of upstream ORFs (uORFs). The LRS  
44 also revealed more and longer transcript variants in key caffeine and sucrose metabolism  
45 genes from this polyploid genome. Long sequences (>10kb) were poorly annotated.

46 **Conclusions:** LRS technology shows the limitation of previous studies. It provides an  
47 important tool to produce a reference transcriptome including more of the diversity of full-  
48 length transcripts to help understand the biology and support the genetic improvement of  
49 polyploid species such as coffee.

50 **Keywords:** coffee, transcriptome, full-length cDNA, long sequences, isoform, polyploid,  
51 UTR

## 52 **Background**

53 Polyploidy creates a complicated transcriptome with diverse transcript isoforms. As an  
54 important evolutionary process in plants, polyploidization generates new species and  
55 increases biodiversity [1]. A balance of genetic and biochemical features is required for the  
56 polyploid to survive while carrying multiple genomes in the same nucleus [2]. Genetic  
57 changes associated with the formation of polyploids include gene function, which may  
58 remain unchanged, or diversification among the multiple homeologs, leading to  
59 neofunctionalization, subfunctionalization, or pseudogenization [3]. Alternative splicing and  
60 polyadenylation also contribute further to the diversity of transcripts [4, 5]. Additionally,  
61 different 5'UTRs account for transcript variation, however, limited information is available  
62 on this for most genes. This diversity may include different functional motifs, like upstream  
63 open reading frames, or introns harboured in this area, influencing post-transcription  
64 expression [6, 7]. All these influences contribute to the diversity and complexity of a  
65 polyploid transcriptome.

66 The transcriptome represents all the genes expressed in the cell or tissue. RNA sequencing  
67 (RNA-Seq) makes it possible to capture the identity of these genes. Generating a reference  
68 transcriptome is essential for studying variation in expression of genes and the influence of  
69 genotype or environment on their expression [8, 9]. Most studies generate a reference  
70 transcriptome by short-read sequencing and reconstruct the transcriptome by the assembly  
71 and/or mapping of reads to other available reference genomes [10-12]. However, this is  
72 difficult for long transcripts, repetitive sequences and transposable elements. It is particularly  
73 challenging for complex polyploid genomes [13]. The LRS technology (e.g. PacBio) has  
74 recently become available and this technology overcomes these difficulties by generating  
75 sequence information for the full length as a single sequence read, including very long  
76 transcripts (*e.g.* those exceeding 10kb) without the need for further assembly. This technique

1  
2  
3  
4  
5  
6  
7  
8  
9  
10  
11  
12  
13  
14  
15  
16  
17  
18  
19  
20  
21  
22  
23  
24  
25  
26  
27  
28  
29  
30  
31  
32  
33  
34  
35  
36  
37  
38  
39  
40  
41  
42  
43  
44  
45  
46  
47  
48  
49  
50  
51  
52  
53  
54  
55  
56  
57  
58  
59  
60  
61  
62  
63  
64  
65

77 has been applied in a few plant studies and provides further information on transcript  
78 diversity, including alternative splicing and alternative polyadenylation [4, 5].  
79 Arabica coffee is a recent allotetraploid ( $2n=4x=44$ ; ~50,000 years old) derived from *C.*  
80 *canephora* and *C. eugenioides*. A high-quality reference genome and annotation are not yet  
81 available for Arabica coffee. However, a draft genome is available for one of the sub-  
82 genomes, *C. canephora* [14]. Arabica coffee is highly regarded by coffee consumers, is of  
83 great economic value and accounts for almost 70% of world coffee traded [15] However, it is  
84 produced in limited high altitude tropical environments and is threatened by climate change.  
85 Understanding the genetic and environmental control of coffee quality will be facilitated by  
86 the availability of detailed knowledge of the transcriptome of the coffee bean. This study  
87 used LRS by Pacbio Iso-seq to characterise the Arabica coffee bean transcriptome including  
88 beans from immature, intermediate and mature stages in order to explore the complex  
89 polyploid system and establish a reference transcriptome for future studies of gene  
90 expression.

## 91 **Data Description**

### 92 *RNA sample preparation*

93 Fruits at different development stages (immature, intermediate and mature fruits) of *Coffea*  
94 *arabica* var. K7 (Supporting Information 1 Fig. S1) were harvested from Green Cauldron  
95 Coffee, Federal, Australia. Five coffee trees were selected randomly and ten coffee fruits  
96 (five fruits from each of the upper and lower canopy of each tree) were collected separately  
97 for each tree and each stage of development. Samples were collected in triplicate. In total,  
98 450 coffee fruits (900 beans) from 15 trees were collected. Once each fruit was harvested, the  
99 pericarp was removed immediately with a scalpel in 20 s or less. The coffee beans were  
100 immediately frozen in liquid nitrogen, transported on dry ice and stored at -80 °C until further

101 use. Total RNA was extracted from coffee fruits as described by Furtado [16]. Equal amounts  
102 of RNA from each of the 90 (3 replicates of 5 trees at 2 levels in the canopy and 3 stages of  
103 development) extractions were combined to provide a representative sample for sequencing  
104 to generate a reference transcriptome. Afterwards, combined RNA was assessed for integrity  
105 using an Agilent RNA 6000 nano kit and chips on a Bioanalyzer 2100 (Agilent Technologies,  
106 California, USA) and processed further for cDNA preparation.

### 107 *cDNA preparation*

108 The Pacbio Iso-seq protocol was used for cDNA preparation. cDNA was synthesised using a  
109 Clontech SMARTer PCR cDNA Synthesis kit (ClonTech, Takara Bio Inc., Shiga, Japan) and  
110 amplified using a KAPA HIFI PCR kit (Kapa Biosystems, Boston, USA). The double-  
111 stranded cDNA was split into two sub-samples. One was used directly for sequencing. The  
112 other set was normalised to equalise transcript abundance and obtain rare sequences.

113 The cDNA was purified for normalisation using a QIAquick PCR Purification Kit (Qiagen).  
114 The purified cDNA was precipitated and normalised with a Trimmer-2 cDNA normalisation  
115 kit (Evrogen, Moscow, Russia). The resulting cDNA was evaluated and quantified using an  
116 Agilent DNA 12000 Kit and Chips on a Bioanalyzer 2100 (Agilent Technologies, California,  
117 USA). The same amount of non-normalized and normalised cDNA was used as input for  
118 Pacbio Iso-seq.

119 Samples were subjected to a Pacbio Iso-Seq protocol through purification, size selection  
120 (Blue Pippin system), re-amplification, SMRTbell template preparation and Iso-seq on a  
121 Pacbio RS II platform. A size selection protocol was applied as smaller cDNAs are more  
122 abundant and would otherwise be preferentially sequenced. Four Bluepippin bins were  
123 selected for non-normalized cDNA sequencing, with size ranges of 0.5-2.5kb, 2-3.5kb, 3-  
124 6.5kb and 5-10kb, respectively since Pacbio sequencing preferentially sequences short DNA

125 fragments. Two bins were selected for normalised cDNA sequencing, 2-3.5kb and 3-6.5kb, as  
126 the normalisation biases against longer sequences.

#### 127 *Raw read processing and error correction*

128 Sequence data was processed through the RS IsoSeq (version 2.3) pipeline [17]. The first step  
129 was to remove adapters and artefacts to generate reads of insert (ROIs) consensus sequences.

130 Short sequences less than 300 bp were removed as the Bluepippin cDNA size selection starts  
131 from 500 bp, where some sequences less than 500 bp have a chance to be sequenced. Non-

132 Chimeric ROIs sequences were filtered into two groups of sequences comprised of full-length

133 ROIs sequences and non-full length ROIs sequences. Full-length (FL) ROIs sequences were

134 identified based on the presence of the 5'-adaptor sequence, the 3' adapter sequences (both

135 used in the library preparation) and poly (A) tail. Further, FL ROIs sequences were passed

136 through the isoform-level clustering (ICE). ROI sequences were used to correct errors

137 (polish) the isoform sequences using the Quiver software module. The polishing process of

138 Quiver generated two isoform sequence files, one with high quality (HQ) isoform sequences

139 and the other with low quality (LQ) isoform sequences corresponding to an expected

140 accuracy of  $\geq 99\%$  or below respectively. LQ output (or non-FL coverage sequences) is

141 useful in some cases, as it may result from rare transcripts or lower coverage sequences. And

142 these low coverage sequences can be further used to correct errors in HQ output. The Primer

143 IIA sequence motifs (used in the library preparation) which escaped removal at the ROIs

144 stage corresponded to 11 sequences were trimmed using CLC genomic workbench 9.0 (CLC,

145 RRID:SCR\_011853; QIAGEN, CLC Bio, Denmark). After combining the HQ and LQ

146 transcripts, further clustering was processed with CD-HIT-EST (c=0.99) [18].

147 In the following step, the contaminant sequences were removed by CLC stepwise as follows

148 [19]. 1) Chloroplast transcript sequences were identified by BLASTn to the *C.arabica*

149 complete chloroplast genome (GenBank: EF044213.1). 2) Mitochondrial transcripts were

150 characterised by BLASTn to *N. tabacum* and *V. vinifera* complete mitochondrial genomes  
151 (BA000042.1 and FM179380.1). 3) Ribosomal sequences were detected by BLASTn to the  
152 reported *C.arabica*, *C.canephora* and *C. eugenoides* ribosomal genes (AJ224846,  
153 EU650386, DQ153609, AF416459, EU650384, EU650385, AF542981, AF542990,  
154 JX459583, JX459584, JX459585, JX459586, JX459587, DQ153593, AF542982, DQ423064,  
155 DQ153588, DQ153621, AF542986). 4) Virus, viroid and prokaryote contaminants were  
156 identified with BLASTn to their reference genomes from the NCBI database (April 4<sup>th</sup>,  
157 2017). Prokaryotic contaminants were screened with available reference genomes from NCBI  
158 (Feb 9<sup>th</sup>, 2017). 5) Fungal sequences were investigated by BLASTn to fungal proteins (April  
159 4<sup>th</sup>, 2017). All the above analyses were processed one after another with a maximum E-value  
160 threshold of 1e-10.

161 From the BLASTn results, significant matches were filtered with a bit score (A)  $\geq 300$  as  
162 well as identity  $\geq 80\%$ . In each step, the filtered significant sequences were processed further  
163 with cloud BLASTn to the NCBI non-redundant database (bit score: B) to further confirm the  
164 matches. This validation step was confirmed by comparison of the bit score (comparison of  
165 value A and B). If the higher bit score was associated with a contaminant sequence in the  
166 BLASTn (A>B), then the sequence was discarded. In total 526 sequences corresponding to  
167 chloroplastic (200), mitochondrial (264), ribosomal (37), viral (0), viroid (0), prokaryotic (0)  
168 and fungal (25) contaminant sequences, respectively, were removed in this process. Sequence  
169 quality was then accessed with the Fasta Statistics through Galaxy /GVL 4.0 (Galaxy,  
170 RRID:SCR\_006281) [20]. This set of Iso-seq processed isoforms was used for further  
171 analysis and hereafter named the “Coffee long read sequencing (coffee-LRS) isoforms” [21].  
172 The term ‘isoforms’, or ‘isoform sequence’ or ‘transcript’ used in this study represent  
173 individual sequences from the coffee-LRS isoforms, while “transcript variants” indicate  
174 different transcript of a gene, including alternative spliced variants, homeologs, etc.

175 *Transcriptome annotation*

176 A number of databases were used for annotation of the coffee-LRS isoforms described as  
177 follows [22]. 1) The plant Geninfo identifier (GI) list was downloaded from NCBI Protein  
178 Entrez (May 2<sup>nd</sup>, 2017, 8,431,379 items). The plant proteins were retrieved from the NR  
179 database using this GI list, yielding 5,099,147 sequences (NR-plant). Then, the full set of the  
180 coffee-LRS isoforms was submitted to stand-alone BLASTx against the NR database below  
181 1e-10. 2) Sequences without hits from step 1 were submitted further to NCBI non-redundant  
182 nucleotide sequences (NT, May 5<sup>th</sup>, 2017) BLASTn at 1e-10. 3) Sequences without a hit from  
183 step 2 were processed further with BLASTn (1e-20) to *C. canephora* coding sequences  
184 (CDS) with UTR and *C. arabica* EST database [23, 24]. 4) The output of BLASTx was  
185 filtered with query coverage (Qcovs), cumulative identity (ID) and sequence length into three  
186 categories, high, medium and low quality annotation. Query coverage indicates the input  
187 coffee-LRS isoforms covered by the matched sequences. Cumulative identity represents the  
188 identity length to the aligned length (AL). ID can be expressed as the ratio of the sum of  
189 identity length to the sum of the aligned length of all the Hsps (High-scoring Segment Pairs)  
190 of a subject. The four databases above, NR plant, NT, *C. canephora* CDS with UTR and *C.*  
191 *arabica* EST database, are named as FOUR databases in this manuscript. Finally, all the  
192 BLASTx and BLASTn results were processed by function annotation with BLAST2GO  
193 (Blast2GO, RRID:SCR\_005828).

194 The Blast2GO Pro 4.0 (North America, US: USA2 Version: b2g\_Sep 16) pipeline was based  
195 on default settings [25]. InterProScan /IPS (InterProScan, RRID:SCR\_005829) was used to  
196 search sequence protein domains from EBI databases to improve annotation (North America,  
197 US: USA2, Version: b2g\_Sep 16). In the follow-up phase, Blast2GO Mapping, Annotation  
198 and Annex functions were applied to retrieve GO (gene ontology) terms, select reliable  
199 annotations and increase the number of annotated isoforms respectively. The GO-slim tool



1  
2  
3  
4  
5  
6  
7  
8  
9  
10  
11  
12  
13  
14  
15  
16  
17  
18  
19  
20  
21  
22  
23  
24  
25  
26  
27  
28  
29  
30  
31  
32  
33  
34  
35  
36  
37  
38  
39  
40  
41  
42  
43  
44  
45  
46  
47  
48  
49  
50  
51  
52  
53  
54  
55  
56  
57  
58  
59  
60  
61  
62  
63  
64  
65

200 was used against the plant database to provide plant generic GOs. Finally, GO enzyme  
201 mapping and KEGG (Kyoto encyclopaedia of genes and genomes; RRID:SCR\_012773)  
202 pathway maps were loaded.

### 203 *Case studies with the caffeine and sucrose genes*

204 Two case studies were performed with genes encoding caffeine and sucrose biosynthesis  
205 pathway (caffeine and sucrose genes) to investigate specifically the quality, advantage and  
206 additional potential of the coffee-LRS isoforms. Reported coffee caffeine and sucrose  
207 candidate genes were downloaded from the European Nucleotide Archive (EMBL-EBI)  
208 (Table 3 and Table 4).

209 For potential caffeine candidate genes, coffee-LRS isoforms were processed with BLASTn  
210 (1e-20) against the reported caffeine genes. Sequences with hits to the reported caffeine genes  
211 were submitted to BLASTx (1e-20) with the NR database to confirm whether they were  
212 caffeine genes (higher bit score). Confirmed transcripts (potential caffeine isoforms) and  
213 sucrose isoforms annotated by Blast2GO (potential sucrose transcripts) were further  
214 evaluated with Geneious 10.0.4 (Geneious, RRID:SCR\_010519) by aligning back to the  
215 reported candidate genes in allele level [26]. Motif analysis was conducted with default  
216 parameters except for “ten motifs” selected with MEME 4.11.2 [27]. UTRscan was used for  
217 UTR functional motifs annotation [28].

### 218 *Comparison to other available coffee databases*

219 To compare with available coffee sequences, the full coffee-LRS isoforms were processed  
220 with BLASTn (1e-20) to *C.canephora* CDS with UTR and *C. arabica EST database*,  
221 respectively and the other way around [23, 24]. The *C. eugenioides* transcriptome (young  
222 leaves and mature fruits) from Illumina was also used in the comparison [29].

223 *Novel genes*

224 Coffee-LRS isoforms without hits to the FOUR databases were submitted to the Rfam  
225 (Rfam, RRID:SCR\_007891) database by Blast2GO Pro package for non-coding RNA  
226 analysis [30]. Sequences without hits to Rfam were probably novel genes in coffee.

227 *Analysis of long sequences*

228 In order to explore the advantage of using the LRS PacBio platform to obtain long sequences,  
229 the BLASTx and BLAST2GO functional annotation result for the coffee-LRS isoforms  
230 longer than 10kb were extracted from the total dataset.

231 **Analyses**

232 *Overview of full-Length RNA molecules from long-read sequencing*

233 A total of 2,618,905 raw reads were generated from LRS platform, which yielded 443,877  
234 reads of insert. After 8,842 short sequences (less than 300 bp) were removed, 233,464 full-  
235 length (FL) and 201,571 non-full-length (NFL) reads were generated. The individual  
236 isoforms were sequenced in average five times. In total, 95,995 coffee-LRS isoforms were  
237 recovered after sequences representing chloroplast, mitochondrial and ribosomal transcripts  
238 were removed (Table 1). The length of the sequences in this dataset ranged from 301 bp to  
239 23,335 bp, with an average length of 3,236 bp. The GC content was 41.4% and the N50 was  
240 4,865 bp.

241 The BLASTx output (against NR plant) was divided into three groups, high, medium and low  
242 quality based on Qcovs, ID and sequence length (Data description and Table 2). There were  
243 34,719 (high), 13,655 (medium) and 40,314 (low) sequences were grouped into each quality  
244 groups, respectively (supporting information 1 Table S1). Thereafter, 7,280 sequences  
245 without hits were processed with BLASTn to NT database and resulting in 1,981 sequences  
246 with hits. A total of 5,299 sequences without a hit were further accessed with *C. canephora*

247 CDS and UTR and *C.arabica* contigs. Finally, there were 1,217 sequences with no hits to any  
248 of the above databases (FOUR databases).

#### 249 *Functional Annotation*

250 Functional annotation of the coffee-LRS isoforms was investigated using different databases.

251 The data in Table 2 shows that 88,715 sequences (92.42%) had hits to NR plant proteins. A

252 total of 70,774 sequences (73.73%) matched to IPS protein domains with 33,605 IPS GOs

253 (35.01%). A number of 78,571 sequences (81.85%) had identified GOs. After the GOs were

254 merged, GOs of 58,050 sequences (60.47%) matched with GO-slim (plant).

255 Of all the hits to the NR plant proteins from BLASTx, the coffee-LRS isoforms (maximum

256 50 hits to each sequences) had the highest number of hits to the *Nicotiana tabacum* (tobacco,

257 174,6308 hits), followed by *C. canephora* (142,656 hits), *Vitis Vinifera* (grape, 134,025 hits)

258 and *Theobroma cacao* (cacao, 132,336 hits) proteins (supporting information 1 Figure S1).

259 Most hits found in tobacco were probably because the tobacco database is more extensive and

260 well annotated than those of other related species, like *C. canephora*. For top-hit species,

261 there is no doubt the majority of the sequences has top-hit with the progenitor, *C.canephora*

262 (73,587 sequences), followed by *Sesamum idicum* (1,321 sequences), *Nicotiana tabacum*

263 (767 sequences), etc. (supporting information Figure S2). The NR-plant database consists of

264 few proteins sequences from *Coffea arabica* as reflected by just 485 protein sequence hits and

265 is ranked seventh in the top-species hit list. This indicates the limit information on *Coffea*

266 *arabica*. Of the 33,512 sequences (34.91%) with IPS GOs, cytochrome P450 (IPR001128,

267 353 matches) had the most sequence matches among the IPS families (supporting information

268 1 Fig. S3).

269 Biological process (BP, 56,230 sequences) was more abundant than cellular component (CC,

270 44,528 sequences) and molecular function (MF, 45,604 sequences) (supporting information 1

271 Fig. S4). Within these functional groups, the highest number of sequences were annotated  
272 with the biosynthetic process (11,627 sequences, 20.68%), membrane component (21,175  
273 sequences, 47.55%) and transferase activity (11,921 sequences, 26.14%). A total of 156  
274 pathways with 921 enzymes were annotated by KEGG, associated with 11.97% of the whole  
275 dataset (11,489 sequences). Among these, starch and sucrose metabolism ranked as the fifth  
276 most abundant pathways, with 36 encoding enzymes and 766 isoforms annotated (supporting  
277 information 1 Fig. S5). The average number of coffee LRS isoforms encoding the 921  
278 enzymes was 18 while the highest number was found in phosphatase (EC: 3.6.1.15, 2,969  
279 sequences), encoding the purine metabolism and thiamine metabolism pathway. In  
280 comparison, only 802 sequences were associated with 142 pathways and 374 enzymes in *C.*  
281 *eugenioides* transcriptome and starch and sucrose pathway relating to 450 contigs was the  
282 most encoded pathway [29].

283 The candidate genes for the major caffeine candidate genes were not identified by KEGG  
284 pathway. To evaluate the annotated isoforms and their diversity, further analysis was  
285 performed with caffeine pathway. The sucrose pathway was also analysed as a case study as  
286 sucrose candidate genes were relatively long and highly diverse. Both of these pathways are  
287 important for the understanding of coffee quality [31].

#### 288 *Case study I: Isoform diversity in the caffeine biosynthesis pathway*

289 The caffeine pathway has been widely studied previously (Fig. 2a). Candidate genes and  
290 complete coding sequences of both transcripts and genomic DNA are available in public  
291 databases and can be used as well-established references for caffeine candidate gene analysis  
292 (Table 3). From the BLASTn output, 25 long-read transcripts were annotated and related to  
293 candidate caffeine genes [21]. Further alignment suggests ten high quality isoforms were  
294 likely to be putative caffeine genes, including three transcript variants of *XMT1*, one of  
295 *MXMT1*, one of *MXMT2* together with two of *DXMT1* and three of *DXMT2*. All genes

296 encoding caffeine the primary pathway except the *XMT2* gene were present in this bean  
297 transcriptome (Fig. 2 and Table 3). The length distribution of these isoforms ranged between  
298 977 and 1,517bp.

299 Importantly, all ten isoforms were extended at the 5' UTR region compared to the  
300 corresponding sequences reported in Arabica and Robusta coffee (Table 3), while eight  
301 isoforms were longer at the 3' end (Fig. 2b, 2c, 2e and supporting information 2 Fig. S6). The  
302 most extended isoform (c695597/f1p2/1421) was 136 bp longer than the previously reported  
303 candidate genes (*CaXMT1*, Fig. 2b). Nine isoforms were found to be longer than the reported  
304 genomic DNA sequences. The other isoform was likely to have resulted from an alternative  
305 polyadenylation event (c25904/f2p0/977, Fig. 2c) as two potential polyadenylation signals  
306 (AAUAAA) were identified in the 3' UTR (Fig 2d). Alternative splicing was also presented  
307 in caffeine isoforms, for example, intron retention was detected in one of the putative *DXMT2*  
308 isoforms (Fig. 2e).

309 Coffee LRS isoforms encoding *XMT1* (Fig 2b), *MXMT1* (supporting information Fig. S6)  
310 and *DXMT2* (Fig 2c, 2e) were better aligned to the corresponding *C.canephora* isoforms,  
311 individually (higher identity, Fig. 2 and supporting information Fig. S6). This indicates these  
312 transcript variants were potentially *C.canephora* sub-genome copies. In contrast, isoforms  
313 encoding *XMT2* (Fig 2c), *MXMT2* (supporting information Fig. S6) and *DXMT1* (Fig 2c,  
314 2e) were poorly aligned with *C. canephora* isoforms (more variants) and were probably  
315 *C.eugenioides* sub-genome copies.

#### 316 *Case study II: Long sucrose isoforms provide insight into the complexity of the polyploid* 317 *system*

318 Sucrose genes were used to investigate the transcriptome sequence diversity of the polyploidy  
319 system. For the sucrose synthase 1 gene (*SSI*), one of the important genes in the sucrose  
320 metabolism, nine transcript variants were identified (Fig. 3, Table 4 and Fig. 4a). Compared

321 to c86432/f7p9/4842, the other eight transcript variants varied in motif replacement (motif 7  
322 replaced motif 9 in c106591/f2p0/4381), deletion (for example c92344/f1p26/4662) and  
323 relocation (intron retention, c92296/f1p5/4676 and c91298/f1p1/3137), etc. (Fig. 4b). The  
324 length of these nine putative *SSI* transcript variants ranged from 2,961 to 4,842 bp.

325 Importantly, all the sucrose transcript variants studied in this research were extended in the  
326 5'UTR region relative to previous reports, except for *SPSI*, c51110/f2p0/3136 (Table 4).

327 Some transcript variants, such as the longest putative *SSI* sequence identified,  
328 c86432/f2p7/4842 (4,842 bp), extended 2,131 bp upstream of the *C.canephora* coding  
329 sequence (*G-CcSSI*) and 1,994 bp upstream of the Arabica sucrose synthase 1 mRNA coding  
330 sequence (*CaSSI*). The length of the 5' leading region of the *SSI* transcript variants ranged  
331 between 218 and 2,131 bp (Table 5). To understand the diversity in this region, the 5' leading  
332 sequences of the nine putative *SSI* transcript variants were scanned using the UTRdb online  
333 server. A maximum of 12 upstream open reading frames (uORFs) were identified and the  
334 number was positively correlated with the length of the sequences. No uORFs were identified  
335 in the two transcript variants with short 5'UTR, c62911/f29p21/2965 (218 bp leader  
336 sequence) and c72639/f25p28/2961 (232 bp leader sequence).

337 The nine *SSI* transcript variants revealed transcript diversity that resulted largely from  
338 different copies from the progenitors. When aligned to *G-CcSSI* (*C. canephora SSI* genomic  
339 sequence), the top four putative *SSI* transcript variants showed high identity and consistent  
340 nucleotide variants (like the guanine highlighted at 3,726 bp in the consensus sequence, Fig.  
341 4c), suggesting that these were copies from the *C. canephora* sub-genome. For example,  
342 compared to the consensus sequence, the same indels were present in 3,707bp and 3,733bp, a  
343 cytosine at 3,713bp and guanine at 3,715bp, etc. Consistently, the sequence of intron  
344 retention in one of the top four sequences, c91298/f1/p1/3137 (Fig. 4d) shows high homology  
345 to the intron sequence of *C. canephora*. However, the bottom five transcript variants had a

1  
2  
3  
4  
5  
6  
7  
8  
9  
10  
11  
12  
13  
14  
15  
16  
17  
18  
19  
20  
21  
22  
23  
24  
25  
26  
27  
28  
29  
30  
31  
32  
33  
34  
35  
36  
37  
38  
39  
40  
41  
42  
43  
44  
45  
46  
47  
48  
49  
50  
51  
52  
53  
54  
55  
56  
57  
58  
59  
60  
61  
62  
63  
64  
65

346 higher number of variations compared to *G-CcSSI* that are likely to be *C. eugenioides* sub-  
347 genome derived copies. The lower five transcripts had lots of variations compared to  
348 *C.canephora* intron 10, further indicating this group was from a different copy, probably *C.*  
349 *eugenioides* (Fig. 4e). Additionally, some alleles of *G-CcSSI* were common in nine putative  
350 Arabica *SSI* transcript variants and Arabica sucrose synthase 1(*CaSSI*), such as the variant at  
351 3,666 bp (Fig. 4e). This type of allele probably results from different genotypes. Polyploid  
352 expression patterns were also observed in *SPI* transcript variants, the top two alignments  
353 were similar to *C.canephora* and the other two were slightly different but related. All of the  
354 four transcript variants were longer in the upstream sequences while three extended further  
355 downstream than had previously been reported.

356 Another essential potential of LRS is to explore sequences not yet complete or published. For  
357 instance, four transcript variants were identified from this research while *SPS2* has only been  
358 identified in *C. canephora* rather than *C. arabica* (Fig. 4f).

#### 359 *Comparison to other available coffee databases*

360 To understand the advantage and the diversity of this polyploid coffee transcriptome, a  
361 comparison was made with the available coffee database. More than twice the number of  
362 isoforms were identified in the tetraploid Arabica LRS transcriptome (immature, intermediate  
363 and mature fruits) compared with the *C. eugenioides* contigs (36,935 de novo assembled  
364 contigs, average length: 701 bp, from immature leaves and mature fruits), *C.canephora* CDS  
365 with UTR (25,570 sequences, from a variety of tissues, including fruits) and *C. arabica* EST  
366 database (35,153 contigs, including fruits) (Table 2) [14, 23, 29]. The coffee-LRS isoforms  
367 show greater transcript length, diversity and a lower GC content. The N50 of the Pacbio  
368 dataset (4,865 bp) was more than three times longer and the average length was more than  
369 twice that of the other databases. The sequence distribution of *C.arabica* contigs peaks at 655

370 bp while *C.canephora* CDS with UTR reaches the largest number of sequences at 1,490 bp  
371 (Fig 5). Most of the sequences from the *C. canephora* CDS with UTR and the *C. arabica*  
372 EST database were less than 3,770 bp. By comparison, 39,917 coffee LRS isoforms (41.6%)  
373 were longer than 3,770 bp  
374 Results of the BLASTn analysis indicated that of the 95,995 coffee-LRS isoforms, 9,308  
375 (9.7%) had no matches to the *C.canephora* CDS with UTR while 3,682 (3.8%) isoforms had  
376 no hits to the *C.arabica* contigs. This indicates coffee-LRS isoforms are very diverse  
377 compared to these two databases. Conversely, 9,167 (26.1%) of *C.canephora* CDS with UTR  
378 and 4,830 (18.9%) of *C.arabica* contigs had no hits to the coffee-LRS isoforms. These two  
379 sets of sequences without hits are probably sequences from leaf or other tissues not expressed  
380 in the tissues investigated in this study.

#### 381 *Novel genes*

382 The 1,217 sequences without hits to the FOUR databases (NR plant proteins, NT database, *C.*  
383 *canephora* CDS with UTR and *C. arabica* EST database) were submitted to the Rfam server  
384 to predict non-coding RNAs (ncRNA). The four isoforms that matched were in three  
385 biotypes, two transcripts were identified as CD-box snoRNA, one as HACA-box snoRNA  
386 and the other one as a miRNA (supporting information Table S2). Other than these, the other  
387 1,213 sequences had no hit to the FOUR databases and Rfam are likely to be novel genes that  
388 have not been discovered in coffee or contaminants from other organisms with no sequence  
389 information to date [21]. Length distribution of this new dataset ranged from 325 to 19,189  
390 bp.

#### 391 *Long transcripts*

392 In order to assess the value of LRS in discovering long sequences, 577 transcripts longer than  
393 10 kb were further analysed. Functional annotation of this extremely long dataset shows the



1  
2  
3  
4  
5  
6  
7  
8  
9  
10  
11  
12  
13  
14  
15  
16  
17  
18  
19  
20  
21  
22  
23  
24  
25  
26  
27  
28  
29  
30  
31  
32  
33  
34  
35  
36  
37  
38  
39  
40  
41  
42  
43  
44  
45  
46  
47  
48  
49  
50  
51  
52  
53  
54  
55  
56  
57  
58  
59  
60  
61  
62  
63  
64  
65

394 majority of the sequences (564 sequences, 97.8%) matched to the FOUR databases [21]. The  
395 HSP/Hit coverage distribution was relatively evenly distributed from 0 to 100% compared to  
396 the HSP/Seq coverage. In parallel, the majority of sequences distributed less than 50%  
397 HSP/Seq coverage and peaked at 6%, representing limited information of long sequences in  
398 the NR database. IPS matches were found for 352 sequences (61.0%) while 61 of them had  
399 IPS GOs. A total of 446 sequences (77.3%) were retrieved with GO terms, while 201  
400 isoforms (34.8%) from these were also annotated with GO-Slim.

401 In total, 144 sequences were classified into the biological process, with 92 sequences into  
402 cellular component and 79 into molecular function (supporting information Table Fig. S7).

403 Among them, biosynthetic process (31 sequences), member (43 sequences) and hydrolase  
404 activity (25 sequences) were the top groups, separately, from the three functional process.

405 Among the annotated isoforms, 18 sequences encoding 12 enzymes from 13 pathways were  
406 annotated with a KEGG pathway. The starch and sucrose metabolism ranking the third most  
407 encoded pathway with two isoforms encoding two enzymes.

## 408 **Discussion**

409 Full-length transcripts generated by LRS in this study provided an isoform level polyploid  
410 coffee bean reference transcriptome. Compared to its sub-genome progenitors, the Arabica  
411 coffee bean transcriptome was more diverse and complicated with more isoforms, enzymes  
412 and pathways. Case studies in caffeine and sucrose identified that this diversity and  
413 complexity were a result of alternative splicing, polyadenylation, 5'UTR extension and sub-  
414 genome copies. Discovery of novel genes and long transcripts was also an advantage of using  
415 the LRS technology.

416 *Polyploid expression*

1  
2 417 Different transcript variants may vary in function within the cell and be differentially  
3  
4  
5 418 expressed in tissues or environmental conditions. The abundance of variants in the Arabica  
6  
7 419 transcriptome and case studies of caffeine and sucrose genes compared to the sub-genome  
8  
9 420 progenitors clearly shows the complexity of the polyploid expression.

11  
12  
13 421 Generally, polyploidy results in three main expression patterns of non-additive expression,  
14  
15 422 dominant expression in which total gene expression in the hybrid is similar to one of the  
16  
17 423 parents, transgressive expression compared to the progenitors or unequal homeolog  
18  
19  
20 424 expression [1]. Previously, it was proposed in coffee that the lower caffeine in Arabica coffee  
21  
22 425 was due to the *C. eugenoides* sub-genome attributes. Based on phylogenetic analysis,  
23  
24  
25 426 CaXMT1, CaMXMT1 and CaDXMT2 were believed to be from the *C. canephora* sub-  
26  
27 427 genome while CaXMT2, CaMXMT2 and CaDXMT1 were from the *C. eugenoides* sub-  
28  
29  
30 428 genome[32]. *C. eugenoides* has a very low caffeine biosynthesis together with a rapid  
31  
32 429 catabolism [33]. The expression of sub-genome copies from *C. eugenoides* suggested lower  
33  
34  
35 430 caffeine in Arabica coffee compared to Robusta coffee. This study supports this hypothesis of  
36  
37 431 transcript variants from sub-genome copies controlling the trait.

38  
39  
40 432 Using the LRS isoforms, further studies are now possible at the isoform level (this study was  
41  
42  
43 433 at the transcript variant level) to understand sub-genome gene expression in the polyploid *C*  
44  
45 434 *arabica*. First, it will be possible to determine directly whether the expression of Arabica  
46  
47 435 caffeine genes follows a non-additive expression pattern. Secondly, it would be interesting to  
48  
49  
50 436 determine the reason for more transcript variants identified changes in differential expression  
51  
52 437 in tissues and at development stages. Thirdly, it will be possible to determine whether this  
53  
54  
55 438 expression pattern is influenced by environment, influencing coffee quality. Fourth, whether  
56  
57 439 these different gene expression patterns result in different phenotypes. Similar analysis could  
58  
59  
60 440 be applied to many other genes or pathways of interest. Isoforms and transcript variants

1  
2  
3  
4  
5  
6  
7  
8  
9  
10  
11  
12  
13  
14  
15  
16  
17  
18  
19  
20  
21  
22  
23  
24  
25  
26  
27  
28  
29  
30  
31  
441 found in LRS tetraploid Arabica coffee bean transcriptome in this study were assigned to a  
442 number of functional groups, pathways and to specific enzyme functions. Arabica is believed  
443 to be more adaptive to temperature change than its diploid parents [34]. This study may also  
444 help elucidate the genetic basis of the higher sucrose in Arabica coffee. More generally, the  
445 complete polyploid transcriptome from this study will improve our understanding of the  
446 evolutionary adaptation and plasticity of polyploid species. However, further improvement is  
447 still needed in LRS technologies to improve the sequencing depth. Candidate genes in the  
448 caffeine pathway are reported to be expressed at low levels in fruits compared to leaves,  
449 especially XMT2 (detected by quantitative RT-PCR) [32]. Transcripts were not detected in this  
450 study probably due to low expression of XMT2 and the PacBio iso-seq technology not being  
451 sensitive enough to capture these transcripts. This is likely to happen in the case of other  
452 isoforms expressed at low levels that may not be captured by the Iso-Seq technology even  
453 after application of the cDNA library normalisation step, as was applied in this study.

#### 32 454 *5'UTR extension*

33  
34  
35  
36  
37  
38  
39  
40  
41  
42  
43  
44  
45  
46  
47  
48  
49  
50  
51  
52  
53  
54  
55  
56  
57  
58  
59  
60  
61  
62  
63  
64  
65  
455 Full-length transcripts captured in this study show the advantage of LRS. All the caffeine and  
456 sucrose isoforms annotated in this study, except for *SPS1*, were extended in the 5'UTR  
457 compared to those available from public databases. Previously, it was difficult to sequence  
458 the 5' end as cDNA library preparation starts from the 3' end and normally fails to reach the  
459 5' end. Further, it was not easy to assemble the non-coding parts of transcripts as limited  
460 cDNA sequence was available to guide the assembly and confirm the contigs obtained.  
461 Therefore, less information is available on the 5'UTRs, especially for plants. Generally, the  
462 length of the 5'UTR ranges from 100 up to a few thousand bp [35]. This length difference is  
463 proposed because of the complex gene regulation maintained in eukaryotes [36]. Few post-  
464 transcriptional mechanisms have been studied in 5'UTRs, including the regulation by the pre-  
465 initiation complex and uORF re-initiation.

1  
2  
3  
4  
5  
6  
7  
8  
9  
10  
11  
12  
13  
14  
15  
16  
17  
18  
19  
20  
21  
22  
23  
24  
25  
26  
27  
28  
29  
30  
31  
32  
33  
34  
35  
36  
37  
38  
39  
40  
41  
42  
43  
44  
45  
46  
47  
48  
49  
50  
51  
52  
53  
54  
55  
56  
57  
58  
59  
60  
61  
62  
63  
64  
65

466 uORFs are common in 5'UTRs that have critical regulation. They contain their own set of  
467 start and stop codons that can be scanned by ribosomes and translated. This regulation can  
468 inhibit translation of the main ORF transcript and reduce the amount of protein translated.  
469 Regulation of re-initiation of uORF translation was found to be associated with the length of  
470 sequence between the uORF and the main ORF, suggesting interactions with translation  
471 factors are required before initiation of translation [37]. This was also shown to be influenced  
472 by stress conditions [37]. However, not all uORF may have a role in translation control. In  
473 the leucine zipper transcription factor (*bZIP*) 11 gene, for example, harbouring four uORFs,  
474 only uORF2 was required for this regulation and this uORF is relatively conserved [38].  
475 Other types of 5'UTR regulation may also be found such as that due to introns in the 5'UTRs.  
476 This happens to approximately 35% of human genes [6].  
477 Understanding the mechanism of 5'UTR regulation will be greatly facilitated by the use of  
478 the full-length transcripts. In this study, multiple uORFs were characterised in the *SSI* 5'  
479 UTR and these may contribute to diverse functions and regulation that may be influenced by  
480 stress conditions. Climate change is a threat to Arabica coffee, which grows at high altitude.  
481 It may be possible to influence 5'UTR regulation in Arabica coffee and have the potential to  
482 influence coffee quality. To confirm this, further phenotype, proteome and metabolome  
483 studies are required.

#### 484 *Long transcripts*

485 LRS also has potential in discovering long transcripts, such as the sucrose synthase genes  
486 annotated here. Even though numerous studies have defined the sucrose pathways, not all the  
487 candidate genes have been identified. Many sucrose metabolism genes are too long to be  
488 captured by short read sequencing without significant *de novo* assembly. For example, the *C.*  
489 *arabica* *SS2* coding sequence is 2,889 bp and the genomic DNA sequence (exon 1 to 15) is  
490 5,672 bp (Table 4). Sucrose synthase genes (6-7 different isoforms) were previously

1  
2  
3 492 [39-41]. For genes that were only previously available for *C. canephora*, (e.g. *SPI*), this  
4  
5 493 study also identified isoforms in Arabica. For genes that previously only had partial  
6  
7 494 sequences available, (e.g. *SPS2*), the transcripts identified in this study will guide further  
8  
9 495 studies and improve current databases. Furthermore, the low coverage annotation of long  
10  
11 496 sequences (>10kb) by BLASTx and BLASTn against the FOUR databases indicated the  
12  
13  
14 497 limited information on long sequences requiring further study.  
15  
16

### 17 498 *Transcriptome analysis of polyploids using long-read sequencing*

19  
20 499 LRS technologies show advantages in understanding complex transcriptomes, especially  
21  
22 500 from polyploid species [4, 42, 43]. First, this eliminates transcriptome reconstruction and that  
23  
24 501 reduces the computation time. This is an essential goal for bioinformatics data analysis and  
25  
26 502 software development [44]. To avoid obsolescence, transcriptome analysis calls for rapid  
27  
28 503 genomics and bioinformatics to reduce the time from experiment to publication. Secondly, as  
29  
30 504 there is no assembly of reads with LRS, there are no erroneous results due to misassemblies  
31  
32 505 caused by complex polyploid transcriptomes with a large number of repeats or homeolog  
33  
34 506 genes. For example, almost 80% of the wheat genome is repetitive [43]. Last but not least, it  
35  
36 507 shows the potential to capture rare or long sequences to provide an overview of the  
37  
38 508 transcriptome and fully characterise RNA diversity, like 5'UTR extension in this study,  
39  
40 509 alternative splicing, polyadenylation, etc. [4, 45].  
41  
42  
43  
44  
45  
46

47 510 However, LRS technologies have been normally biased with high error rates, for example,  
48  
49 511 previously released PacBio single molecule real-time sequencing (SMRT) reads had a very  
50  
51 512 high error rate, 11-14%, therefore, numerous methods have been proposed to correct the  
52  
53 513 sequences [46]. One common approach was to map back to a reference genome and (or) use  
54  
55 514 hybrid sequencing, for example, using short reads with high throughput to correct LRS  
56  
57 515 isoform sequences [5, 47]. However, caution is necessary when using this strategy. The  
58  
59  
60  
61  
62  
63  
64  
65

1  
2  
3  
4  
5  
6  
7  
8  
9  
10  
11  
12  
13  
14  
15  
16  
17  
18  
19  
20  
21  
22  
23  
24  
25  
26  
27  
28  
29  
30  
31  
32  
33  
34  
35  
36  
37  
38  
39  
40  
41  
42  
43  
44  
45  
46  
47  
48  
49  
50  
51  
52  
53  
54  
55  
56  
57  
58  
59  
60  
61  
62  
63  
64  
65

516 reference genome is often far from 100% accurate: 1) most draft genomes have numerous  
517 fragmented contigs or scaffolds with huge imbedded gaps. Even genomes previously  
518 considered well assembled have had many gaps[48]. 2) Problems also exist in poorly  
519 assembled gene loci. Few recently released genomes have been re-visited to generate  
520 improved assemblies [13]. 3) LRS isoform sequences normally come from different sources  
521 (e.g. genotype) to the reference genomes that they can be compared with. Hybrid sequencing  
522 correction may have system bias and result in loss of isoforms/transcript variants or generate  
523 a “compromised” consensus. Previously, it has been estimated that there was no approach  
524 that has achieved more than 60 % accuracy for transcript reconstruction, even for the most  
525 studied human genome [49]. For instance, short read platforms deliver data that is less  
526 representative of rare or long isoforms and there is a high chance of losing these reads from  
527 the long-read dataset when correcting.

528 Improved accuracy may be generated from the platform itself, for example, Pacbio Iso-seq  
529 generates improved accuracy from CCS reads. This allows multiple passes of each transcript.  
530 Each pass can be used to correct the others with their random errors (mainly indels). The  
531 isoform clustering and polishing in this protocol is expected to deliver 99% accuracy. Prior to  
532 size selection, normalisation was further applied in parallel to the dataset in this study to  
533 decrease the frequency of abundant reads and produce a more even representation of the  
534 transcriptome and to capture rare sequences. A highly diverse transcriptome has resulted. The  
535 abundance of genes that had not been previously sequenced (1,213), transcript variants and  
536 longer isoforms indicate the limits of previous studies and potential of LRS technologies.  
537 However, the limitation shows in detecting short sequences less than 300bp (raw data cut-  
538 off). The chances of large errors due to indels from Pacbio sequencing may produce reads  
539 shorter than the actual reads. Additionally, the Blue pippin size selection system starts from

540 500bp in the cDNA library preparation, with few sequences from the boundary (400-500bp).

541 Therefore, improvement is needed to capture a broader transcriptome.

542 In conclusion, this study will improve the understanding of the biology and genetic  
543 improvement of polyploid species such as coffee. It provides a useful technique to generate a  
544 full-length reference transcriptome and improve understanding of UTR regions.

### 545 **Additional information**

546 New sequence data used in this manuscript has been submitted to European Nucleotide  
547 Archive at EMBL database with accession number: PRJEB19262. Supporting data are also  
548 available via the *Gigascience* repository GigaDB (GigaDB, RRID:SCR\_004002) [21].  
549 Additional information on specific selected sequence IDs, such as high quality annotated  
550 sequences, novel genes in coffee, etc, are shown in supporting information 2. The python  
551 script to calculate cumulative identity and alignment length has been submitted to Github  
552 ([https://github.com/chengbing0404/BLAST5\\_result\\_handle](https://github.com/chengbing0404/BLAST5_result_handle)).

### 553 **Completing interests**

554 All authors have no conflicts of interest to this manuscript.

### 555 **Funding**

556 This study was funded by Australian Research Council (PROJECT ID: LP130100376) and  
557 Chinese Scholarship Council (2014-2018).

### 558 **Author's contributions**

559 B.C., A.F. and R.H. designed the research and discussed the results. B.C performed the  
560 experiment and analysis. B.C drafted the manuscript, R.H and AG refined it.

561 **Acknowledgements**

1  
2 562 We thank Green Cauldron Coffee (Australia) for providing coffee materials, Prathima  
3  
4 563 Perumal Thirugnanasambandam for assistance in sucrose synthase analysis, Kevin Smith and  
5  
6  
7 564 Erli Wang for help in the informatics pipeline and the Research Computing Center of the  
8  
9  
10 565 University of Queensland, Australia for access to high-performance computers. We also  
11  
12 566 appreciated the help from Poss Reading, Marta Brozynska, Adam Healey, Tiparat Tikapunya,  
13  
14  
15 567 Ravi Nirmal, Nam Hoang and Hayba Badro in coffee sampling.  
16  
17

18 **Reference**

- 19  
20 569 1. Yoo, M.-J., et al., *Nonadditive gene expression in polyploids*. Annual review of genetics, 2014.  
21 570 **48**: p. 485-517.  
22 571 2. Adams, K.L., et al., *Genes duplicated by polyploidy show unequal contributions to the*  
23 572 *transcriptome and organ-specific reciprocal silencing*. Proceedings of the National Academy  
24 573 of sciences, 2003. **100**(8): p. 4649-4654.  
25 574 3. Levasseur, A. and P. Pontarotti, *The role of duplications in the evolution of genomes*  
26 575 *highlights the need for evolutionary-based approaches in comparative genomics*. Biology  
27 576 direct, 2011. **6**(1): p. 11.  
28 577 4. Wang, B., et al., *Unveiling the complexity of the maize transcriptome by single-molecule*  
29 578 *long-read sequencing*. Nature Communications, 2016. **7**.  
30 579 5. Abdel-Ghany, S.E., et al., *A survey of the sorghum transcriptome using single-molecule long*  
31 580 *reads*. Nature Communications, 2016. **7**.  
32 581 6. Bicknell, A.A., et al., *Introns in UTRs: why we should stop ignoring them*. Bioessays, 2012.  
33 582 **34**(12): p. 1025-1034.  
34 583 7. Mignone, F., et al., *Untranslated regions of mRNAs*. Genome biology, 2002. **3**(3): p.  
35 584 reviews0004. 1.  
36 585 8. Van Veen, H., et al., *Transcriptomes of eight Arabidopsis thaliana accessions reveal core*  
37 586 *conserved, genotype-and organ-specific responses to flooding stress*. Plant physiology, 2016:  
38 587 p. pp. 00472.2016.  
39 588 9. Garg, R., et al., *Transcriptome analyses reveal genotype-and developmental stage-specific*  
40 589 *molecular responses to drought and salinity stresses in chickpea*. Scientific reports, 2016. **6**.  
41 590 10. Grabherr, M.G., et al., *Full-length transcriptome assembly from RNA-Seq data without a*  
42 591 *reference genome*. Nature biotechnology, 2011. **29**(7): p. 644-652.  
43 592 11. Wang, X.-W., et al., *De novo characterization of a whitefly transcriptome and analysis of its*  
44 593 *gene expression during development*. BMC genomics, 2010. **11**(1): p. 400.  
45 594 12. Li, P., et al., *The developmental dynamics of the maize leaf transcriptome*. Nature genetics,  
46 595 2010. **42**(12): p. 1060-1067.  
47 596 13. Michael, T.P. and R. VanBuren, *Progress, challenges and the future of crop genomes*. Current  
48 597 opinion in plant biology, 2015. **24**: p. 71-81.  
49 598 14. Denoeud, F., et al., *The coffee genome provides insight into the convergent evolution of*  
50 599 *caffeine biosynthesis*. science, 2014. **345**(6201): p. 1181-1184.  
51 600 15. Fridell, G., *Coffee*. 2014: John Wiley & Sons.  
52 601 16. Furtado, A., *RNA Extraction from Developing or Mature Wheat Seeds*. Cereal Genomics:  
53 602 Methods and Protocols, 2014: p. 23-28.  
54  
55  
56  
57  
58  
59  
60  
61  
62  
63  
64  
65



- 603 17. PacificBiosciences. *RS\_IsoSeq (v2.3) Tutorial 2*. 2. Isoform level clustering (ICE and Quiver)  
 1 604 2015; Available from:  
 2 605 [https://github.com/PacificBiosciences/cDNA\\_primer/wiki/RS\\_IsoSeq-%28v2.3%29-](https://github.com/PacificBiosciences/cDNA_primer/wiki/RS_IsoSeq-%28v2.3%29-Tutorial-%232.-Isoform-level-clustering-%28ICE-and-Quiver%29)  
 3 606 [Tutorial-%232.-Isoform-level-clustering-%28ICE-and-Quiver%29](https://github.com/PacificBiosciences/cDNA_primer/wiki/RS_IsoSeq-%28v2.3%29-Tutorial-%232.-Isoform-level-clustering-%28ICE-and-Quiver%29).  
 4 607 18. Fu, L., et al., *CD-HIT: accelerated for clustering the next-generation sequencing data*.  
 5 608 Bioinformatics, 2012. **28**(23): p. 3150-3152.  
 6 609 19. Cheng B, Furtado A, Henry R. *Processing of Pacbio Iso-seq sequences*. protocols.io.  
 7 610 <http://dx.doi.org/10.17504/protocols.io.ja3cign> , 2017  
 8 611 20. Afgan, E., et al., *Genomics Virtual Laboratory: a practical bioinformatics workbench for the*  
 9 612 *cloud*. PloS one, 2015. **10**(10): p. e0140829.  
 10 613 21. Cheng B, Furtado A, Henry R. *Supporting data for "Long-read sequencing of the coffee bean*  
 11 614 *transcriptome reveals the diversity of full length transcripts"*. GigaScience Database. 2017.  
 12 615 <http://dx.doi.org/10.5524/100340>.  
 13 616 22. Cheng B, Furtado A, Henry R. *Transcriptome annotation*. protocols.io.  
 14 617 <http://dx.doi.org/10.17504/protocols.io.ja4cigw> , 2017.  
 15 618 23. Mondego, J.M., et al., *An EST-based analysis identifies new genes and reveals distinctive*  
 16 619 *gene expression features of Coffea arabica and Coffea canephora*. BMC plant biology, 2011.  
 17 620 **11**(1): p. 1.  
 18 621 24. Dereeper, A., et al., *The coffee genome hub: a resource for coffee genomes*. Nucleic acids  
 19 622 research, 2015. **43**(D1): p. D1028-D1035.  
 20 623 25. Götz, S., et al., *High-throughput functional annotation and data mining with the Blast2GO*  
 21 624 *suite*. Nucleic acids research, 2008. **36**(10): p. 3420-3435.  
 22 625 26. Kearse, M., et al., *Geneious Basic: an integrated and extendable desktop software platform*  
 23 626 *for the organization and analysis of sequence data*. Bioinformatics, 2012. **28**(12): p. 1647-  
 24 627 1649.  
 25 628 27. Bailey, T.L., et al., *MEME SUITE: tools for motif discovery and searching*. Nucleic acids  
 26 629 research, 2009: p. gkp335.  
 27 630 28. Grillo, G., et al., *UTRdb and UTRsite (RELEASE 2010): a collection of sequences and regulatory*  
 28 631 *motifs of the untranslated regions of eukaryotic mRNAs*. Nucleic acids research, 2010.  
 29 632 **38**(suppl 1): p. D75-D80.  
 30 633 29. Yuyama, P.M., et al., *Transcriptome analysis in Coffea eugenioides, an Arabica coffee*  
 31 634 *ancestor, reveals differentially expressed genes in leaves and fruits*. Molecular Genetics and  
 32 635 Genomics, 2016. **291**(1): p. 323-336.  
 33 636 30. Nawrocki, E.P., et al., *Rfam 12.0: updates to the RNA families database*. Nucleic acids  
 34 637 research, 2014: p. gku1063.  
 35 638 31. Cheng, B., et al., *Influence of genotype and environment on coffee quality*. Trends in Food  
 36 639 Science & Technology, 2016.  
 37 640 32. Perrois, C., et al., *Differential regulation of caffeine metabolism in Coffea arabica (Arabica)*  
 38 641 *and Coffea canephora (Robusta)*. Planta, 2015. **241**(1): p. 179-191.  
 39 642 33. Ashihara, H. and A. Crozier, *Biosynthesis and catabolism of caffeine in low-caffeine-*  
 40 643 *containing species of Coffea*. Journal of agricultural and food chemistry, 1999. **47**(8): p. 3425-  
 41 644 3431.  
 42 645 34. Combes, M.C., et al., *Contribution of subgenomes to the transcriptome and their intertwined*  
 43 646 *regulation in the allopolyploid Coffea arabica grown at contrasted temperatures*. New  
 44 647 phytologist, 2013. **200**(1): p. 251-260.  
 45 648 35. Lodish, H., *Molecular cell biology*. 2008: Macmillan.  
 46 649 36. Rhind, N., et al., *Comparative functional genomics of the fission yeasts*. Science, 2011.  
 47 650 **332**(6032): p. 930-936.  
 48 651 37. Somers, J., T. Pöyry, and A.E. Willis, *A perspective on mammalian upstream open reading*  
 49 652 *frame function*. The international journal of biochemistry & cell biology, 2013. **45**(8): p.  
 50 653 1690-1700.

- 654 38. Hummel, M., et al., *Sucrose-mediated translational control*. Annals of botany, 2009: p.  
 1 655 mcp086.
- 2 656 39. Chen, A., et al., *Analyses of the sucrose synthase gene family in cotton: structure, phylogeny*  
 3 657 *and expression patterns*. BMC plant biology, 2012. **12**(1): p. 85.
- 4 658 40. Hirose, T., G.N. Scofield, and T. Terao, *An expression analysis profile for the entire sucrose*  
 5 659 *synthase gene family in rice*. Plant Science, 2008. **174**(5): p. 534-543.
- 6 660 41. Bieniawska, Z., et al., *Analysis of the sucrose synthase gene family in Arabidopsis*. The Plant  
 7 661 Journal, 2007. **49**(5): p. 810-828.
- 8 662 42. Minoche, A.E., et al., *Exploiting single-molecule transcript sequencing for eukaryotic gene*  
 9 663 *prediction*. Genome biology, 2015. **16**(1): p. 1.
- 10 664 43. Dong, L., et al., *Single-molecule real-time transcript sequencing facilitates common wheat*  
 11 665 *genome annotation and grain transcriptome research*. BMC genomics, 2015. **16**(1): p. 1039.
- 12 666 44. Haas, B.J., et al., *De novo transcript sequence reconstruction from RNA-seq using the Trinity*  
 13 667 *platform for reference generation and analysis*. Nature protocols, 2013. **8**(8): p. 1494-1512.
- 14 668 45. Gonzalez-Garay, M.L., *Introduction to isoform sequencing using pacific biosciences*  
 15 669 *technology (Iso-Seq)*, in *Transcriptomics and Gene Regulation*. 2016, Springer. p. 141-160.
- 16 670 46. Roberts, R.J., M.O. Carneiro, and M.C. Schatz, *The advantages of SMRT sequencing*. Genome  
 17 671 biology, 2013. **14**(7): p. 1.
- 18 672 47. Xu, Z., et al., *Full - length transcriptome sequences and splice variants obtained by a*  
 19 673 *combination of sequencing platforms applied to different root tissues of Salvia miltiorrhiza*  
 20 674 *and tanshinone biosynthesis*. The Plant Journal, 2015. **82**(6): p. 951-961.
- 21 675 48. Lamesch, P., et al., *The Arabidopsis Information Resource (TAIR): improved gene annotation*  
 22 676 *and new tools*. Nucleic acids research, 2012. **40**(D1): p. D1202-D1210.
- 23 677 49. Korf, I., *Genomics: the state of the art in RNA-seq analysis*. Nature methods, 2013. **10**(12): p.  
 24 678 1165-1166.

679 **Tables and figure legends**

680 Table 1 Arabica long-read sequencing transcriptome annotation with different databases

| Databases                          | Number of sequences annotated | % of sequences annotated |
|------------------------------------|-------------------------------|--------------------------|
| Long-read sequencing transcriptome | 95,995                        | -                        |
| BLAST                              | 94,709                        | 98.66                    |
| Mapped                             | 78,571                        | 81.85                    |
| InterProScan                       | 70,774                        | 73.73                    |
| InterProScan GOs                   | 33,605                        | 35.01                    |
| GO slim                            | 58,050                        | 60.47                    |
| KEGG                               | 11,489                        | 11.97                    |

681

682 Table 2 Arabica long-read sequencing isoforms compared to *Coffea canephora* coding sequences and *Coffea*  
 683 *arabica* EST sequences

| Different datasets                                   | GC content % | N50 (bp) | average length (bp) | min length (bp) | max_length (bp) | Number of sequences |
|------------------------------------------------------|--------------|----------|---------------------|-----------------|-----------------|---------------------|
| <i>Coffea arabica</i> EST database <sup>1 [23]</sup> | 44.7         | 734      | 662                 | 32              | 3,584           | 35,153              |

|                                                                  |             |              |              |            |               |               |
|------------------------------------------------------------------|-------------|--------------|--------------|------------|---------------|---------------|
| <i>Coffea canphora</i> coding<br>sequences with UTR <sup>2</sup> | 42.6        | 2,046        | 1,616        | 45         | 17,206        | 25,570        |
| <b><i>Coffea arabica</i> long-read<br/>sequencing isoforms</b>   | <b>41.4</b> | <b>4,865</b> | <b>3,236</b> | <b>301</b> | <b>23,335</b> | <b>95,995</b> |

---

Note: <sup>1</sup> <http://bioinfo03.ibi.unicamp.br/coffea/data/CA.fasta>; <sup>2</sup> [http://coffee-genome.org/sites/coffee-genome.org/files/download/coffea\\_cds.fna.gz](http://coffee-genome.org/sites/coffee-genome.org/files/download/coffea_cds.fna.gz).

1  
2  
3  
4  
5 684  
6 685  
7 686  
8  
9 687  
10  
11 688  
12  
13  
14  
15  
16  
17  
18  
19  
20  
21  
22  
23  
24  
25  
26  
27  
28  
29  
30  
31  
32  
33  
34  
35  
36  
37  
38  
39  
40  
41  
42  
43  
44  
45  
46  
47  
48  
49  
50  
51  
52  
53  
54  
55  
56  
57  
58  
59  
60  
61  
62  
63  
64  
65

16  
17  
18  
19  
20  
21  
22  
23  
24  
25  
26  
27  
28  
29  
30  
31  
32  
33  
34  
35  
36  
37  
38  
39  
40  
41  
42  
43  
44  
45  
46  
47  
48  
49  
50  
51  
52  
53  
54  
55  
56  
57  
58  
59  
60  
61  
62  
63  
64  
65

Table 3 Details of caffeine candidate genes, putative transcript variants annotated and 5'UTR extension information

| Candidate genes                            | Accession number | Species             | Source      | Abbreviation | length (bp) | completeness | Putative transcript variants from LRS isoform sequences   | 5'UTR extension |
|--------------------------------------------|------------------|---------------------|-------------|--------------|-------------|--------------|-----------------------------------------------------------|-----------------|
| xanthosine methyltransferase 1             | AB048793         | <i>C. arabica</i>   | mRNA        | CaXMT1       | 1,316       | YES          | c69597/f1p2/1421<br>c154338/f1p2/1360<br>c71416/f3p3/1376 | YES             |
|                                            | JX978514         | <i>C. arabica</i>   | Genomic DNA | G-CaXMT1     | 1,987       | YES          |                                                           |                 |
|                                            | DQ422954         | <i>C. canephora</i> | mRNA        | CcXMT1       | 1,316       | YES          |                                                           |                 |
|                                            | JX978509         | <i>C. canephora</i> | Genomic DNA | G-CcXMT1     | 1,994       | YES          |                                                           |                 |
| xanthosine methyltransferase2              | JX978515         | <i>C. arabica</i>   | Genomic DNA | G-CaXMT2     | 2,038       | YES          | Not identified                                            | -               |
| 7-methylxanthine N-methyltransferase 1     | AB048794         | <i>C. arabica</i>   | mRNA        | CaMXMT1      | 1,298       | YES          | c20397/f5p1/1361                                          | YES             |
|                                            | JX978511         | <i>C. arabica</i>   | Genomic DNA | G-CaMXMT1    | 1,838       | YES          |                                                           |                 |
|                                            | HQ616707         | <i>C. canephora</i> | mRNA        | CcMXMT1      | 1,222       | YES          |                                                           |                 |
|                                            | JX978507         | <i>C. canephora</i> | Genomic DNA | G-CcMXMT1    | 1,829       | YES          |                                                           |                 |
| 7-methylxanthine N-methyltransferase 2     | AB084126         | <i>C. arabica</i>   | mRNA        | CaMXMT2      | 1,155       | YES          | c10402/f2p3/1277                                          | YES             |
|                                            | JX978512         | <i>C. arabica</i>   | Genomic DNA | G-CaMXMT2    | 2,010       | YES          |                                                           |                 |
| 3,7-dimethylxanthine N-methyltransferase 1 | AB084125         | <i>C. arabica</i>   | mRNA        | CaDXMT1      | 1,155       | YES          | c25904/f2p0/977<br>c71881/f6p2/1386                       | YES             |
|                                            | JX978510         | <i>C. arabica</i>   | Genomic DNA | G-CaDXMT1    | 2,063       | YES          |                                                           |                 |
| 3,7-dimethylxanthine N-methyltransferase 2 | KJ577793         | <i>C. arabica</i>   | mRNA        | CaDXMT2      | 1,155       | YES          | c63815/f1p2/1273<br>c48759/f1p1/1517<br>c26870/f6p5/1402  | YES             |
|                                            | KJ577792         | <i>C. arabica</i>   | Genomic DNA | G-CaDXMT2    | 2,006       | YES          |                                                           |                 |
|                                            | DQ422955         | <i>C. canephora</i> | mRNA        | CcDXMT1      | 1,364       | YES          |                                                           |                 |

16  
17  
18  
19  
20  
21  
22  
23  
24  
25  
26  
27  
28  
29  
30  
31  
32  
33  
34  
35  
36  
37  
38  
39  
40  
41  
42  
43  
44  
45  
46  
47  
48  
49  
50  
51  
52  
53  
54  
55  
56  
57  
58  
59  
60  
61  
62  
63  
64  
65

Table 4 Details of sucrose candidate genes, putative transcript variants annotated and 5'UTR extension information

| Candidate genes              | Accession number | Species             | Source      | Abbreviation | length (bp) | completeness | Putative transcript variants from LRS isoform sequences                                      | 5'UTR extension |
|------------------------------|------------------|---------------------|-------------|--------------|-------------|--------------|----------------------------------------------------------------------------------------------|-----------------|
| Sucrose synthase 1           | AM087674.1       | <i>C. arabica</i>   | mRNA        | CaSS1        | 2,979       | YES          | c86432/f7p9/4842<br>c91298/f1p1/3137<br>c84406/f3p18/2975                                    | YES             |
|                              | DQ834312.1       | <i>C. canephora</i> | mRNA        | CcSS2        | 2,989       | YES          | c62911/f29p21/2965<br>c92344/f1p26/4662<br>c92296/f1p5/4676<br>c89510/f1p6/4592              |                 |
|                              | AJ880768.2       | <i>C. canephora</i> | Genomic DNA | G-CcSS1      | 3,957       | exon 1-13    | c106591/f2p0/4381<br>c72639/f25p28/2961                                                      |                 |
| Sucrose synthase 2           | AM087675.1       | <i>C. arabica</i>   | mRNA        | CaSS2        | 2,889       | YES          | c73322/f3p2/3080                                                                             | YES             |
|                              | AM087676.1       | <i>C. canephora</i> | Genomic DNA | G-CcSS2      | 5,672       | exon 1-15    | c75363/f3p2/2906                                                                             |                 |
| Sucrose phosphate synthase 1 | DQ834321.1       | <i>C. canephora</i> | mRNA        | CcSPS1       | 3,150       | YES          | c51110/f2p0/3136                                                                             | YES             |
|                              | DQ842233.1       | <i>C. canephora</i> | Genomic DNA | G-CcSPS1     | 8,215       | YES          |                                                                                              |                 |
| Sucrose phosphate synthase 2 | DQ842234.1       | <i>C. canephora</i> | Genomic DNA | G-CcSPS2     | 1,550       | NO           | c103631/f1p2/4695<br>c88660/f2p0/4282<br>c106342/f1p4/4274<br>c104672/f1p1/4440<br>(reverse) | YES             |

Table 5 Results of 5' UTRs from long-read sequencing scanned with UTRdb. uORF, Upstream Open Reading Frame.

| No. | Sequence name      | 5' UTR length (bp) | uORF |
|-----|--------------------|--------------------|------|
| 1   | c86432/f2p7/4842   | 2,131              | 12   |
| 2   | c91298/f1p1/3137   | 347                | 2    |
| 3   | c84406/f3p18/2975  | 242                | 2    |
| 4   | c62911/f29p21/2965 | 218                | 0    |
| 5   | c92344/f1p26/4662  | 1,981              | 10   |
| 6   | c92296/f1p5/4676   | 1,884              | 12   |
| 7   | c89510/f1p6/4592   | 1,871              | 11   |
| 8   | c106591/f2p0/4381  | 1,683              | 11   |
| 9   | c72639/f25p28/2961 | 224                | 0    |

Figure 1 Coffee fruits of immature, intermediate and mature stages

Figure 2 Sequence distribution, comparison of the number of sequences and their length. Coffee long-read sequencing isoforms, *C.canephora* coding sequences with UTR and *C. arabica* EST database were included.

Figure 3 Putative transcript variants from long-read sequencing aligned to reference caffeine genes. a. Main caffeine biosynthesis pathway in coffee, adaptive from Cheng, Furtado [31]. b. Alignment of three Arabica putative XMT1 variants from long-read sequencing (c69597/f1p2/1412, c154338/f1p2/1360 and c71416/f3p3/1376), *Coffea arabica* and *Coffea canephora* XMT1 (CaXMT1 and CcXMT1) to Arabica XMT1 genomic DNA sequence (G-CaXMT1). c. Possible alternative polyadenylation of putative XMT1 Iso-seq variant (c25904/f2p0/977) from long-read sequencing; G-CaDXMT1, Arabica DXMT1 genomic DNA sequence; CaDXMT1, DXMT1 coding sequence; d. Two polyadenylation signals were identified in 3'ends of c25904/f2p0/977; e. Possible alternative splicing (intron retention) in one of the putative DXMT2 variants (c48759/f1p1/1517) from long-read sequencing transcripts; G-CaDXMT2, Arabica DXMT2 genomic DNA sequence; CaDXMT2, Arabica DXMT2 coding sequence. (Note: black colour in the alignment means different nucleotides to reference sequence, Arabica genomic XMT1, while grey colour means the same nucleotides as the reference.).

Figure 4 Motif search results of putative sucrose synthase gene 1 from long read sequencing. a. Ten motifs were annotated in 9 putative sucrose synthase 1 variants from long-read sequencing, analysed by MEME 4.11.2. b. Motif location of 9 putative sucrose synthase 1 variants. Different motifs were highlighted with red arrows and intron retention was shown with dashed boxes.

Figure 5 Putative variants from long-read sequencing aligned to the reference sucrose genes. a. Possible sucrose metabolism in coffee; SS, sucrose synthase; SPS, sucrose phosphate synthase; SP, sucrose phosphatase; INV, invertase; CINV, cell wall invertase (modified from Cheng B. et al. (2016)); b. Alignment of 9 Putative Sucrose synthase variants from long-read sequencing and *C.arabica* sucrose synthase gene 1 (CaSS1) to *Coffea canephora* genomic sucrose synthase 1 (exons 1-13) (G-CcSS1 (1-13)); Green box highlights variants result from different sub-genome copies, while intron retention events were marked with the blue box highlight; c. polyploid expression when zooming green area in 100%; d. possible alternative splicing (intron retention) from a *C.canephora* sub-genome copy when zooming blue box in 100%; e. possible intron retention from a *C.eugenoides* sub-genome copy when zooming blue area in 100%.red line classifies two groups of variants as different sub-genome copies. Different nucleotides compared to the consensus were highlighted in black in the alignment; f. Putative variants from long read sequencing aligned with *C.canephora* genomic sucrose phosphate synthase 2 sequence (G-CcSPS2); FWD, forward sequence; REV, reverse sequence. Different nucleotides compared to the consensus were highlighted in black in the alignment.

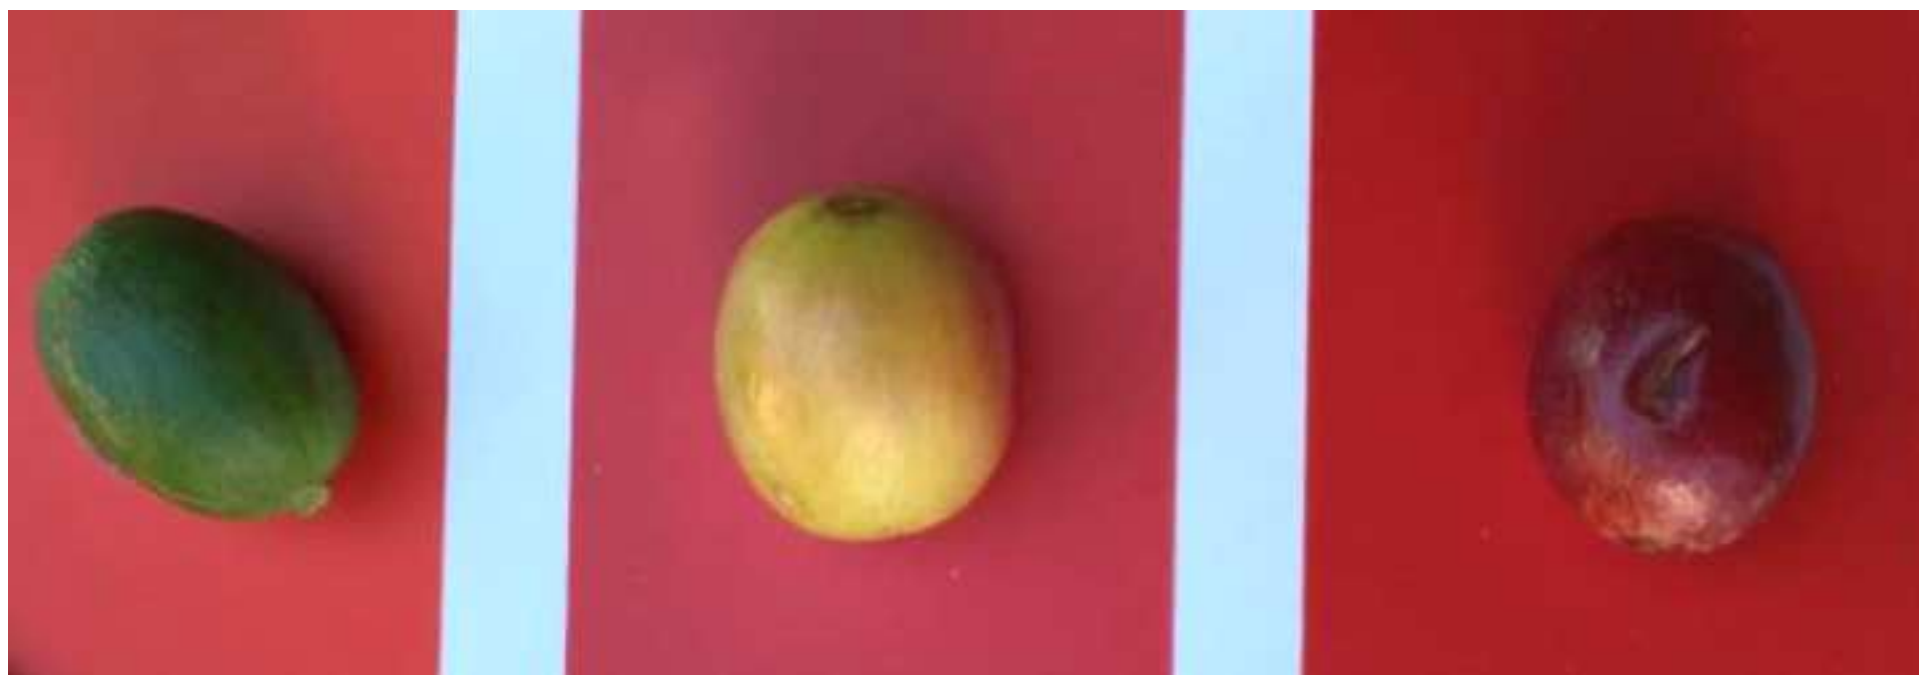

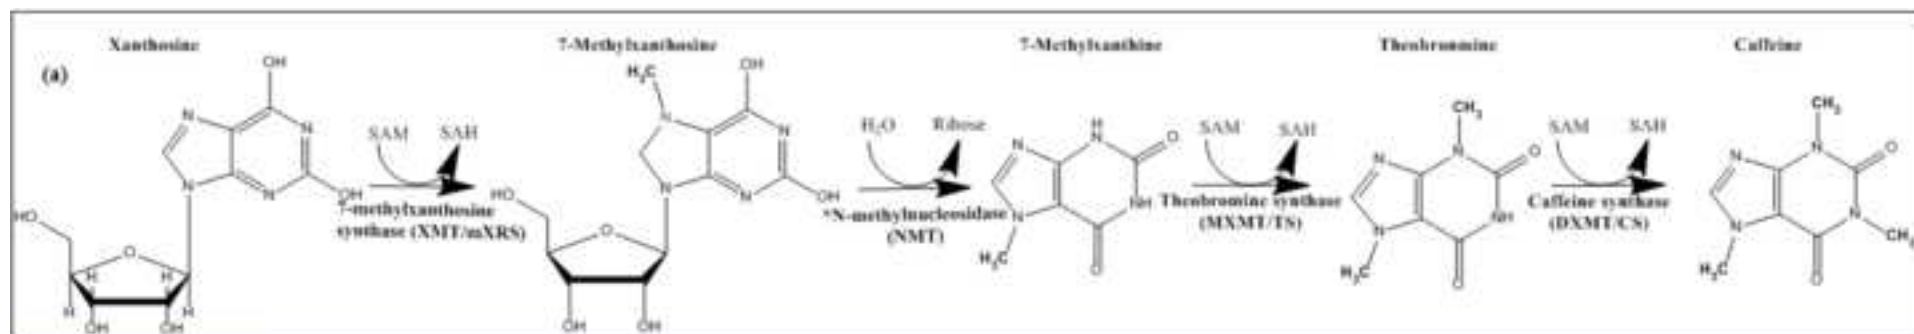



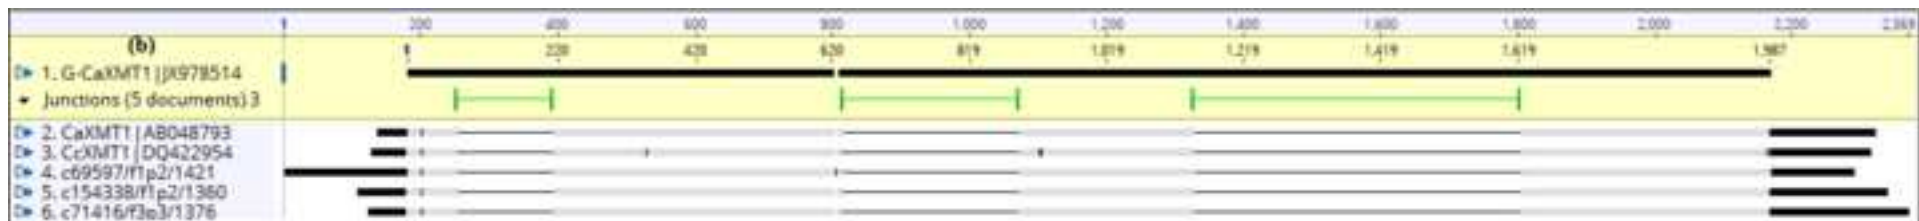



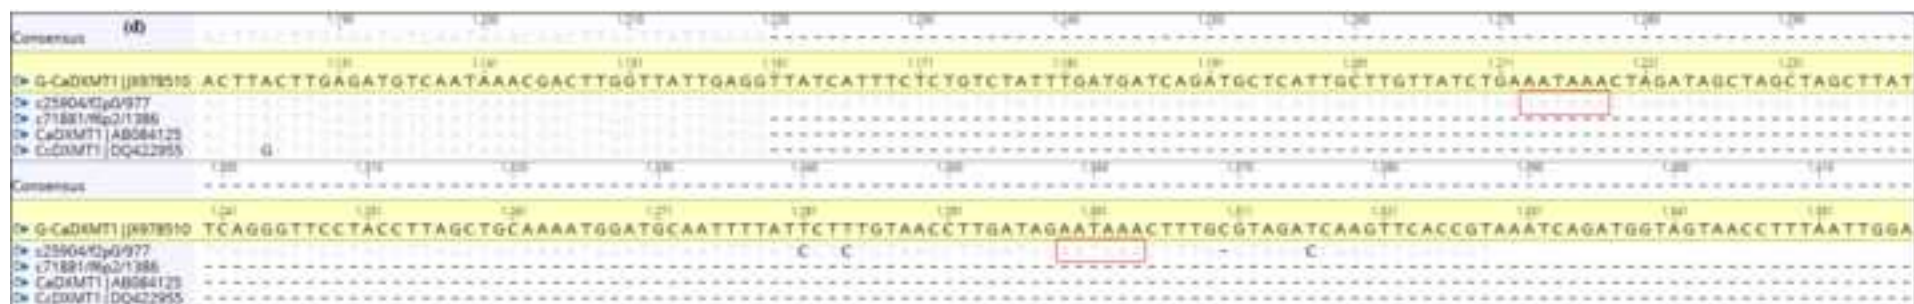

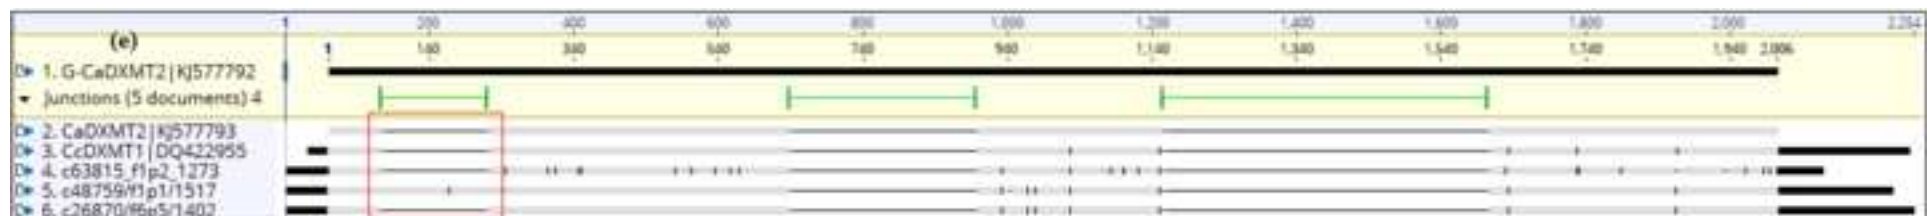

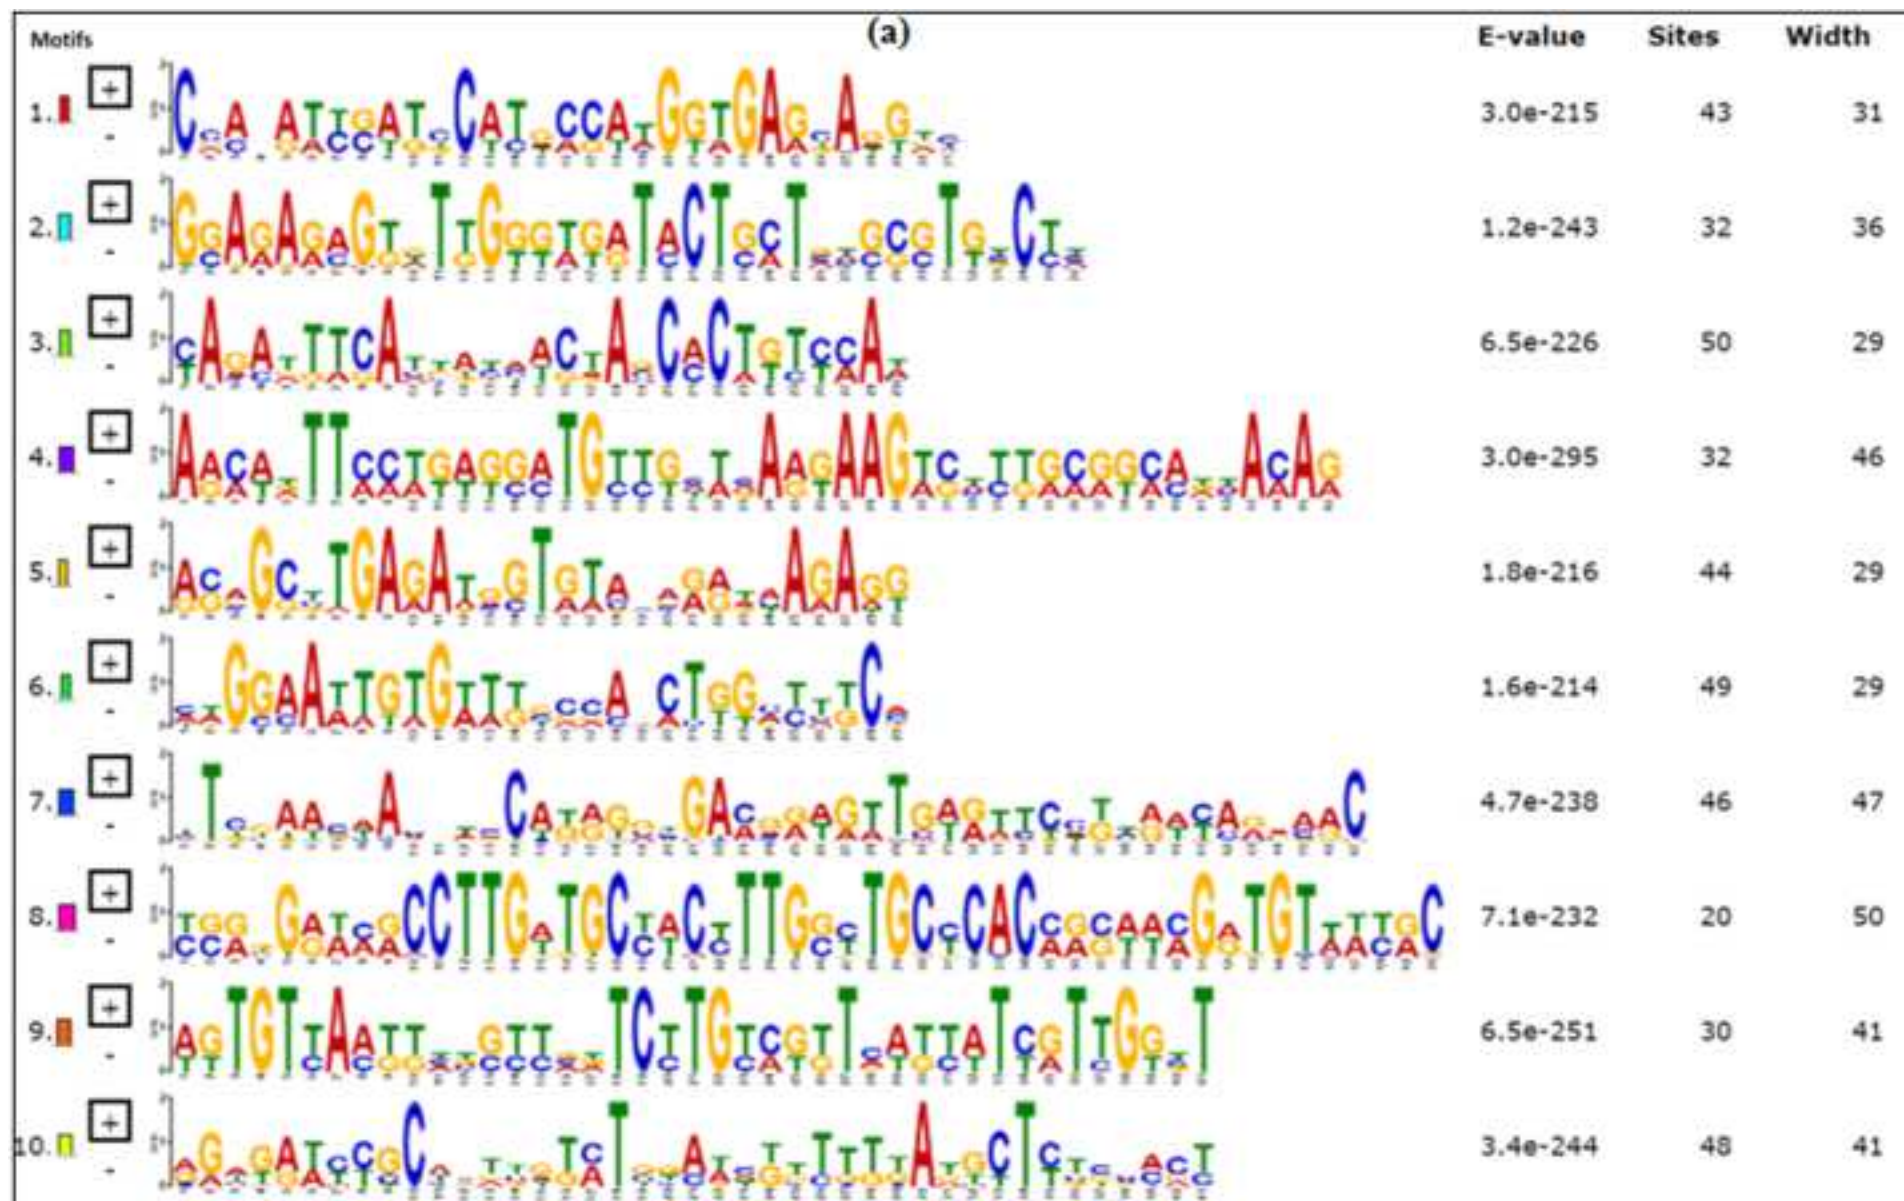

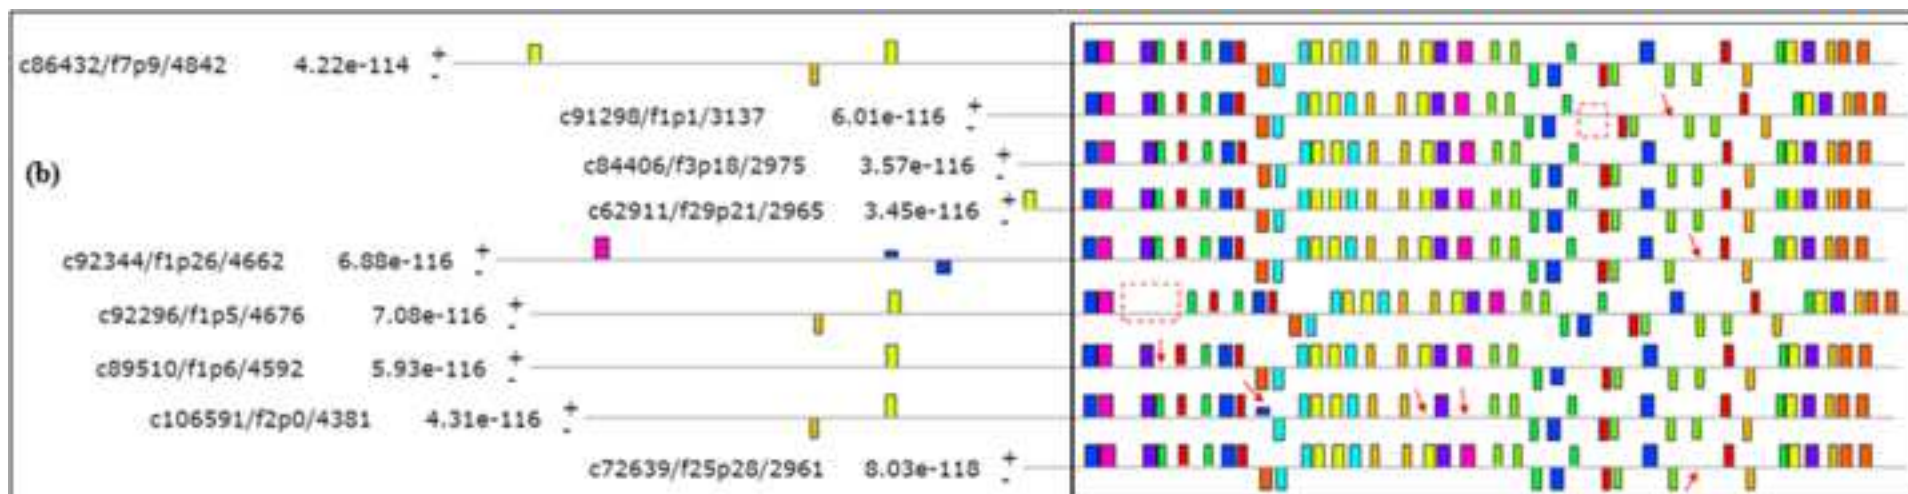

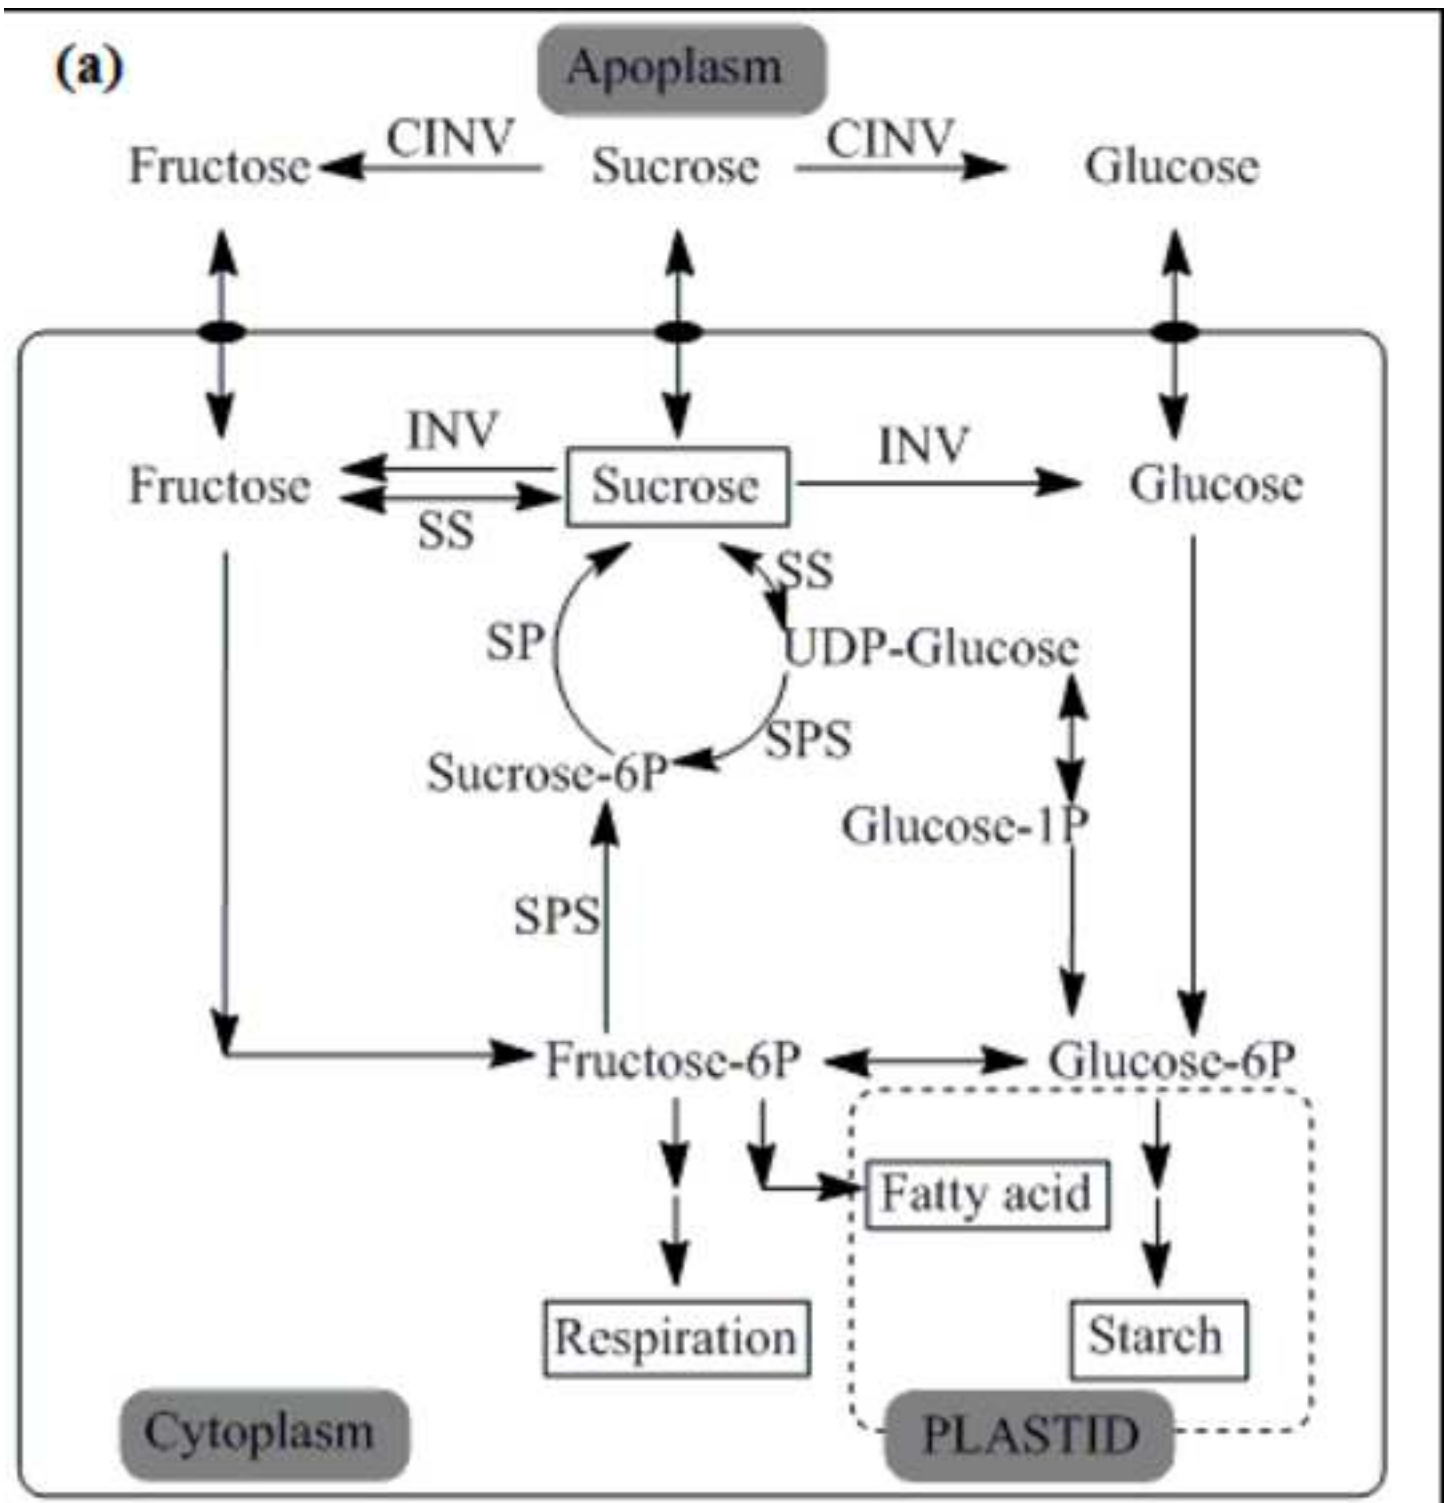

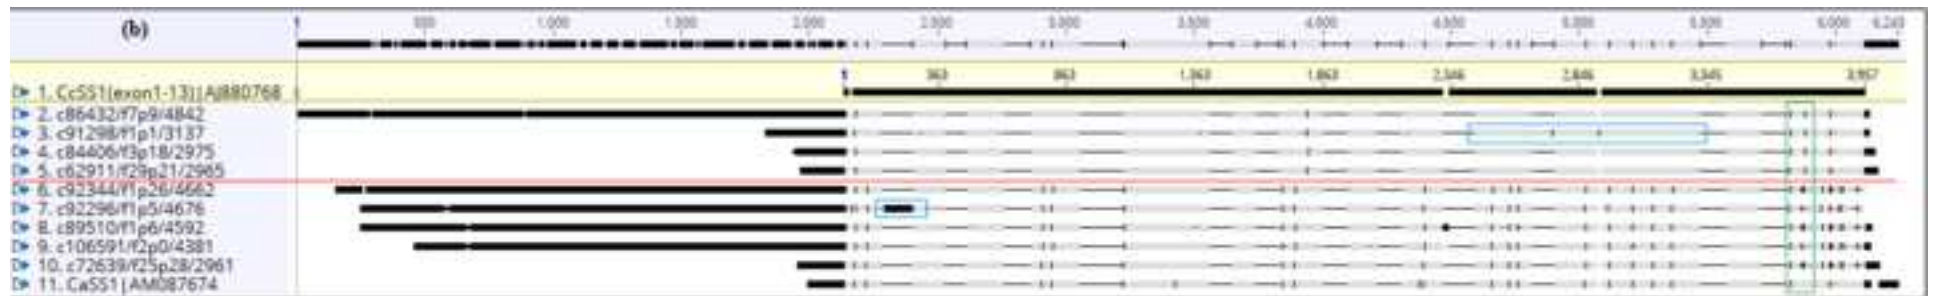





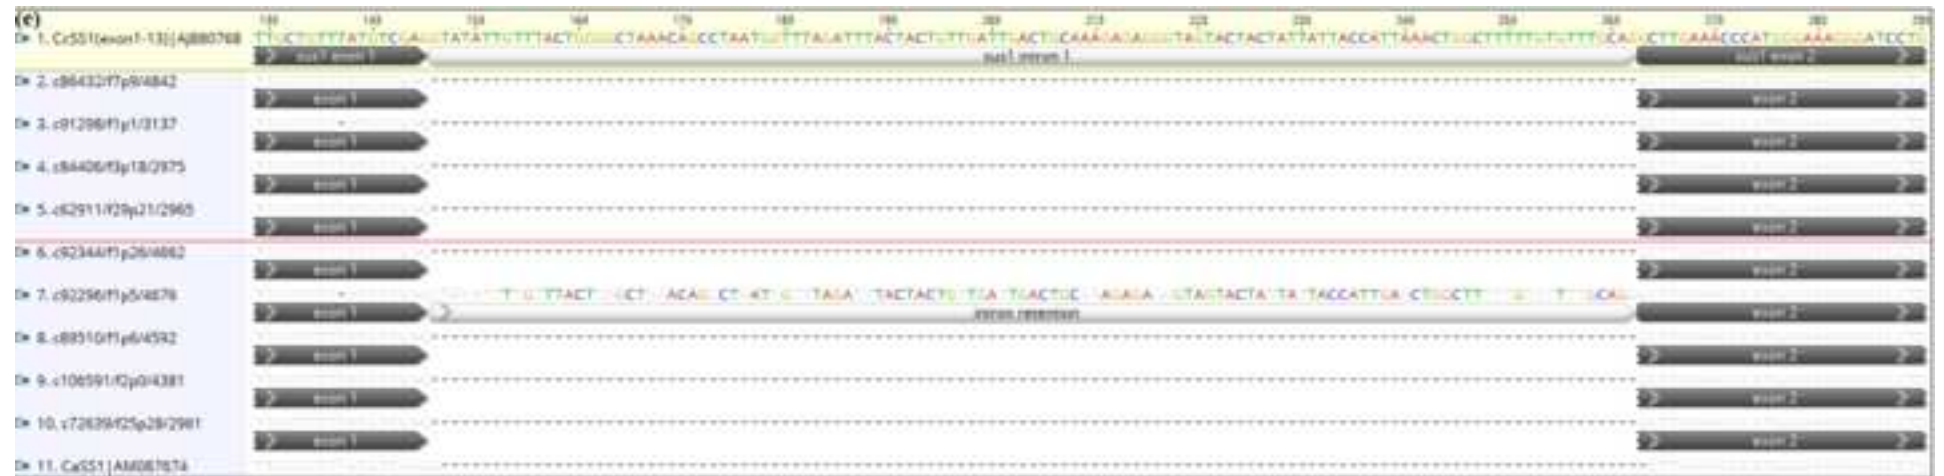

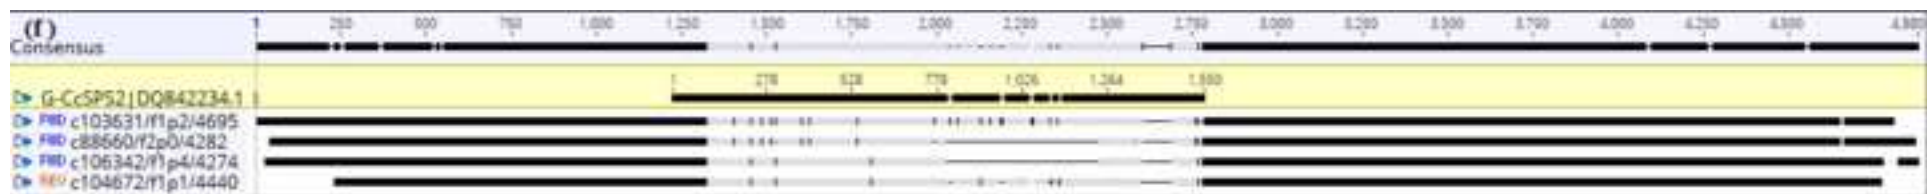

## Distribution of number of sequences with length

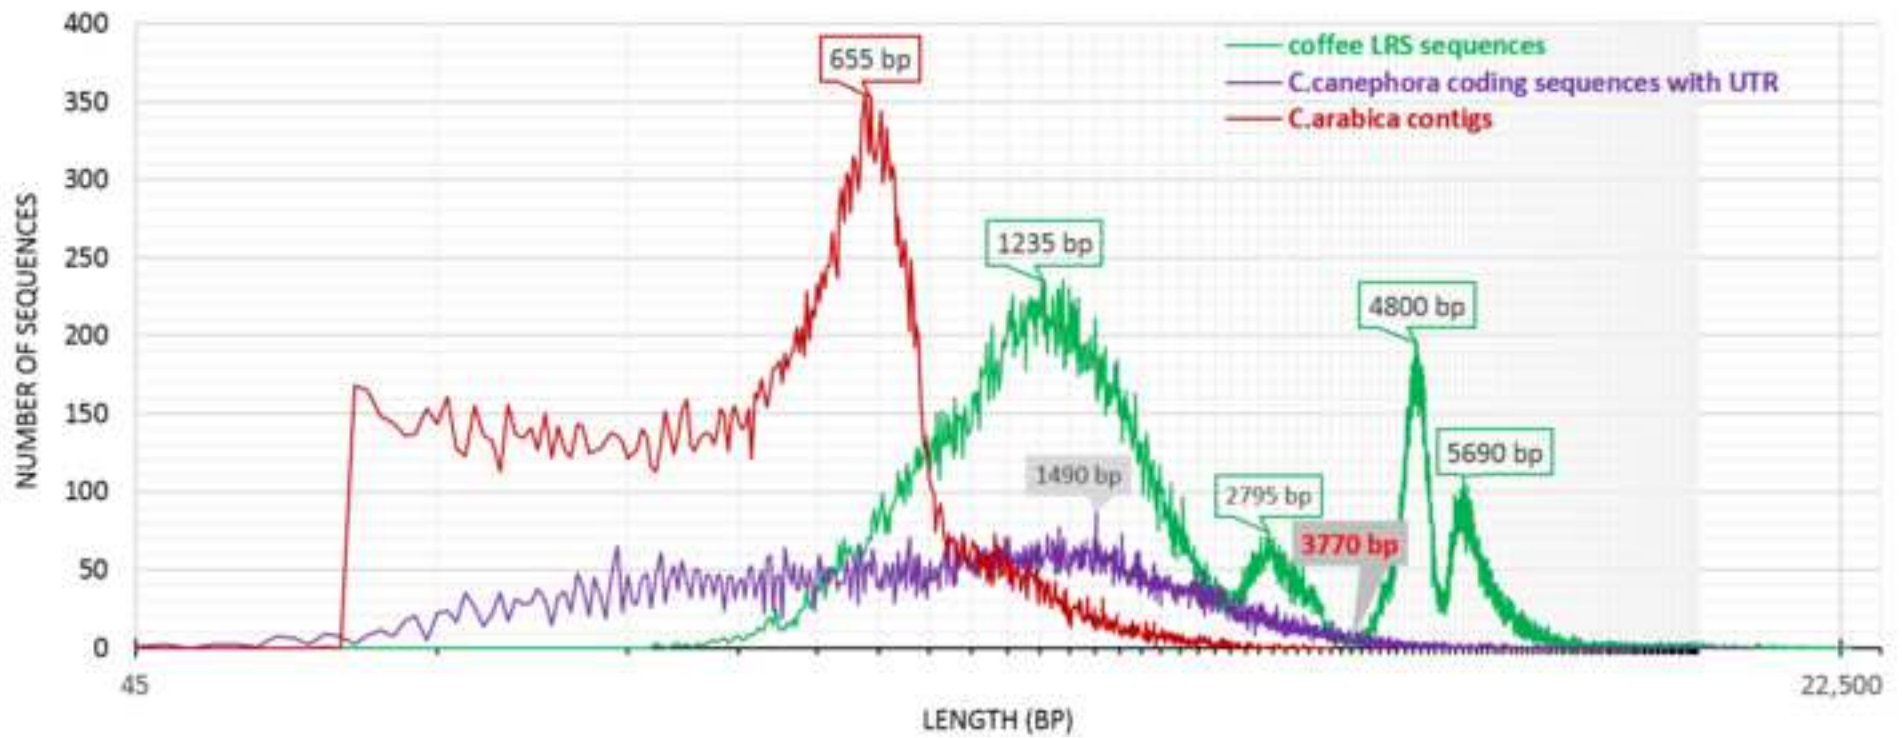

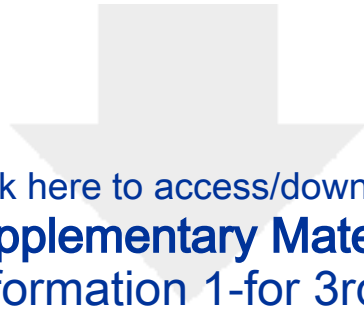

[Click here to access/download](#)

**Supplementary Material**

3. supporting information 1-for 3rd submission.pdf

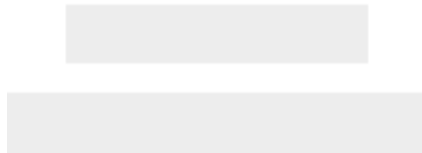

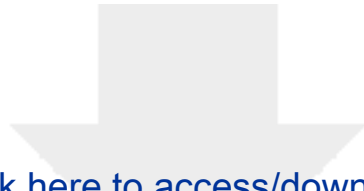

Click here to access/download

**Supplementary Material**

4. supporting information 2-for 3rd submission.xlsx

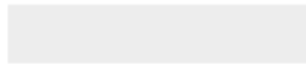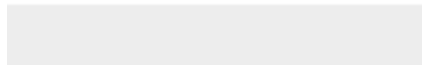

Supplement: gix086_giga-d-17-00024_revision-4.pdf [file gix086_giga-d-17-00024_revision-4.pdf]
