# Supplementary material for: Long-read sequencing of the coffee bean transcriptome reveals the diversity of full-length transcripts
Source: PubMed Central journal article supplement (PMC5737654; doi:10.1093/gigascience/gix086), 2017-08-30
Supplement: gix086_response-to-reviewer-comments_revision-3.pdf [file gix086_response-to-reviewer-comments_revision-3.pdf]

## **Author's Response To Reviewer Comments**

Citations to protocols now added
